# Supplementary material for: Risk factors for severe outcomes in people with diabetes hospitalised for COVID-19: a cross-sectional database study
Source: PubMed Central journal article supplement — BMJ Open. 2021 Jul 22;11(7):e051237. doi: 10.1136/bmjopen-2021-051237 (PMC8300551; doi:10.1136/bmjopen-2021-051237), 2021-07-22
Supplement: bmjopen-2021-051237.draft_revisions.pdf [file bmjopen-2021-051237.draft_revisions.pdf]

# BMJ Open

BMJ Open is committed to open peer review. As part of this commitment we make the peer review history of every article we publish publicly available.

When an article is published we post the peer reviewers' comments and the authors' responses online. We also post the versions of the paper that were used during peer review. These are the versions that the peer review comments apply to.

The versions of the paper that follow are the versions that were submitted during the peer review process. They are not the versions of record or the final published versions. They should not be cited or distributed as the published version of this manuscript.

BMJ Open is an open access journal and the full, final, typeset and author-corrected version of record of the manuscript is available on our site with no access controls, subscription charges or pay-per-view fees (<http://bmjopen.bmj.com>).

If you have any questions on BMJ Open's open peer review process please email [info.bmjopen@bmj.com](mailto:info.bmjopen@bmj.com)

# BMJ Open

## Risk factors for severe outcomes in people with diabetes hospitalized for COVID-19

|                               |                                                                                                                                                                                                                                                                                                                                                                                                                                                                                                                                                                                                                                                                                                                                                                                                                                                                                                                                                                                                                                                                                                                                                                                                                                                                                                                                               |
|-------------------------------|-----------------------------------------------------------------------------------------------------------------------------------------------------------------------------------------------------------------------------------------------------------------------------------------------------------------------------------------------------------------------------------------------------------------------------------------------------------------------------------------------------------------------------------------------------------------------------------------------------------------------------------------------------------------------------------------------------------------------------------------------------------------------------------------------------------------------------------------------------------------------------------------------------------------------------------------------------------------------------------------------------------------------------------------------------------------------------------------------------------------------------------------------------------------------------------------------------------------------------------------------------------------------------------------------------------------------------------------------|
| Journal:                      | <i>BMJ Open</i>                                                                                                                                                                                                                                                                                                                                                                                                                                                                                                                                                                                                                                                                                                                                                                                                                                                                                                                                                                                                                                                                                                                                                                                                                                                                                                                               |
| Manuscript ID                 | bmjopen-2021-051237                                                                                                                                                                                                                                                                                                                                                                                                                                                                                                                                                                                                                                                                                                                                                                                                                                                                                                                                                                                                                                                                                                                                                                                                                                                                                                                           |
| Article Type:                 | Original research                                                                                                                                                                                                                                                                                                                                                                                                                                                                                                                                                                                                                                                                                                                                                                                                                                                                                                                                                                                                                                                                                                                                                                                                                                                                                                                             |
| Date Submitted by the Author: | 15-Mar-2021                                                                                                                                                                                                                                                                                                                                                                                                                                                                                                                                                                                                                                                                                                                                                                                                                                                                                                                                                                                                                                                                                                                                                                                                                                                                                                                                   |
| Complete List of Authors:     | <p>Ortega, Emilio; Hospital Clinic de Barcelona<br/> Corcoy, Rosa; Hospital de la Santa Creu i Sant Pau, Gratacòs, Mònica; IDIAP Jordi Gol<br/> Cos Claramunt, Francesc Xavier; IDIAP Jordi Gol<br/> Mata-Cases, Manel; IDIAP Jordi Gol, DAP-Cat Group, Unitat de Suport a la Recerca Barcelona; Institut Català De La Salut, La Mina Primary Health Care Centre<br/> Puig- Treserra, Ramon ; IDIAP Jordi Gol<br/> Real, Jordi; Institut Universitari d'Investigaci Primaria Jordi Gol (IDIAP Jordi Gol), DAP-Cat group. Unitat de Suport a la Recerca Barcelona Ciutat<br/> Vlacho, Bogdan; IDIAP Jordi Gol<br/> Castelblanco, Esmeralda; Hospital de la Santa Creu i Sant Pau, Endocrinology<br/> Domingo, Pere; Hospital de la Santa Creu i Sant Pau, Infectious Diseases<br/> Khunti, Kamlesh; University of Leicester, Diabetes Research Centre<br/> Franch-Nadal, Josep; DAP-Cat group. Unitat de Suport a la Recerca Barcelona Ciutat, Institut Universitari d'Investigació en Atenció Primària Jordi Gol (IDIAP Jordi Gol); Primary Health Care Center Raval Sud, Gerència d'Àmbit d'Atenció Primària Barcelona Ciutat, Institut Català de la Salut<br/> Mauricio, Didac ; Hospital de la Santa Creu i Sant Pau, Endocrinology &amp; Nutrition; Fundacio Institut de Recerca Hospital de la Santa Creu i Sant Pau, Didac Mauricio</p> |
| Keywords:                     | COVID-19, General diabetes < DIABETES & ENDOCRINOLOGY, Epidemiology < INFECTIOUS DISEASES                                                                                                                                                                                                                                                                                                                                                                                                                                                                                                                                                                                                                                                                                                                                                                                                                                                                                                                                                                                                                                                                                                                                                                                                                                                     |
|                               |                                                                                                                                                                                                                                                                                                                                                                                                                                                                                                                                                                                                                                                                                                                                                                                                                                                                                                                                                                                                                                                                                                                                                                                                                                                                                                                                               |

SCHOLARONE™  
Manuscripts

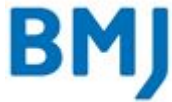

I, the Submitting Author has the right to grant and does grant on behalf of all authors of the Work (as defined in the below author licence), an exclusive licence and/or a non-exclusive licence for contributions from authors who are: i) UK Crown employees; ii) where BMJ has agreed a CC-BY licence shall apply, and/or iii) in accordance with the terms applicable for US Federal Government officers or employees acting as part of their official duties; on a worldwide, perpetual, irrevocable, royalty-free basis to BMJ Publishing Group Ltd ("BMJ") its licensees and where the relevant Journal is co-owned by BMJ to the co-owners of the Journal, to publish the Work in this journal and any other BMJ products and to exploit all rights, as set out in our [licence](#).

The Submitting Author accepts and understands that any supply made under these terms is made by BMJ to the Submitting Author unless you are acting as an employee on behalf of your employer or a postgraduate student of an affiliated institution which is paying any applicable article publishing charge ("APC") for Open Access articles. Where the Submitting Author wishes to make the Work available on an Open Access basis (and intends to pay the relevant APC), the terms of reuse of such Open Access shall be governed by a Creative Commons licence – details of these licences and which [Creative Commons](#) licence will apply to this Work are set out in our licence referred to above.

Other than as permitted in any relevant BMJ Author's Self Archiving Policies, I confirm this Work has not been accepted for publication elsewhere, is not being considered for publication elsewhere and does not duplicate material already published. I confirm all authors consent to publication of this Work and authorise the granting of this licence.

# Risk factors for severe outcomes in people with diabetes hospitalized for COVID-19

Emilio Ortega <sup>1,2,3</sup>, Rosa Corcoy <sup>4,5,6</sup>, Mònica Gratacòs<sup>1</sup>, Xavier Cos-Claramunt <sup>1,7</sup>, Manel Mata-Cases <sup>1,8,10</sup>, Ramon Puig- Treserra<sup>1</sup>, Jordi Real <sup>1</sup>, Bogdan Vlacho <sup>1</sup>, Esmeralda Castelblanco <sup>1,8</sup>, Pere Domingo <sup>9</sup>, Kamlesh Khunti <sup>11</sup>, Josep Franch-Nadal <sup>1,8,12\*</sup> and Dídac Mauricio <sup>1,4,8,13\*</sup>

<sup>1</sup> DAP-Cat group, Unitat de Suport a la Recerca Barcelona, Fundació Institut Universitari per a la recerca a l'Atenció Primària de Salut Jordi Gol i Gurina (IDIAPJGol), Barcelona, Spain;

<sup>2</sup> CIBER of physiopathology of Obesity and Nutrition (CIBEROBN), Instituto de Salud Carlos III (ISCIII), Spain

<sup>3</sup> Department of Endocrinology and Nutrition, Institut d'Investigacions Biomèdiques August Pi i Suñer, Hospital Clinic, Barcelona, Spain;

<sup>4</sup> Department of Endocrinology and Nutrition, Hospital Universitari de la Santa Creu i Sant Pau;

<sup>5</sup> Department of Medicine, Universitat Autònoma de Barcelona, Barcelona, Spain

<sup>6</sup> CIBER of Bioengineering, Biomaterials and Nanomedicine (CIBER-BBN), Instituto de Salud Carlos III (ISCIII), Spain

<sup>7</sup> Innovation office at Institut Català de la Salut, Barcelona, Spain

<sup>8</sup> CIBER of Diabetes and Associated Metabolic Diseases (CIBERDEM), Instituto de Salud Carlos III (ISCIII), Spain

<sup>9</sup> Infectious Diseases, Hospital Universitari de la Santa Creu i Sant Pau, Institut de Recerca Hospital Universitari de la Santa Creu i Sant Pau;

<sup>10</sup> Primary Health Care Center La Mina, Gerència d'Àmbit d'Atenció Primària Barcelona Ciutat, Institut Català de la Salut, Sant Adrià de Besòs, Spain

<sup>11</sup> Diabetes Research Centre, University of Leicester, Leicester, UK;

<sup>12</sup> Primary Health Care Center Raval Sud, Gerència d'Atenció Primària, Institut Català de la Salut, Barcelona, Spain

<sup>13</sup> Departament de Medicina, University of Vic - Central University of Catalonia, Vic, Barcelona, Spain.

1  
2  
3  
4  
5  
6  
7  
8  
9  
10  
11  
12  
13  
14  
15  
16  
17  
18  
19  
20  
21  
22  
23  
24  
25  
26  
27  
28  
29  
30  
31  
32  
33  
34  
35  
36  
37  
38  
39  
40  
41  
42  
43  
44  
45  
46  
47  
48  
49  
50  
51  
52  
53  
54  
55  
56  
57  
58  
59  
60

1

2 \*Corresponding authors

3 Dr Dídac Mauricio

4 Hospital de la Santa Creu i Sant Pau

5 Sant Quintí, 89

6 08041 Barcelona, Spain

7 Telephone No.: +34 935565661; Fax No.: +34 9355602

8 Email: [didacmauricio@gmail.com](mailto:didacmauricio@gmail.com)

9

10 Dr Josep Franch-Nadal

11 Centre d'Atenció Primària Raval Sud,

12 Av. Drassanes, 17-21,

13 08001 Barcelona, Spain

14 Telephone No.: +34 933294495; Fax No.: +34 9344277 63

15 Email: [josep.franch@gmail.com](mailto:josep.franch@gmail.com)

16

17

18 Word count: abstract 301; main text 3734

19 Tables: 1

20 Figures: 2

21 References: 56

22 Appendix: Tables 6; Figures 11;

1  
2  
3 **Abstract:**  
4

5  
6 **Aim:** This study's objective was to assess the risk of severe in-hospital complications of patients  
7  
8  
9 admitted for coronavirus disease (COVID-19) and diabetes mellitus (DM).  
10

11  
12 **Design:** This was a cross-sectional study  
13  
14

15 **Settings:** We used pseudonymised medical records data provided by six general hospitals from the  
16  
17 HM Hospitales group in Spain.  
18

19  
20 **Outcome measures:** Multiple logistic regression analyses were used to identify predictors of  
21  
22 mortality and the composite of mortality or invasive mechanical ventilation (IVM) in the overall  
23  
24 population and stratified for the presence or absence of DM. Spline analysis was conducted in the  
25  
26 whole population to investigate the relationship between glucose levels at admission and outcomes.  
27  
28  
29

30  
31 **Results:** Overall, 1,621 individuals without DM and 448 with DM were identified in the database.  
32  
33 The persons with DM were on average 5.1 years older than those without. The overall in-hospital  
34  
35 mortality was 18.6% (N=301) and was higher among patients with DM than without (26.3% vs  
36  
37 11.3%;  $p < 0.001$ ). DM was an independent predictor of death and death or IVM (OR=2.33, 95% CI:  
38  
39 1.7–3.1 and OR=2.11, 95% CI: 1.6–2.8, respectively;  $p < 0.001$ ). In subjects with DM, the only variables  
40  
41 independently predicting both outcomes were age >65 years, male gender, and pre-existing CKD.  
42  
43 We observed a non-linear relationship between blood glucose levels at admission and the risk of in-  
44  
45 hospital mortality and death or IVM. The highest predicted probability for each outcome (near 50%)  
46  
47 was at random glucose of around 550 mg/dL (30.6 mmol/L), and the risks flattened above this value.  
48  
49  
50

51  
52 **Conclusion:** The results confirm the high burden associated with DM in patients hospitalised with  
53  
54 COVID-19 infection, particularly among males, the elderly, and those with impaired kidney  
55  
56 function. Moreover, hyperglycaemia on admission is a strong predictor of poor outcomes,  
57  
58  
59  
60

1  
2  
3 1 suggesting that its optimisation in a personalised manner could help to improve the outcomes  
4  
5 2  
6 during the hospital stay.  
7

8  
9 3 **Keywords:** COVID-19, Diabetes, Hyperglycaemia, In-hospital mortality, Mechanical ventilation  
10

11 4

12  
13 5 **Strengths and limitations of this study**  
14

- 15  
16 6
- 17 • A major strength of our study is the thorough methodological approach to analyse the risk  
18 of in-hospital COVID-19-related complications based on the presence of DM or overt  
19 7  
20 hyperglycaemia.  
21 8
  - 22 • We were limited by not having access to the patient's medical history prior to admission  
23 and few registers for some important variables for diabetes (such as Hb1Ac) and no data on  
24 9  
25 weight or BMI (only the presence of obesity).  
26 10
  - 27 • The selection of subjects with DM was made based on a proxy algorithm (including DM  
28 11  
29 diagnosis during the hospital stay, antidiabetic treatment, and HbA1c and blood glucose  
30 12  
31 levels at admission.  
32 13
  - 33 • We used random blood glucose on admission for the spline analyses, thus preventing the  
34 14  
35 distinction between stress-related hyperglycaemia and uncontrolled pre-existing DM.  
36 15  
37  
38  
39  
40 16  
41  
42  
43  
44  
45 17
- 46  
47  
48  
49  
50  
51  
52  
53  
54  
55  
56  
57  
58  
59  
60

## 1. Introduction

On the 30<sup>th</sup> January 2020, the World Health Organization (WHO) declared the outbreak of the novel SARS-CoV-2 coronavirus a public health emergency of international importance. A few days later, the respiratory disease caused by SARS-CoV-2 was officially named COVID-19 (Corona Virus Infectious Disease 2019) [1, 2]. The first positive diagnosed person in Spain was confirmed on 31<sup>st</sup> January 2020, in the island of La Gomera [3]. The median age of hospitalised patients infected with SARS-CoV-2 is 46.2 years, men comprise about 60%, and the average incubation period is 5.7 days [4]. As of 8<sup>th</sup> February 2021, approximately 3 million persons have been infected with SARS-CoV-2 in Spain since the start of the COVID-19 pandemic, and 62,295 persons have died.

Several meta-analyses have reported that the most severe and fatal cases of COVID-19 occur among the elderly and in patients with underlying comorbidities [5-7]. Indeed, those with two or more concomitant diseases have a significantly higher risk of admission to an intensive care unit (ICU), invasive ventilation, or death compared to those with a single concomitant disease or without comorbidities [8]. The most prevalent comorbidities associated with increased COVID-19-related morbidity and mortality are the presence of diabetes, cardiovascular diseases (CVDs), chronic lung and kidney disease, hypertension, cancer, obesity, and DM [5-7].

Previous studies have reported that people with DM are prone to new infections and recurrence, particularly influenza and pneumonia, due to impaired defences and disease complications [8-11]. Although the estimated prevalence of DM in COVID-19 infected patients varies greatly by geographical region, it is considered similar to DM prevalence in the general population, thus not representing a risk factor for infection [12]. However, the prevalence of diabetes among COVID-19 hospitalised subjects is higher than the overall diabetes prevalence [12, 13]. A study conducted in England found that a third of in-hospital deaths occurred in people with type 2 DM and that these patients had greater odds of COVID-19-related in-hospital death than those without DM [14]. This observation has been confirmed in a meta-analysis showing that DM is



1 associated with a 2-fold higher chance of dying from COVID-19 [15], and a second one reporting  
2 that patients with pre-existing DM have a 3-fold greater risk of in-hospital mortality [16].  
3  
4 In Spain, DM is a highly prevalent disease in people over 18 years of age (13.8% of the population)  
5 [17]. Given the high prevalence of DM and the additional challenging scenario that COVID-19  
6 poses to the health care professionals in this particular population, it is crucial to accumulate and  
7 share information and data from different countries and regions [18]. Following this notion, the  
8 main objective of this study was to assess the risk of in-hospital COVID-19-related complications  
9 based on the presence of DM or overt hyperglycaemia at admission in Spain.

## 1 2. Methods

### 2 2.1 Study design and settings

3 This was a cross-sectional study in hospitalized individuals infected with SARS-CoV-2, stratified by  
4 presence or absence of DM. Data were obtained from pseudonymized electronic health records  
5 provided by six general hospitals from HM Hospitales group (Spain). The database included  
6 retrospective information related to, medical history (prior admissions, diagnoses and treatment)  
7 and current admission data (procedures' codes, prescribed medications, vital signs, and laboratory  
8 parameters) from 2,310 subjects with a hospital admission between the 27<sup>th</sup> January 2020 and the  
9 24<sup>th</sup> April 2020. Subjects were followed from admission to hospital discharge or death.

10 The study was approved by the Ethics Committee of the Primary Health Care University Research  
11 Institute (IDIAP) Jordi Gol, Barcelona (approval number: 20/089-PCV).

### 12 2.2 Inclusion and Exclusion Criteria

13 The study enrolled people older than 18 years with microbiologically proven SARS-CoV-2 infection  
14 by reverse transcription polymerase chain reaction (RT-PCR). Those with DM were identified in the  
15 database if they: 1) had any ICD-10 (International Statistical Classification of Diseases) diagnostic  
16 code for type 1 or type 2 DM (i.e., E.10 and E11), 2) were on treatment with antidiabetic drugs, 3)  
17 had a register of insulin use in the first 24 hours since admission, or 4) had a glycosylated  
18 hemoglobin (HbA1c) value  $\geq 6,5\%$  (48 mmol/mol) or baseline blood glucose (BG) values  $\geq 200$  mg/dL  
19 (11.1 mmol/L).

### 20 2.3 Study Variables

21 The following baseline variables were collected: age and sex; SARS-CoV-2 diagnosis (positive RT-  
22 PCR); comorbidities (i.e., hypertension, hyperlipidaemia, obesity [BMI  $\geq 30$  kg/m<sup>2</sup>], CVD, heart  
23 failure, cerebrovascular diseases, ischemic heart disease, chronic renal disease, chronic obstructive

1 pulmonary disease [COPD], asthma, mental disorders, and cancer); blood laboratory parameters  
2 (i.e., HbA<sub>1c</sub>, BG, electrolytes, renal function, liver function, haematology and coagulation,  
3 inflammation markers, and gas tests); clinical parameters (i.e., systolic and diastolic blood pressure,  
4 heart rate, and temperature), and concomitant medications (i.e., baseline insulins, systemic  
5 corticosteroids, antimicrobials, anticoagulants and antiplatelet agents, and antihypertensive and  
6 lipid-lowering drugs).

7 As events or complications during hospital stay, we considered the following variables: death,  
8 acute respiratory distress syndrome (ARDS), pulmonary thrombosis, neurologic complications,  
9 thrombotic complications, admission to ICU, and invasive mechanical ventilation (IMV). The  
10 composite primary outcome was defined as death or IMV.

#### 11 *2.4 Statistical Methods*

12 The demographic and clinical characteristics of the two groups of hospitalized patients (i.e., with or  
13 without DM) were compared and summarized at the quantitative (minimum, maximum, median,  
14 first and third quartile, mean, and standard deviation ( $\pm$ SD) or categorical level (frequency, number  
15 and %).

16 The association between the study outcomes (i.e., mortality and mortality or mechanical  
17 ventilation) and DM was performed using logistic regression analyses adjusted for sex, age, and  
18 associated risk factors. Several models of interest were tested, namely with the sequential inclusion  
19 of different covariates and the estimated differences expressed as odds ratio (OR) and their  
20 respective 95% confidence intervals (CI). To analyse the nonlinear relationship of random blood  
21 glucose levels on admission with the two study outcomes, we used an adjusted semi-parametric  
22 model (generalized additive model [GAM]) calculating the spline curves with two degrees of  
23 freedom (knots) using the mgcv package in R, version 1.8-31[19] with adjustment for potential

1 confounders. Data management and statistical analyses were performed using the R statistical  
2 software version 3.6.1 (<https://www.r-project.org/>).

### 3 *2.5 Patient and Public Involvement*

4 Patients or the public were not involved in the design, or conduct, or reporting, or dissemination  
5 plans of our research.

## 6 **3. Results**

### 7 *3.1. Baseline Characteristics*

8 Out of the 2,306 subjects admitted to hospital within the timelines, 2,069 were older than 18 years  
9 and had a positive diagnostic test for SARS-CoV-2 (**Supplementary Figure 1**). Among them, 448  
10 (21.7%) were identified as having DM and 1,621(78.3%) without DM (non-DM group). The  
11 characteristics of the two populations at hospital admission are shown in **Table 1**. Subjects with DM  
12 were on average 5.1 years older than those in the non-DM group and more frequently male (67.9%  
13 *vs.* 58.6%). Moreover, individuals in the DM group had a poor comorbidity profile, with higher  
14 frequency of all assessed prior conditions except for cerebrovascular diseases and asthma.

15 Regarding laboratory parameters on admission (**Supplementary Table 1**), the DM group had  
16 slightly lower estimated glomerular filtration rates (eGFR) ( $73.5 \pm 26.5$  mL/min/1.73 m<sup>2</sup> *vs.*  $81.2 \pm 23.9$   
17 mL/min/1.73 m<sup>2</sup>;  $p < 0.001$ ) and higher levels of serum creatinine ( $1.09 \pm 0.72$  mg/dL *vs.*  $0.94 \pm 0.51$   
18 mg/dL;  $p < 0.001$ ) than the non-DM group. Regarding markers of inflammation and infection, we  
19 observed higher levels of C-reactive protein and procalcitonin in the DM group ( $97.1 \pm 107$  mg/L *vs.*  
20  $75.9 \pm 82.5$  mg/L and  $0.66 \pm 1.30$  mg/L *vs.*  $0.39 \pm 1.30$  mg/L, respectively;  $p < 0.001$ ). We also observed  
21 higher levels of D-dimer, a marker of endothelial and coagulation dysfunction in the DM group  
22 ( $3990 \pm 10800$  ng/mL *vs.*  $2340 \pm 6720$  ng/mL, respectively).

### 23 *3.2 Events and complications during in-hospital stay*

1 A total of 301 (14.5%) subjects positive for SARS-CoV-2 had in-hospital death, 118 (26.3%) out of 448  
2 in the DM group and 183 (11.3%) out of 1621 in the non-DM group ( $p<0.001$ ; **Figure 1**). All studied  
3 events, except pulmonary embolism and thrombotic or neurologic complications, were significantly  
4 more frequent among patients with than without DM (**Figure 1**). The most frequent outcome was  
5 the composite of death or IMV (31% in the DM group *vs.* 14% in the non-DM group; **Figure 1**)  
6 followed by death (26.3% *vs.* 11.3%), admission to ICU (21% *vs.* 6.9%), IMV (10.7% *vs.* 4.2%), and  
7 ARDS (3.8% *vs.* 1.5%).

8 The frequency of events by group and age showed that, in both subjects with and without DM,  
9 death and the composite of death or IMV were significantly more frequent among those >65 years  
10 (**Supplementary Figure 2**). In contrast, the proportion of subjects needing IVM and ICU admission  
11 was significantly higher among those  $\leq 65$  years and DM, while age did not make any difference for  
12 those without DM. When stratifying the results by gender, only admission to ICU was significantly  
13 more frequent among female subjects with DM, while for all the other outcomes, we did not  
14 observe gender differences (**Supplementary Figure 1**).

### 15 3.3. Baseline demographic and clinical characteristics predicting in-hospital death and death or IMV

16 For the overall hospitalised population, the demographic characteristics that significantly predicted  
17 mortality were male sex and older age (OR=1.98, 95% CI=1.2–3.3 and OR=1.10, 95% CI=1.08– 1.11,  
18 respectively) (**Figure 2; Supplementary Table 2**). The comorbidities independently associated with  
19 increased odds of death were DM (OR=2.33, 95% CI=1.7–3.1), CKD (OR=2.14, 95% CI=1.2–3.7), and  
20 COPD (OR=1.72, 95% CI=1.1–2.8).

21 When considering the composite outcome of death or IMV, the same variables that predicted death  
22 (i.e., age, sex, diabetes, CKD, and COPD) were identified as increasing the risk. In addition, obesity  
23 emerged as an independent predictor (OR=1.98, 95% CI=1.5–2.7) (**Figure 2, Supplementary Table**  
24 **2**).

1 The multiple logistic regression models were repeated to rule out the potential interaction of DM  
2 with different clinical conditions (i.e., obesity, hyperlipidemia, obesity and hyperlipidemia, HF,  
3 CKD, and COPD) for the in-hospital death outcome. The results showed none of these conditions  
4 affected the relationship between the risk of death and DM (**Supplementary Table 3**).

#### 5 *3.4. Factors predicting hospital death and death or IMV by comorbid diabetes*

6 A sub-analysis was done separately for subjects with or without DM. In the DM subgroup, the only  
7 variables independently predicting the risk of both mortality and death or IVM were male sex,  
8 older age, and CKD (**Figure 3A** and **Supplementary Table 4** and **5**). In contrast, in subjects without  
9 DM, besides the above variables, the odds of death were also increased among subjects with CVD  
10 (OR=1.94, 95% CI=1.03– 3.7), and the odds of death or IVM among those with obesity or COPD  
11 (OR=2.96, 95% CI=1.7–5.3 and OR=2.30, 95% CI= 1.4 – 3.8, respectively) (**Figure 3B** and  
12 **Supplementary Table 4** and **5**).

#### 13 *3.5. Factors predicting hospital death and death or IMV by glucose levels at admission*

14 We used non-parametric logistic regression models to assess whether there was a relationship  
15 between random BG on admission and the risk of mortality (and death or IMV). We observed a  
16 marked non-linearity in the effect of BG on admission in the risk of both outcomes (**Figure 4A** and  
17 **4B** and **Supplementary Table 6**). While the risk was increased among subjects with high random  
18 BG levels on admission, the magnitudes of the predicted mortality differed depending on the  
19 baseline values, with a large increase in the log-odds of death or IVM with values up to 200 mg/dL  
20 (11.1 mmol/L) and smaller increases above this level. The prediction models (**Figure 5A** and **5B**)  
21 showed that the highest predicted probability of death (near 50%) was at around 550 mg/dL (30.6  
22 mmol/L) and, above this value, the mortality risk flattened. Finally, the multivariate model showed  
23 that beside glucose at admission male sex, older age, CKD, and COPD were predictive of in-

1 hospital death (**Supplementary Table 6**). These variables were predictors of death or IMV too, but  
2 obesity was an additional risk factor (**Supplementary Table 6**).

#### 3 **4. Discussion**

4 Data from this cross-sectional study showed that the COVID-19 related in-hospital death rate was  
5 higher among subjects with than without DM. Moreover, DM was independently associated with  
6 the risk of in-hospital case fatality and the composite outcome death or IMV. In the DM subgroup,  
7 both outcomes were predicted by older age, male sex, and pre-existing CKD. Finally, we observed a  
8 non-linear relationship between BG levels on admission and the probability of death and death or  
9 IMV in the overall inpatient population.

10 Diabetes is more frequent among subjects with COVID-19 needing hospital admission than those  
11 that do not, with prevalence ranging between 8% and 37% depending on the region [12]. Indeed,  
12 while the prevalence of DM in Spain has been estimated to be 13.8% of the general population, DM  
13 was present in 21.7% of the hospitalised subjects in our study. This figure is in line with the 18.9%  
14 prevalence reported in a retrospective cohort registry involving 109 hospitals in Spain [20]. It also  
15 concurs with the 16.7% recently published for the first COVID-19 wave by the working group for  
16 the surveillance and control of COVID-19 in Spain [21]. It is as well within the DM prevalence range  
17 reported by a meta-analysis of international studies (mean 13.4%, ranging between 7.2% and 21.3%)  
18 [22].

19 In the overall population, the in-hospital mortality rate was 14.5%, which is within the range of  
20 7.2%-25.6% reported in available studies conducted in Spain [23-25]. This wide variation of case  
21 fatality between studies and centres has been observed worldwide, with rates varying widely  
22 between 4% and 60.5% and large differences even within the same country or region [7]. As for DM  
23 subjects, about a third (26.3%) of them died during the hospital stay in our study, which is high  
24 compared to the 20.4% reported by another Spanish study [20] and also higher than the one found

1 by one French and two Chinese studies (20.4%, 10.6%, and 8.0%-14.5%, respectively) [26-28]. In  
2 contrast, our rate was lower than this outcome in a population-based study from the UK in 23,804  
3 COVID-19 patients with DM, where in-hospital deaths occurred in 31.4% of T2DM individuals [29].  
4 Differences between studies and centres could be attributed to different treatment guidelines,  
5 manners of identifying individuals with diabetes, and different proportions of DM patients with  
6 severe *vs.* non-severe disease. Indeed, COVID-19 patients with DM are more severely ill at initial  
7 presentation and, when in hospital, they have a 2-fold higher risk of severe infection than those  
8 without DM [15]. In turn, the death rate in DM patients with a severe illness can be up to 3-fold  
9 higher than this of patients with a non-severe course [12, 15, 22]. Different meta-analyses have  
10 reported that higher mean age and male sex among infected with SARS-CoV-2 are associated with a  
11 more severe infection and higher fatality than those with the non-severe disease [11, 27, 30]. In the  
12 same line, studies assessing the phenotypic characteristics of COVID-19 patients with pre-existing  
13 DM have found that those with severe infection were older, had more comorbidities (i.e.,  
14 cerebrovascular disease, CVD, hypertension, and COPD), and increased values of inflammation  
15 and endothelial and coagulation dysfunction markers (e.g., D-dimer, procalcitonin, and  
16 thrombocytopenia) than those without DM [26-28,31,32]. Our study confirms these findings, as the  
17 proportion of severe SARS-CoV-2 cases (e.g., requiring IVM or ICU admission) in the DM  
18 population was higher. They were more frequently male and over 65 years, had more comorbid  
19 conditions, and higher levels of inflammatory and endothelial and coagulation dysfunction markers  
20 than non-DM patients on admission.

21 Different meta-analyses have identified CKD as a risk factor for severity and in-hospital death in  
22 SARS-CoV-2 patients [7, 25, 22, 33]. Moreover, a recent study conducted in Danish hospital-  
23 diagnosed COVID-19 patients reported that kidney insufficiency was independently associated  
24 with progressive risk of severe disease or death [34]. Although it is difficult to distinguish whether  
25 poor outcomes are linked to acute kidney injury (AKI) developed during the course of the disease



1 or to pre-existing CKD [34], a study conducted in Spain showed that patients with either increased  
2 creatinine on admission, previous CKD, or developing AKI, had a higher risk of in-hospital death  
3 than those with normal creatinine on admission [35]. Of note, the authors found that older age and  
4 diabetes, but not other comorbidities, were associated with in-hospital death [35]. Finally, a study  
5 conducted in Mexico reported that patients with DM and CKD had a 2-fold higher rate of  
6 intubation, 56% higher ICU admission, and 21% excess probability of case-fatality once admitted  
7 than subjects with CKD alone [36]. These findings would be in line with those of our study, where  
8 patients with DM had significantly higher creatinine on admission, lower eGFR, and more  
9 frequently pre-existing CKD than non-DM subjects. Besides, CKD was the only comorbid condition  
10 increasing the odds (three-fold increase) of in-hospital death (and death or IMV) among the DM  
11 cohort after adjusting for age, sex, and confounding variables.

12 A recent dose-response meta-analysis reported that high admission fasting blood glucose (FBG)  
13 levels are significantly associated with COVID-19 severity, mortality, and poor outcome regardless  
14 of pre-existing DM [37]. Moreover, the results demonstrated a non-linear relationship between  
15 admission FBG level and infection severity [37]. These results confirm previous observations that  
16 FBG on admission and the odds of being admitted to the ICU follow a logarithmic association, with  
17 different magnitudes of risk depending on the baseline level [38]. Indeed, small FBG increases  
18 across the normal range were associated with a large increase in ICU admission risk, while  
19 equivalent increases in the high glucose range lead to a much lower increase in the risk. In our  
20 study, we used splines as a scientific and preferable alternative to the categorization of BG levels.  
21 We add to the literature that, besides the previously reported effect of hyperglycaemia on the risk of  
22 COVID-19 severity and ICU admission, BG has a non-linear relationship with case fatality and the  
23 risk of death or IVM. Of note, a recent report also identified glycaemic fluctuation as independently  
24 associated with poor prognosis and mortality in COVID-19 hospitalized patients [39]. In the same  
25 vein, a study on ICU patients showed that less time spent in range (70–150 mg/dL; 3.9–8.3 mmol/L)

1 was associated with increased utilization of a ventilator, prolonged mechanical ventilation, and  
2 increased mortality [40]. Most importantly, a spline analysis of glucose levels in DM patients with  
3 continuous glucose monitoring showed a non-linear relationship between time spent above range  
4 and glycaemic variability with the increased likelihood of composite adverse COVID-19 outcomes  
5 (need for ICU admission, mechanical ventilation, or critical illness) [41]. Therefore, it is possible that  
6 the association of high BG on admission with death or IMV observed in our study was as well  
7 accompanied or reflecting glycaemic variability and less time spent in range.

#### 8 *4.1 Limitations of this study*

9 The findings of this study must be interpreted with caution and a number of limitations should be  
10 borne in mind. Firstly, we had limited data for COVID19 infected persons. For instance, we did not  
11 have access to the patient's medical history prior to admission; so that the possibility exists that  
12 some important medical conditions were not included in the emergency room medical report and  
13 therefore not included in the analysis. Secondly, we had very few registers for some important  
14 variables for diabetes, such as Hb1Ac (only data from 36 patients) and no data on weight or BMI  
15 (only the presence of obesity). Thirdly, the selection of subjects with DM was made based on a  
16 proxy algorithm (including DM diagnosis during the hospital stay, antidiabetic treatment, and  
17 HbA<sub>1c</sub> and blood glucose levels), which could have introduced selection or referral bias, potentially  
18 leading to an inaccurate estimation of DM prevalence. Fourthly, and inherent to data coming from  
19 hospital medical records, missing values could have reduced the statistical power of the study or  
20 produced biased estimates. Fifthly, we used random BG on admission for the spline analyses, thus  
21 preventing the distinction between stress-related hyperglycaemia and uncontrolled pre-existing  
22 DM. This also prevented the analysis of time in range or BG variability, both of them linked to  
23 increased severity, case fatality, and poor COVID-19 outcomes [39-41]. Lastly, the study period  
24 coincides with the height of the pandemic first wave in Spain, when there was shortage of  
25 ventilators and intensive care beds. By then, age was the deciding factor on whether or not someone

1  
2  
3  
4  
5  
6  
7  
8  
9  
10  
11  
12  
13  
14  
15  
16  
17  
18  
19  
20  
21  
22  
23  
24  
25  
26  
27  
28  
29  
30  
31  
32  
33  
34  
35  
36  
37  
38  
39  
40  
41  
42  
43  
44  
45  
46  
47  
48  
49  
50  
51  
52  
53  
54  
55  
56  
57  
58  
59  
60

1 received potentially life-saving ICU care. This might be reflected in our results, where in-hospital  
2 death was more frequent among those over 65 years, but ICU admission was more frequent among  
3 those  $\leq 65$  years.

For peer review only

## 5. Conclusions

The results in our study confirm the high burden associated with DM in patients hospitalised because of SARS-CoV-2 infection. Comorbid DM poses a challenge to the health professionals and system because it is associated with severe disease, higher ICU admission rates, IMV, and ultimately death, particularly among the elderly. The non-linear relationship of hyperglycaemia at admission with increased odds of death and IVM suggests that optimizing glycaemic control during the hospital stay could help to reduce in-hospital death and the composite death/IVM. Besides, out-of-hospital care should be a priority to reduce or prevent uncontrolled glycaemia among those with DM as it could potentially help reduce poor outcomes when hospitalisation is needed.

1  
2  
3  
4  
5  
6  
7  
8  
9  
10  
11  
12  
13  
14  
15  
16  
17  
18  
19  
20  
21  
22  
23  
24  
25  
26  
27  
28  
29  
30  
31  
32  
33  
34  
35  
36  
37  
38  
39  
40  
41  
42  
43  
44  
45  
46  
47  
48  
49  
50  
51  
52  
53  
54  
55  
56  
57  
58  
59  
60

1 **Author Contributions:** Conceptualization, E.O, J.F-N, R.C,M.M-C, B.V, K.K, D.M.; methodology, E.O,J.F-N,  
2 R.C,M.M-C, B.V, K.K,D.M.; formal analysis, R.P-T.; resources and data curation, R.P-T and B.V.; writing—  
3 original draft preparation, B.V and M.G.; writing— review and editing, E.O,J.F-N, R.C,M.M-C,M.G, X.C-C, E.C,  
4 B.V, K.K,D.M and P.D.; supervision: D.M, R.C and J.F-N.; project administration: B.V.

5 **Acknowledgements:** COVID DATA SAVE LIVES -Hospitales HM for providing database. CIBER of Diabetes  
6 and Associated Metabolic Diseases (CIBERDEM) and CIBER of physiopathology of obesity and Nutrition  
7 (CIBEROBN) are initiatives from Instituto de Salud Carlos III, Madrid, Spain. The authors acknowledge Amanda  
8 Prowse (Lochside Medical communications Ltd.) for providing support in the paper editing. KK is supported  
9 by the National Institute for Health Research (NIHR) Applied Research Collaboration East Midlands (ARC EM)  
10 and the NIHR Leicester Biomedical Research Centre (BRC).

11 **Funding:** This study was supported by Primary Care Diabetes Europe grant (grant number FEr20/0020)

12 **Data sharing:** The data controller for Hospitales HM does not allow the sharing of raw data. Statistical codes are  
13 available upon request from the corresponding authors (J.F.-N or D.M).

14 **Conflicts of interest:** The funders had no role in the design of the study; in the collection, analyses, or  
15 interpretation of data; in the writing of the manuscript, or in the decision to publish the results.

16 E.O. has received advisory and or speaking fees from Astra-Zeneca, Boehringer Ingelheim, Lilly, MSD, Novo  
17 Nordisk, Sanofi, and Amgen; he has received research grants to the institution from MSD and Amgen.

18 R.C. has received advisory and/or speaking fees from Abbott, Ascensia, Lilly, MSD, Novo Nordisk and Sanofi.

19 M. M-C. has received advisory honorarium from Astra-Zeneca, Bayer, Boehringer Ingelheim, GSK, Lilly, MSD,  
20 Novartis, Novo Nordisk, and Sanofi; he has received speaker honorarium from Astra-Zeneca, Bayer, Boehringer  
21 Ingelheim, GSK, Lilly, Menarini, MSD, Novartis, Novo Nordisk, and Sanofi; he has received research grants to  
22 the institution from Astra-Zeneca, GSK, Lilly, MSD, Novartis, Novo Nordisk, and Sanofi.

23 J. F-N has received advisory and or speaking fees from Astra-Zeneca, Ascensia, Boehringer Ingelheim, GSK,  
24 Lilly, MSD, Novartis, Novo Nordisk, and Sanofi; he has received research grants to the institution from Astra-  
25 Zeneca, GSK, Lilly, MSD, Novartis, Novo Nordisk, Sanofi, and Boehringer.

26 KK has acted as a consultant, speaker or received grants for investigator-initiated studies for Astra Zeneca,  
27 Novartis, Novo Nordisk, Sanofi-Aventis, Lilly and Merck Sharp & Dohme, Boehringer Ingelheim, Bayer, Berlin-  
28 Chemie AG / Menarini Group, Janssen, and Napp

29 D. M. has received advisory and/or speaking fees from Astra-Zeneca, Ascensia, Boehringer Ingelheim, GSK,  
30 Lilly, MSD, Novartis, Novo Nordisk, and Sanofi; he has received research grants to the institution from Astra-  
31 Zeneca, GSK, Lilly, MSD, Novartis, Novo Nordisk, Sanofi, and Boehringer.

32 P. D. has received lecture and Advisory Board fees from Gilead Sciences, Roche, Merck, Sharp & Dohme, ViiV  
33 Healthcare, Janssen & Cilag, Theratechnologies, Boehringer Ingelheim, and Ferrer International. PD has received  
34 research grants from Gilead Sciences, ViiV Healthcare, GSK, Janssen & Cilag, and Boehringer Ingelheim.

35 B. V, X.C-C, J.R, R.P-T, M.G, and E.C. have no conflict of interest to declare.

36

## References

1. World Health Organization. 15-Novel Coronavirus(2019-nCoV). WHO Bull 2020; 1–7.
2. Agència de Salut Pública de Catalunya (ASPCAT). Informe tècnic resum dels casos de covid-19 a Catalunya, [http://salutpublica.gencat.cat/web/.content/minisite/aspcat/butlletins/vigilanciaaspcat/2020/45/INFORME-TECNIC-3-COVID-19\\_020420.pdf](http://salutpublica.gencat.cat/web/.content/minisite/aspcat/butlletins/vigilanciaaspcat/2020/45/INFORME-TECNIC-3-COVID-19_020420.pdf) (2020).
3. Linde, Pablo (1 de febrero de 2020). «Sanidad confirma en La Gomera el primer caso de coronavirus en España». El País. ISSN 1134-6582. Consultado el 10 de marzo de 2020. Available from: [https://elpais.com/sociedad/2020/01/31/actualidad/1580509404\\_469734.htm](https://elpais.com/sociedad/2020/01/31/actualidad/1580509404_469734.htm)
4. Muniyappa R, Gubbi S. COVID-19 pandemic, coronaviruses, and diabetes mellitus. *American Journal of Physiology-Endocrinology and Metabolism* 2020;318(5):E736-E741.
5. Zhou Y, Yang Q, Chi J, et al. Comorbidities and the risk of severe or fatal outcomes associated with coronavirus disease 2019: A systematic review and meta-analysis. *Int J Infect Dis* 2020; 99: 47–56.
6. Deng G, Yin M, Chen X, et al. Clinical determinants for fatality of 44,672 patients with COVID-19. *Crit Care* 2020; 24: 179.
7. Mesas AE, Cavero-Redondo I, Álvarez-Bueno C, et al. Predictors of in-hospital COVID-19 mortality: A comprehensive systematic review and meta-analysis exploring differences by age, sex and health conditions. *PLoS One* 2020; 15: e0241742.
8. Papazafiropoulou AK, Antonopoulos S. The COVID-19 pandemic and diabetes mellitus. *Archives of Medical Sciences. Atherosclerotic Diseases* 2020;5:e200.
- 9 McDonald HI, Nitsch D, Millett E, Sinclair A, Thomas SL. New estimates of the burden of acute community-acquired infections among older people with diabetes mellitus: a retrospective cohort study using linked electronic health records. *Diabetic Med* 2014;31(5):606-614.
10. Li S, Wang J, Zhang B, Li X, Liu Y. Diabetes mellitus and cause-specific mortality: a population-based study. *Diabetes & metabolism journal* 2019;43(3):319-341.
11. Del Sole F, Farcomeni A, Loffredo L, Carnevale R, Menichelli D, Vicario T, et al. Features of severe COVID-19: A systematic review and meta-analysis. *Eur J Clin Invest* 2020;50:0–1. <https://doi.org/10.1111/eci.13378>.
12. Pugliese G, Vitale M, Resi V, Orsi E. Is diabetes mellitus a risk factor for COroNaVIrus Disease 19 (COVID-19)? *Acta Diabetol* 2020;19. <https://doi.org/10.1007/s00592-020-01586-6>.
13. Peric S, Stulnig TM. Diabetes and COVID-19. *Wien Klin Wochenschr* 2020;132:356–61. doi:10.1007/s00508-020-01672-3
14. Barron E, Bakhai C, Kar P, Weaver A, Bradley D, Ismail H, et al. Associations of type 1 and type 2 diabetes with COVID-19-related mortality in England: a whole-population study. *The Lancet Diabetes & Endocrinology* 2020.
15. Tian W, Jiang W, Yao J, Nicholson CJ, Li RH, Sigurslid HH, et al. Predictors of mortality in hospitalized COVID-19 patients: A systematic review and meta-analysis. *J Med Virol* 2020.

- 1  
2  
3  
4 16. Mantovani A, Byrne CD, Zheng M, Targher G. Diabetes as a risk factor for greater COVID-19  
5 severity and in-hospital death: A meta-analysis of observational studies. *Nutrition, Metabolism and*  
6 *Cardiovascular Diseases* 2020;30(8):1236-1248.
- 7  
8 4 17. Soriguer F, Goday A, Bosch-Comas A, Bordiú E, Calle-Pascual A, Carmena R, et al. Prevalence  
9 of diabetes mellitus and impaired glucose regulation in Spain: the Di@bet.es Study. *Diabetologia*  
10 2012; 55(1):88-93.
- 11  
12 7 18. Caballero AE, Ceriello A, Misra A, et al. COVID-19 in people living with diabetes: An  
13 international consensus. *J Diabetes Complications* 2020; 34: 107671.
- 14  
15 9 19. Wood S (2019) mgcv: mixed GAM computation vehicle with automatic smoothness estimation.  
16 R-package version 1.8–31. <https://CRAN.R-project.org/package=mgcv>
- 17  
18 11 20. Carrasco-Sánchez FJ, López-Carmona MD, Martínez-Marcos FJ, et al. Admission  
19 hyperglycaemia as a predictor of mortality in patients hospitalized with COVID-19 regardless of  
20 diabetes status: data from the Spanish SEMI-COVID-19 Registry. *Ann Med* 2021; 53: 103–116.
- 21  
22  
23 14 21. Borobia A, Carcas A, Arnalich F, et al. A Cohort of Patients with COVID-19 in a Major Teaching  
24 Hospital in Europe. *J Clin Med* 2020; 9: 1733.
- 25  
26 16 22. Spain W group for the surveillance and control of C-19 in, Spain W group for the surveillance  
27 and control of C-19 in, Redondo-Bravo L, et al. The first wave of the COVID-19 pandemic in Spain:  
28 characterisation of cases and risk factors for severe outcomes, as at 27 April 2020. *Eurosurveillance*  
29 2020;25:2001431. doi:10.2807/1560-7917.ES.2020.25.50.2001431
- 30  
31 20 23. Singh AK, Gillies CL, Singh R, et al. Prevalence of co-morbidities and their association with  
32 mortality in patients with <scp>COVID</scp> -19: A systematic review and meta-analysis. *Diabetes,*  
33 *Obes Metab* 2020;22:1915–24. doi:10.1111/dom.14124
- 34  
35  
36 23 24. Rivera-Izquierdo M, del Carmen Valero-Ubierna M, R-delAmo JL, et al. Sociodemographic,  
37 clinical and laboratory factors on admission associated with COVID-19 mortality in hospitalized  
38 patients: A retrospective observational study. *PLoS One* 2020; 15: e0235107.
- 39  
40 26 25. Laguna-Goya R, Utrero-Rico A, Talayero P, et al. IL-6–based mortality risk model for  
41 hospitalized patients with COVID-19. *J Allergy Clin Immunol* 2020; 146: 799-807.e9.
- 42  
43 28 26. Cariou B, Hadjadj S, Wargny M, Pichelin M, Al-Salameh A, Allix I, et al. Phenotypic  
44 characteristics and prognosis of inpatients with COVID-19 and diabetes: the CORONADO study.  
45 *Diabetologia* 2020;63:1500–15. <https://doi.org/10.1007/s00125-020-05180-x>.
- 46  
47 31 27. Li G, Deng Q, Feng J, Li F, Xiong N, He Q. Clinical Characteristics of Diabetic Patients with  
48 COVID-19. *J Diabetes Res* 2020;2020:1652403. <https://doi.org/10.1155/2020/1652403>.
- 49  
50 33 28. Zhu L, She Z-G, Cheng X, et al. Association of Blood Glucose Control and Outcomes in Patients  
51 with COVID-19 and Pre-existing Type 2 Diabetes. *Cell Metab* 2020; 31: 1068-1077.e3.
- 52  
53 35 29. Barron E, Bakhai C, Kar P, Weaver A, Bradley D, Ismail H, et al. Associations of type 1 and type  
54 2 diabetes with COVID-19-related mortality in England: a whole-population study. *Lancet Diabetes*  
55 *Endocrinol* 2020;8:813–22. [https://doi.org/10.1016/S2213-8587\(20\)30272-2](https://doi.org/10.1016/S2213-8587(20)30272-2).
- 56  
57 38 30. Izcovich A, Ragusa MA, Tortosa F, et al. Prognostic factors for severity and mortality in patients  
58 infected with COVID-19: A systematic review. *PLoS One* 2020; 15: e0241955.
- 59  
60

- 1  
2  
3  
4 1 31. Elamari S, Motaib I, Zbiri S, et al. Characteristics and outcomes of diabetic patients infected by  
5 2 the SARS-CoV-2. *Pan Afr Med J*; 37. Epub ahead of print 2020. DOI: 10.11604/pamj.2020.37.32.25192.
- 6  
7 3 32. Yan Y, Yang Y, Wang F, et al. Clinical characteristics and outcomes of patients with severe  
8 4 covid-19 with diabetes. *BMJ Open Diabetes Res Care* 2020; 8: e001343.
- 9  
10 5 33. Tian W, Jiang W, Yao J, et al. Predictors of mortality in hospitalized COVID-19 patients: A  
11 6 systematic review and meta-analysis. *J Med Virol* 2020; 92: 1875–1883.
- 12  
13 7 34. Carlson N, Nelveg-Kristensen K -E., Freese Ballegaard E, et al. Increased vulnerability to  
14 8 COVID-19 in chronic kidney disease. *J Intern Med* 2021; joim.13239.
- 15  
16 9 35. Portolés J, Marques M, López-Sánchez P, et al. Chronic kidney disease and acute kidney injury  
17 10 in the COVID-19 Spanish outbreak. *Nephrol Dial Transplant* 2020; 35: 1353–1361.
- 18  
19 11 36. Leon-Abarca JA, Memon RS, Rehan B, et al. The impact of COVID-19 in diabetic kidney  
20 12 disease and chronic kidney disease: A population-based study. medrxiv. Epub ahead of print 2020.  
21 13 DOI: <https://doi.org/10.1101/2020.09.12.20193235>.
- 22  
23 14 37. Lazarus G, Audrey J, Wangsaputra VK, et al. High admission blood glucose independently  
24 15 predicts poor prognosis in COVID-19 patients: A systematic review and dose-response meta-  
25 16 analysis. *Diabetes Res Clin Pract* 2021; 171: 108561.
- 26  
27 17 38. Alahmad B, Al-Shammari AA, Bennakhi A, et al. Fasting Blood Glucose and COVID-19 Severity:  
28 18 Nonlinearity Matters. *Diabetes Care* 2020; 43: 3113–3116.
- 29  
30 19 39. Chen L, Sun W, Liu Y, et al. Association of Early-Phase In-Hospital Glycemic Fluctuation With  
31 20 Mortality in Adult Patients With Coronavirus Disease 2019. *Diabetes Care* 2021; dc200780.
- 32  
33 21 40. Kapoor R, Timsina LR, Gupta N, et al. Maintaining Blood Glucose Levels in Range (70–150  
34 22 mg/dL) is Difficult in COVID-19 Compared to Non-COVID-19 ICU Patients—A Retrospective  
35 23 Analysis. *J Clin Med* 2020; 9: 3635.
- 36  
37 24 41. Shen Y, Fan X, Zhang L, et al. Thresholds of Glycemia and the Outcomes of COVID-19  
38 25 Complicated With Diabetes: A Retrospective Exploratory Study Using Continuous Glucose  
39 26 Monitoring. *Diabetes Care* 2021; dc201448.
- 40  
41  
42  
43  
44  
45  
46  
47  
48  
49  
50  
51  
52  
53  
54  
55  
56  
57  
58  
59  
60



1 **Table 1.** Baseline characteristics of the studied cohorts at hospital admission

| Characteristic                | DM<br>N=448       | Non_DM<br>N=1621  | p-value |
|-------------------------------|-------------------|-------------------|---------|
| Age, mean (SD), years         | 71.7 (11.9)       | 66.6 (16.3)       | <0.001  |
| Age, median (P25, P75), years | 72.0 (64.0; 80.0) | 67.0 (55.0; 79.0) | <0.001  |
| Gender (male), n (%)          | 304 (67.9)        | 950 (58.6)        | <0.001  |
| Glucose, mean, (SD)           | mg/dL             | 168 (74.4)        | <0.001  |
|                               | mmol/L            | 9.3 (4.1)         |         |
| <b>Comorbidities, n (%)</b>   |                   |                   |         |
| Hypertension                  | 224 (50.0)        | 427 (26.3)        | <0.001  |
| Hyperlipidaemia               | 154 (34.4)        | 255 (15.7)        | <0.001  |
| Obesity                       | 45 (10.0)         | 72 (4.44)         | <0.001  |
| Cardiovascular diseases       | 28 (6.25)         | 49 (3.02)         | 0.002   |
| Heart failure                 | 18 (4.02)         | 33 (2.04)         | 0.026   |
| Cerebrovascular diseases      | 10 (2.23)         | 17 (1.05)         | 0.086   |
| Ischemic heart disease        | 18 (4.02)         | 29 (1.79)         | 0.009   |
| Chronic kidney disease        | 30 (6.70)         | 46 (2.84)         | <0.001  |
| COPD                          | 34 (7.59)         | 78 (4.81)         | 0.029   |
| Asthma                        | 0 (0.00)          | 2 (0.12)          | 1.000   |
| Mental disorders              | 35 (7.81)         | 79 (4.87)         | 0.022   |
| Cancer                        | 36 (8.04)         | 81 (5.00)         | 0.019   |

2 COPD, chronic obstructive pulmonary disease; DM, diabetes mellitus; P25, P75, 25<sup>th</sup> and 75<sup>th</sup> percentile, respectively;  
3 SD, standard deviation

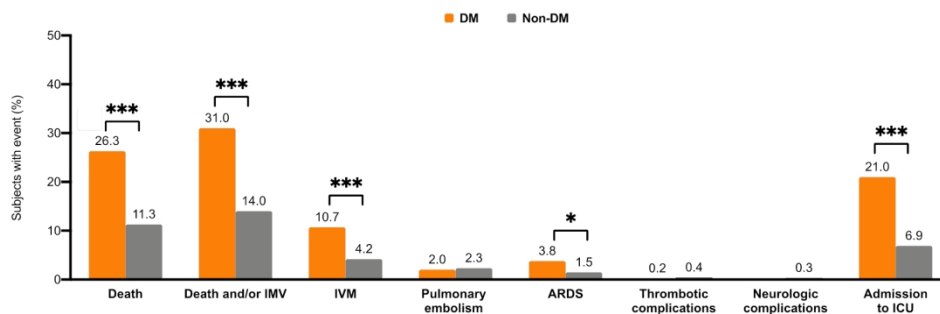

Figure 1. Proportion of events (%) during hospitalization according to the presence of diabetes.

ARDS, acute respiratory distress syndrome; DM, diabetes mellitus; ICU, intensive care unit; IMV, invasive mechanical ventilation. \*\*\* p<0.001; \*\* p<0.01; \* p<0.05

491x163mm (96 x 96 DPI)

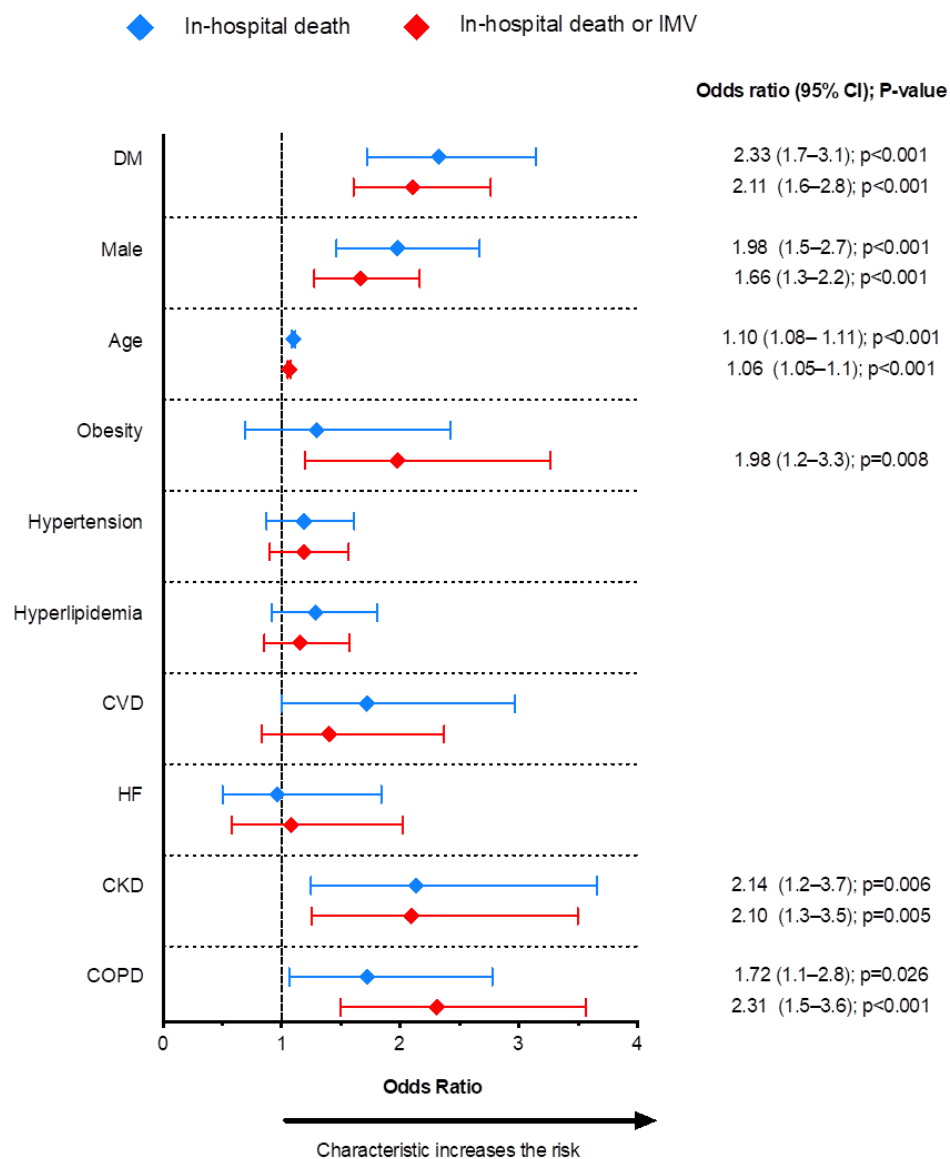

Figure 2. Clinical and demographic variables associated with increased risk of in-hospital death and the composite outcome of death or invasive mechanical ventilation.  
 CKD, chronic kidney disease; COPD, chronic obstructive pulmonary disease; CVD, cardiovascular disease; DM, diabetes mellitus; HF, heart failure; IMV, invasive mechanical ventilation

233x285mm (96 x 96 DPI)

**A. Subjects with diabetes**

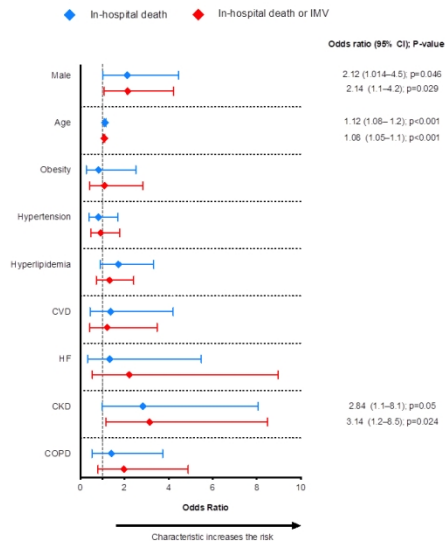

**B. Subjects without diabetes**

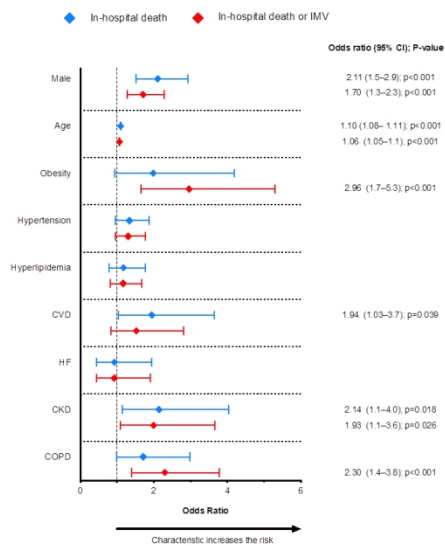

Figure 3. Clinical and demographic variables associated with increased risk of in-hospital death and the composite outcome of death and/or invasive mechanical ventilation in subjects with diabetes (A) and without diabetes (B).

CKD, chronic kidney disease; COPD, chronic obstructive pulmonary disease; CVD, cardiovascular disease; DM, diabetes mellitus; HF, heart failure; IMV, invasive mechanical ventilation

218x505mm (96 x 96 DPI)

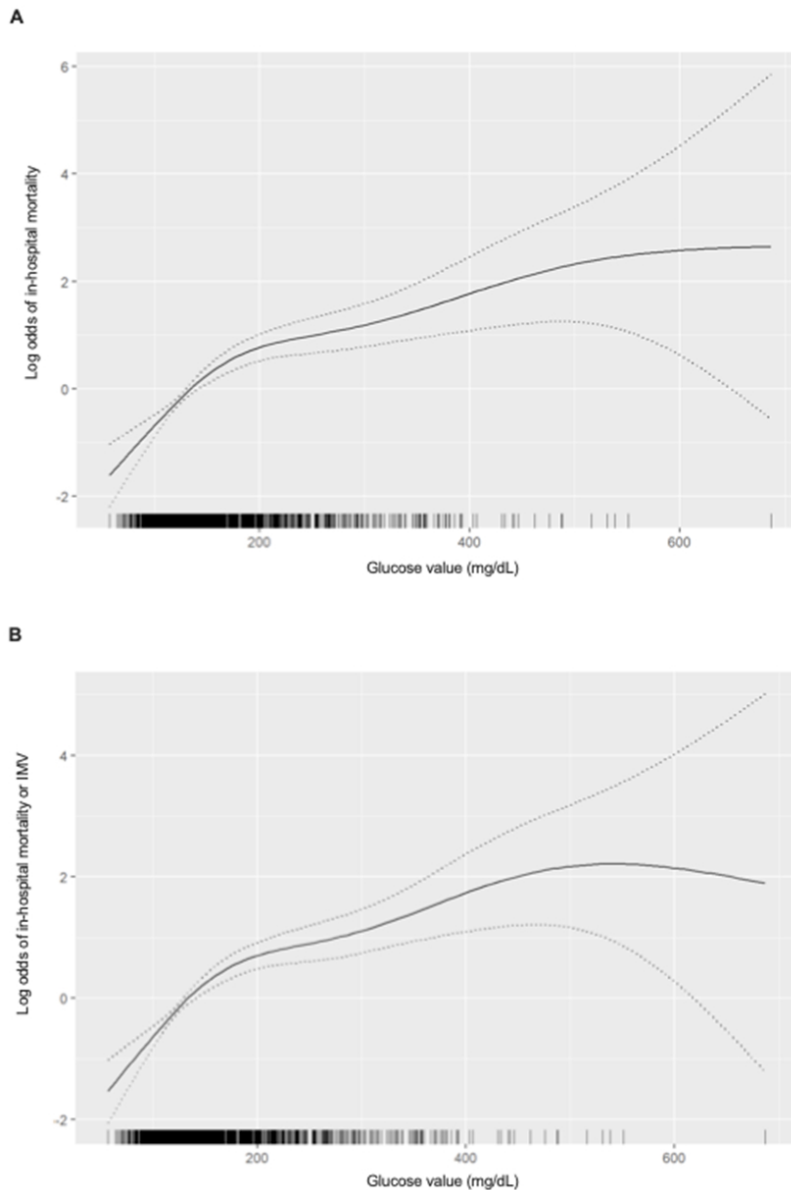

45 Figure 4. Spline plot demonstrating a marked non-linearity in the relationship between plasma random  
46 glucose (mg/dL) levels on admission and the log odds of death (A) and death or invasive mechanical  
47 ventilation (IMV) rate (B). Tick marks above the horizontal axis indicate the values at which the  
48 observations were made. The dotted lines represent the 95% confidence interval. The model was adjusted  
49 for age, sex, obesity, hypertension, hyperlipidaemia, history of CVD, HF, CKD, and COPD.

50 IMV, intensive mechanical ventilation

51  
52 219x323mm (96 x 96 DPI)

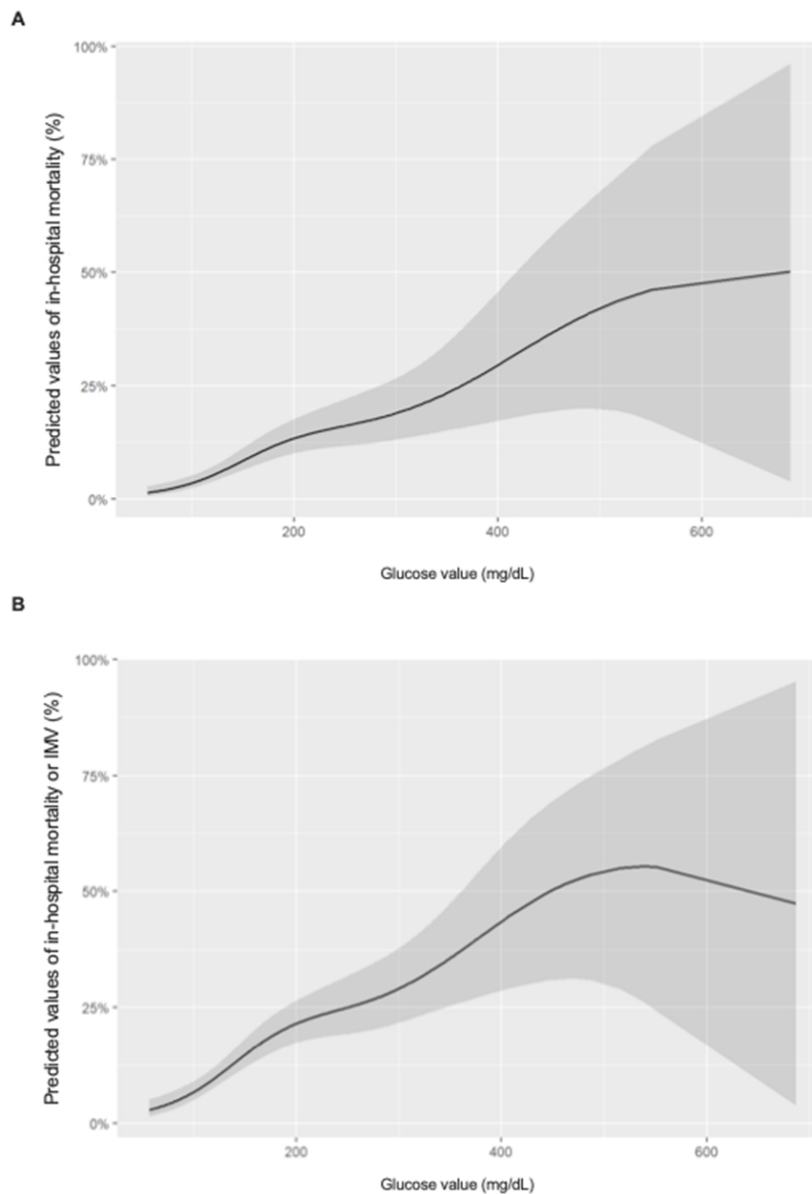

Figure 5. Predicted probability of in-hospital death (A) and death or IMV (B) based on generalized smoothing splines. The shaded area represents the 95% confidence interval. The model was adjusted for age, sex, obesity, hypertension, hyperlipidaemia, history of CVD, HF, CKD, and COPD

IMV, intensive mechanical ventilation

231x333mm (96 x 96 DPI)

## ONLINE-ONLY SUPPLEMENTARY MATERIALS

These supplemental materials have been provided by the authors to give the readers additional information about the study.

# Risk factors for severe outcomes in people with diabetes hospitalized for COVID-19

Emilio Ortega <sup>1,2,3</sup>, Rosa Corcoy <sup>4,5,6</sup>, Mònica Gratacòs<sup>1</sup>, Xavier Cos-Claramunt <sup>1,7</sup>, Manel Mata-Cases <sup>1,8,10</sup>, Ramon Puig-Treserra<sup>1</sup>, Jordi Real <sup>1</sup>, Bogdan Vlacho <sup>1</sup>, Esmeralda Castelblanco <sup>1,8</sup>, Pere Domingo <sup>9</sup>, Kamlesh Khunti <sup>11</sup>, Josep Franch-Nadal <sup>1,8,12\*</sup> and Dídac Mauricio <sup>1,4,8,13\*</sup>

### TABLE OF CONTENTS

|                                |                                                                                                                                                                                                                 | PAGE |
|--------------------------------|-----------------------------------------------------------------------------------------------------------------------------------------------------------------------------------------------------------------|------|
| <b>Supplementary Figure 1</b>  | Flow chart of the patients included in the study                                                                                                                                                                | 2    |
| <b>Supplementary Table 1</b>   | Basal vital signs and laboratory measurements of patients admitted for coronavirus according to the presence of diabetes mellitus                                                                               | 3    |
| <b>Supplementary Figure 2.</b> | Proportion of events (%) during hospitalization according to the presence of diabetes and age group (A) and sex (B).                                                                                            | 5    |
| <b>Supplementary Table 2.</b>  | Clinical characteristics at baseline as predictors of death vs death or invasive mechanical ventilation according to the model with all potential independent variables included                                | 6    |
| <b>Supplementary Table 3.</b>  | Mortality model evaluating diabetes and interactions with other clinical comorbid conditions regarding the outcome of death.                                                                                    | 7    |
| <b>Supplementary Table 4.</b>  | Clinical characteristics at baseline associated with in-hospital death stratified for diabetes status (model 3, namely the model with all demographic and clinical variables included).                         | 8    |
| <b>Supplementary Table 5.</b>  | Clinical characteristics at baseline associated to in-hospital death or mechanical ventilation stratified for diabetes status (model 3, namely the model with all demographic and clinical variables included). | 9    |
| <b>Supplementary Table 6.</b>  | Multivariate model of the association between predictors and the odds of death and death or invasive mechanical ventilation based on the nonlinear glucose curve.                                               | 10   |

Supplementary Figure 1. Flowchart diagram

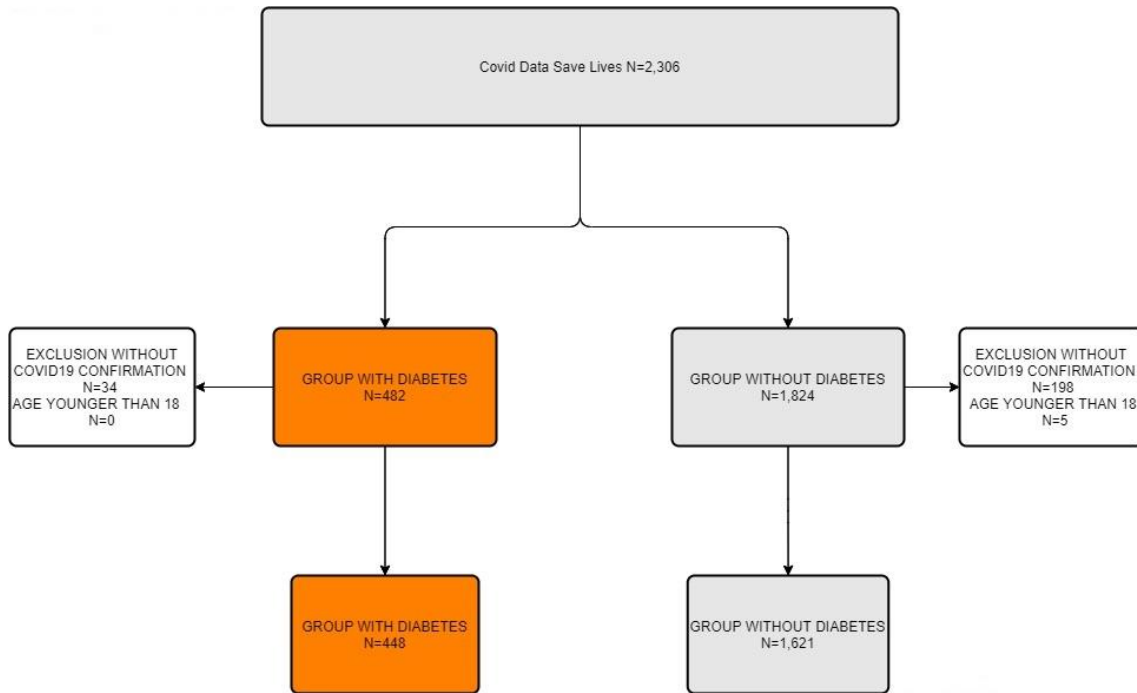

er review only



**Supplementary Table 1.** Basal vital signs and laboratory measurements of patients admitted for coronavirus according to the presence of diabetes mellitus

|                                                                         | With diabetes<br>N=448 | Without diabetes<br>N=1621 | p-value |
|-------------------------------------------------------------------------|------------------------|----------------------------|---------|
| <b>Vital signs</b>                                                      |                        |                            |         |
| Systolic blood pressure, mean, (SD), mmHg                               | 128 (19.7)             | 123 (19.3)                 | 0.037   |
| Diastolic blood pressure, mean, (SD), mmHg                              | 72.0 (12.1)            | 71.1 (12.5)                | 0.501   |
| Heart rate, mean, (SD), bpm                                             | 80.2 (14.7)            | 79.4 (14.9)                | 0.641   |
| Temperature, mean, (SD), °C                                             | 36.5 (0.823)           | 36.5 (0.805)               | 0.086   |
| <b>Basal laboratory measurements</b>                                    |                        |                            |         |
| Glomerular filtration (CKD-EPI), mean, (SD), mL/min/1.73 m <sup>2</sup> | 73.5 (26.5)            | 81.2 (23.9)                | <0.001  |
| Creatinine, mean, (SD), mg/dL                                           | 1.09 (0.716)           | 0.943 (0.510)              | <0.001  |
| Procalcitonin, mean, (SD), ng/mL                                        | 0.661 (1.30)           | 0.387 (1.30)               | <0.001  |
| D-dimer, mean, (SD), ng/mL                                              | 3990 (10800)           | 2340 (6720)                | <0.001  |
| Alkaline phosphatase, mean, (SD), U/L                                   | 78.3 (39.1)            | 78.6 (62.3)                | 0.984   |
| Lactate dehydrogenase, mean, (SD), U/L                                  | 644 (399)              | 575 (311)                  | <0.001  |
| C-reactive protein, mean, (SD), mg/L                                    | 97.1 (107)             | 75.9 (82.5)                | <0.001  |
| Gamma-glutamyl transferase, mean, (SD), U/L                             | 93.8 (135)             | 88.4 (123)                 | 0.804   |
| Aspartate aminotransferase, mean, (SD), U/L                             | 49.6 (165)             | 42.7 (57.8)                | 0.022   |
| Alanine aminotransferase, mean, (SD), U/L                               | 51.7 (136)             | 45.1 (60.6)                | 0.354   |
| Haemoglobin, mean, (SD), g/dL                                           | 13.1 (2.09)            | 13.6 (1.84)                | 0.433   |
| Leucocytes, mean, (SD), x10e3/μL                                        | 8.91 (6.52)            | 7.47 (4.17)                | <0.001  |
| Platelets, mean, (SD), x10e3/μL                                         | 247 (112)              | 250 (116)                  | 0.705   |
| Prothrombin time, mean, (SD), s                                         | 15.6 (15.6)            | 14.8 (10.5)                | 0.076   |
| Monocytes, mean, (SD), %                                                | 7.21 (5.29)            | 8.19 (3.91)                | <0.001  |
| Lymphocytes, mean, (SD), %                                              | 15.6 (10.0)            | 19.0 (10.9)                | <0.001  |
| Neutrophils, mean, (SD), %                                              | 76.1 (13.5)            | 71.8 (13.5)                | <0.001  |
| Phosphorus, mean, (SD), mg/dL                                           | 3.39 (0.971)           | 3.15 (0.731)               | 0.026   |
| Sodium, mean, (SD), mg/dL                                               | 138 (6.41)             | 138 (4.35)                 | 0.537   |
| Calcium, mean, (SD), mg/dL                                              | 8.31 (0.648)           | 8.39 (0.574)               | 0.102   |

|                                                        |             |             |       |
|--------------------------------------------------------|-------------|-------------|-------|
| PCO <sub>2</sub> – pCO <sub>2</sub> , mean, (SD), mmHg | 37.8 (9.95) | 35.8 (7.42) | 0.007 |
| PO <sub>2</sub> – pO <sub>2</sub> , mean, (SD), mmHg   | 73.4 (35.4) | 67.5 (30.9) | 0.216 |
| SO <sub>2</sub> C – Oxigen saturation, mean, (SD), %   | 90.3 (11.4) | 89.1 (13.6) | 0.694 |

For peer review only

**Supplementary Figure 2.** Proportion of events (%) during hospitalization according to the presence of diabetes and age group (A) and sex (B).

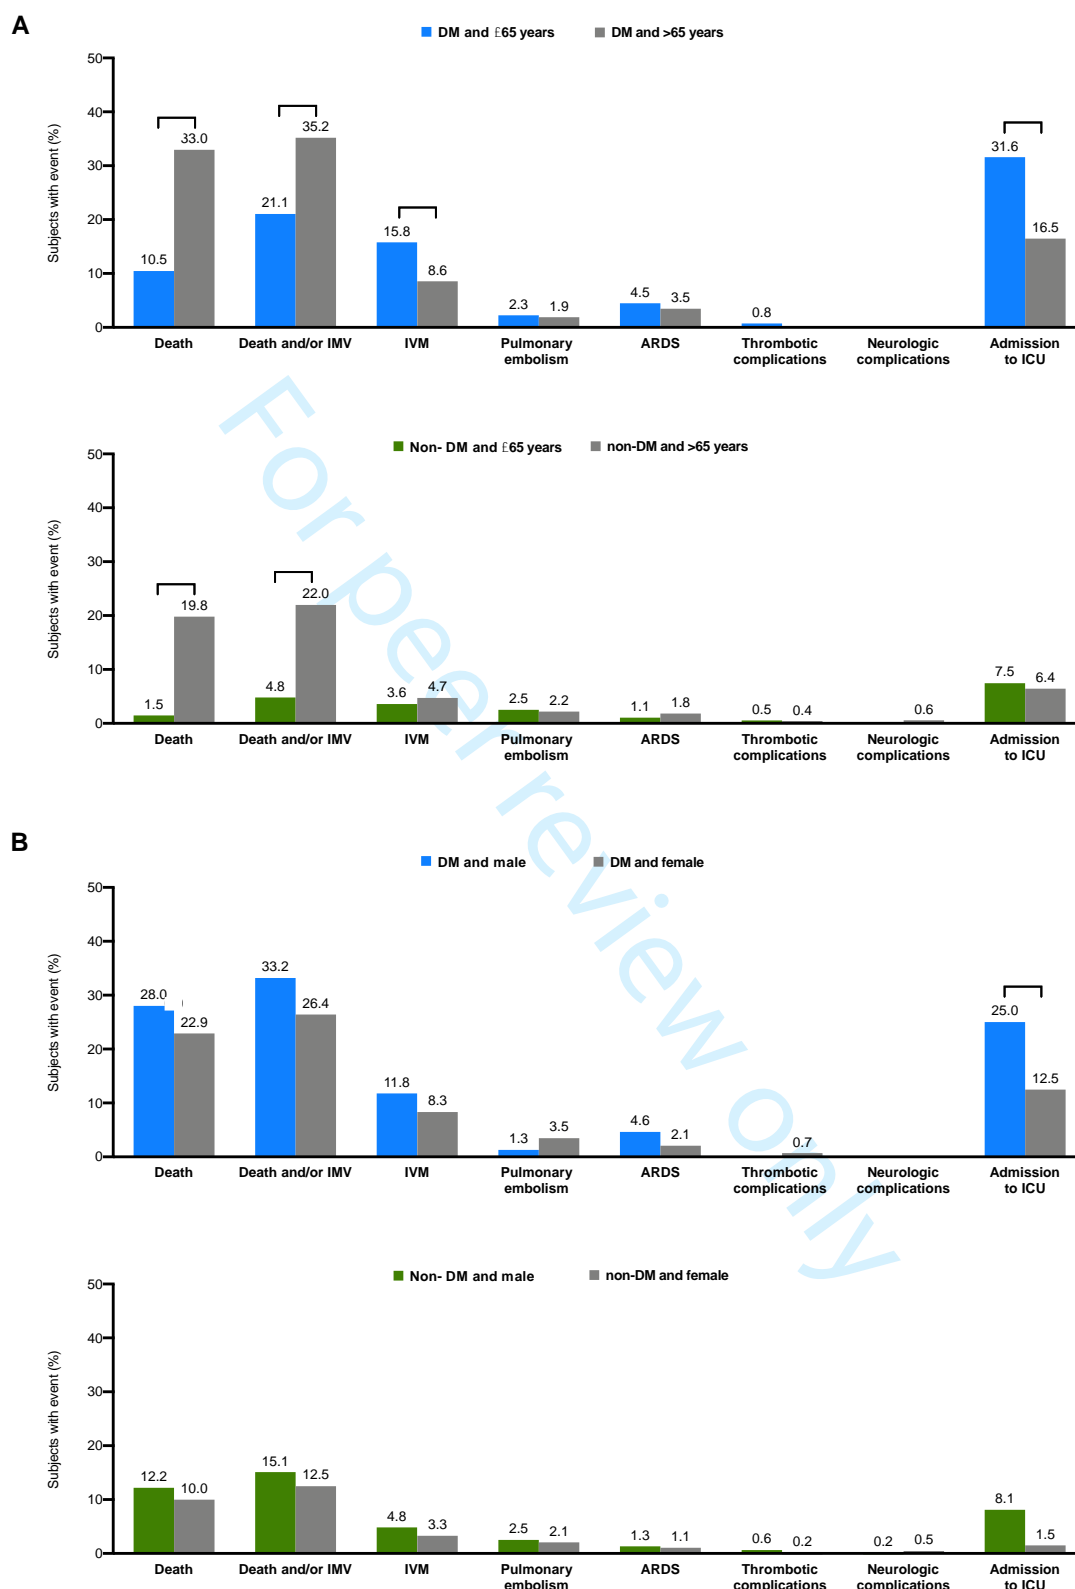

ARDS, acute respiratory distress syndrome; DM, diabetes mellitus; ICU, intensive care unit; IMV, invasive mechanical ventilation. \*\*\*  $p < 0.001$ ; \*\*  $p < 0.01$ ; \*  $p < 0.05$

**Supplementary Table 2.** Clinical characteristics at baseline as predictors of death vs death or invasive mechanical ventilation according to the model with all potential independent variables included

| Predictors                        | Death       |             |         | Death or invasive mechanical ventilation |             |         |
|-----------------------------------|-------------|-------------|---------|------------------------------------------|-------------|---------|
|                                   | Odds Ratios | 95% CI      | p-value | Odds Ratios                              | 95% CI      | p-value |
| Diabetes (yes)                    | 2.325 ***   | 1.719–3.144 | <0.001  | 2.107 ***                                | 1.608–2.761 | <0.001  |
| Sex (male)                        | 1.977 ***   | 1.463–2.670 | <0.001  | 1.663 ***                                | 1.276–2.167 | <0.001  |
| Age (years)                       | 1.102 ***   | 1.087–1.117 | <0.001  | 1.063 ***                                | 1.052–1.075 | <0.001  |
| Obesity (yes)                     | 1.297       | 0.694–2.424 | 0.414   | 1.978 **                                 | 1.198–3.267 | 0.008   |
| Hypertension (yes)                | 1.188       | 0.874–1.613 | 0.271   | 1.188                                    | 0.902–1.565 | 0.221   |
| Hyperlipidaemia (yes)             | 1.289       | 0.919–1.808 | 0.141   | 1.158                                    | 0.853–1.572 | 0.346   |
| Cardiovascular diseases (yes)     | 1.721       | 0.999–2.966 | 0.051   | 1.403                                    | 0.830–2.370 | 0.206   |
| Heart failure (yes)               | 0.964       | 0.504–1.842 | 0.911   | 1.082                                    | 0.578–2.023 | 0.806   |
| Chronic renal insufficiency (yes) | 2.135 **    | 1.246–3.659 | 0.006   | 2.096 **                                 | 1.255–3.498 | 0.005   |
| COPD (yes)                        | 1.721 *     | 1.066–2.779 | 0.026   | 2.310 ***                                | 1.498–.564  | <0.001  |
| Observations                      | 2069        |             |         | 2069                                     |             |         |
| R2 Tjur                           | 0.208       |             |         | 0.157                                    |             |         |

p<0.05 \*\* p<0.01 \*\*\* p<0.001

1  
2  
3  
4  
5  
6  
7  
8  
9  
10  
11  
12  
13  
14  
15  
16  
17  
18  
19  
20  
21  
22  
23  
24  
25  
26  
27  
28  
29  
30  
31  
32  
33  
34  
35  
36  
37  
38  
39  
40  
41  
42  
43  
44  
45  
46

**Supplementary Table 3.** Mortality model evaluating diabetes and interactions with other clinical comorbid conditions regarding the outcome of death.

| Predictors                        | Death       |             |         |
|-----------------------------------|-------------|-------------|---------|
|                                   | Odds Ratios | 95% CI      | p-value |
| Diabetes * Obesity                | 0.720       | 0.214–2.425 | 0.596   |
| Diabetes * Hyperlipidaemia        | 0.766       | 0.407–1.442 | 0.408   |
| Diabetes * Heart failure          | 1.406       | 0.373–5.298 | 0.614   |
| Diabetes * Chronic kidney disease | 0.805       | 0.273–2.371 | 0.693   |
| Diabetes * COPD                   | 0.631       | 0.235–1.696 | 0.361   |

For peer review only

**Supplementary Table 4.** Clinical characteristics at baseline associated with in-hospital death stratified for diabetes status (model 3, namely the model with all demographic and clinical variables included).

| Predictors              | Without diabetes |             |         | Diabetes    |             |         |
|-------------------------|------------------|-------------|---------|-------------|-------------|---------|
|                         | Odds Ratios      | 95% CI      | p-value | Odds Ratios | 95% CI      | p-value |
| Sex (male)              | 2.107 ***        | 1.516–2.929 | <0.001  | 2.125 *     | 1.014–4.451 | 0.046   |
| Age                     | 1.096 ***        | 1.081–1.112 | <0.001  | 1.124 ***   | 1.081–1.170 | <0.001  |
| Obesity                 | 1.984            | 0.938–4.198 | 0.073   | 0.826       | 0.272–2.511 | 0.736   |
| Hypertension            | 1.333            | 0.947–1.876 | 0.099   | 0.823       | 0.400–1.697 | 0.598   |
| Hyperlipidaemia         | 1.173            | 0.780–1.765 | 0.443   | 1.729       | 0.899–3.326 | 0.101   |
| Cardiovascular diseases | 1.943 *          | 1.033–3.654 | 0.039   | 1.368       | 0.445–4.208 | 0.584   |
| Heart failure           | 0.926            | 0.442–1.944 | 0.840   | 1.330       | 0.323–5.484 | 0.693   |
| Chronic kidney disease  | 2.143 *          | 1.137–4.038 | 0.018   | 2.839 *     | 1.000–8.060 | 0.050   |
| COPD                    | 1.712            | 0.984–2.979 | 0.057   | 1.404       | 0.529–3.729 | 0.495   |
| Observations            | 1795             |             |         | 274         |             |         |
| R2 Tjur                 | 0.178            |             |         | 0.240       |             |         |

p<0.05 \*\* p<0.01 \*\*\* p<0.001

**Supplementary Table 5.** Clinical characteristics at baseline associated to in-hospital death or mechanical ventilation stratified for diabetes status (model 3, namely the model with all demographic and clinical variables included).

| Predictors              | Without diabetes |             |         | Diabetes    |             |         |
|-------------------------|------------------|-------------|---------|-------------|-------------|---------|
|                         | Odds Ratios      | 95% CI      | p-value | Odds Ratios | 95% CI      | p-value |
| Sex (male)              | 1.710 ***        | 1.282–2.280 | <0.001  | 2.138 *     | 1.081–4.226 | 0.029   |
| Age                     | 1.061 ***        | 1.050–1.073 | <0.001  | 1.082 ***   | 1.047–1.118 | <0.001  |
| Obesity                 | 2.958 ***        | 1.651–5.298 | <0.001  | 1.090       | 0.420–2.827 | 0.860   |
| Hypertension            | 1.297            | 0.955–1.762 | 0.096   | 0.920       | 0.473–1.789 | 0.806   |
| Hyperlipidaemia         | 1.165            | 0.811–1.675 | 0.408   | 1.326       | 0.728–2.415 | 0.356   |
| Cardiovascular diseases | 1.525            | 0.827–2.814 | 0.177   | 1.217       | 0.426–3.477 | 0.714   |
| Heart failure           | 0.923            | 0.447–1.906 | 0.829   | 2.219       | 0.549–8.971 | 0.264   |
| Chronic kidney disease  | 1.993 *          | 1.084–3.662 | 0.026   | 3.140 *     | 1.163–8.474 | 0.024   |
| COPD                    | 2.298 **         | 1.396–3.781 | 0.001   | 1.976       | 0.800–4.885 | 0.140   |
| Observations            | 1795             |             |         | 274         |             |         |
| R2 Tjur                 | 0.129            |             |         | 0.190       |             |         |

p<0.05 \*\* p<0.01 \*\*\* p<0.001

**Supplementary Table 6.** Multivariate model of the association between predictors and the odds of death and death or invasive mechanical ventilation based on the nonlinear glucose curve.

| Predictors              | Death      |             |         | Death or Invasive mechanical ventilation |             |         |
|-------------------------|------------|-------------|---------|------------------------------------------|-------------|---------|
|                         | Odds Ratio | 95% CI      | p-value | Odds Ratio                               | 95% CI      | p-value |
| Sex (male)              | 1.911 ***  | 1.375–2.655 | <0.001  | 1.540 **                                 | 1.159–2.047 | 0.003   |
| Age                     | 1.108 ***  | 1.090–1.125 | <0.001  | 1.062 ***                                | 1.049–1.074 | <0.001  |
| Obesity                 | 1.079      | 0.527–2.206 | 0.836   | 1.814 *                                  | 1.057–3.112 | 0.031   |
| Hypertension            | 1.109      | 0.800–1.537 | 0.534   | 1.134                                    | 0.849–1.515 | 0.394   |
| Hyperlipidaemia         | 1.330      | 0.928–1.906 | 0.120   | 1.152                                    | 0.837–1.585 | 0.386   |
| Cardiovascular diseases | 1.686      | 0.958–2.967 | 0.070   | 1.356                                    | 0.792–2.325 | 0.267   |
| Heart failure           | 0.768      | 0.388–1.520 | 0.448   | 0.911                                    | 0.472–1.757 | 0.781   |
| Chronic kidney disease  | 2.251 **   | 1.268–3.996 | 0.006   | 2.151 **                                 | 1.250–3.701 | 0.006   |
| COPD                    | 1.666 *    | 1.006–2.760 | 0.047   | 2.253 ***                                | 1.436–3.536 | <0.001  |
| s(Glucose)              | 29.254 *** |             | <0.001  | 33.307 ***                               |             | <0.001  |
| Observations            |            |             | 1877    |                                          |             | 1877    |
| R2                      |            |             | 0.241   |                                          |             | 0.188   |

p<0.05 \*\* p<0.01 \*\*\* p<0.001



**STROBE 2007 (v4) Statement—Checklist of items that should be included in reports of *cross-sectional studies***

| Section/Topic                | Item # | Recommendation                                                                                                                                                                       | Reported on page # |
|------------------------------|--------|--------------------------------------------------------------------------------------------------------------------------------------------------------------------------------------|--------------------|
| <b>Title and abstract</b>    | 1      | (a) Indicate the study's design with a commonly used term in the title or the abstract                                                                                               | 1                  |
|                              |        | (b) Provide in the abstract an informative and balanced summary of what was done and what was found                                                                                  | 3                  |
| <b>Introduction</b>          |        |                                                                                                                                                                                      |                    |
| Background/rationale         | 2      | Explain the scientific background and rationale for the investigation being reported                                                                                                 | 5                  |
| Objectives                   | 3      | State specific objectives, including any prespecified hypotheses                                                                                                                     | 6                  |
| <b>Methods</b>               |        |                                                                                                                                                                                      |                    |
| Study design                 | 4      | Present key elements of study design early in the paper                                                                                                                              | 7                  |
| Setting                      | 5      | Describe the setting, locations, and relevant dates, including periods of recruitment, exposure, follow-up, and data collection                                                      | 7                  |
| Participants                 | 6      | (a) Give the eligibility criteria, and the sources and methods of selection of participants                                                                                          | 7                  |
| Variables                    | 7      | Clearly define all outcomes, exposures, predictors, potential confounders, and effect modifiers. Give diagnostic criteria, if applicable                                             | 7-8                |
| Data sources/<br>measurement | 8*     | For each variable of interest, give sources of data and details of methods of assessment (measurement). Describe comparability of assessment methods if there is more than one group | 7                  |
| Bias                         | 9      | Describe any efforts to address potential sources of bias                                                                                                                            | 8                  |
| Study size                   | 10     | Explain how the study size was arrived at                                                                                                                                            | 9                  |
| Quantitative variables       | 11     | Explain how quantitative variables were handled in the analyses. If applicable, describe which groupings were chosen and why                                                         | 8                  |
| Statistical methods          | 12     | (a) Describe all statistical methods, including those used to control for confounding                                                                                                | 8                  |
|                              |        | (b) Describe any methods used to examine subgroups and interactions                                                                                                                  | 8                  |
|                              |        | (c) Explain how missing data were addressed                                                                                                                                          | 8                  |
|                              |        | (d) If applicable, describe analytical methods taking account of sampling strategy                                                                                                   | NA                 |
|                              |        | (e) Describe any sensitivity analyses                                                                                                                                                | NA                 |
| <b>Results</b>               |        |                                                                                                                                                                                      |                    |

|                          |     |                                                                                                                                                                                                                                                                                                                                                                                                               |                                               |
|--------------------------|-----|---------------------------------------------------------------------------------------------------------------------------------------------------------------------------------------------------------------------------------------------------------------------------------------------------------------------------------------------------------------------------------------------------------------|-----------------------------------------------|
| Participants             | 13* | (a) Report numbers of individuals at each stage of study—eg numbers potentially eligible, examined for eligibility, confirmed eligible, included in the study, completing follow-up, and analysed<br>(b) Give reasons for non-participation at each stage<br>(c) Consider use of a flow diagram                                                                                                               | 9<br><br>Supplementary figure 1               |
| Descriptive data         | 14* | (a) Give characteristics of study participants (eg demographic, clinical, social) and information on exposures and potential confounders<br>(b) Indicate number of participants with missing data for each variable of interest                                                                                                                                                                               | Table 1<br>NA                                 |
| Outcome data             | 15* | Report numbers of outcome events or summary measures                                                                                                                                                                                                                                                                                                                                                          | Figure 1                                      |
| Main results             | 16  | (a) Give unadjusted estimates and, if applicable, confounder-adjusted estimates and their precision (eg, 95% confidence interval). Make clear which confounders were adjusted for and why they were included<br>(b) Report category boundaries when continuous variables were categorized<br>(c) If relevant, consider translating estimates of relative risk into absolute risk for a meaningful time period | Figure 2,<br>Supplementary table2<br>NA<br>NA |
| Other analyses           | 17  | Report other analyses done—eg analyses of subgroups and interactions, and sensitivity analyses                                                                                                                                                                                                                                                                                                                | 12,13<br>Supplementary table 3,4,5            |
| <b>Discussion</b>        |     |                                                                                                                                                                                                                                                                                                                                                                                                               |                                               |
| Key results              | 18  | Summarise key results with reference to study objectives                                                                                                                                                                                                                                                                                                                                                      | 18                                            |
| Limitations              | 19  | Discuss limitations of the study, taking into account sources of potential bias or imprecision. Discuss both direction and magnitude of any potential bias                                                                                                                                                                                                                                                    | 22                                            |
| Interpretation           | 20  | Give a cautious overall interpretation of results considering objectives, limitations, multiplicity of analyses, results from similar studies, and other relevant evidence                                                                                                                                                                                                                                    | 18-22                                         |
| Generalisability         | 21  | Discuss the generalisability (external validity) of the study results                                                                                                                                                                                                                                                                                                                                         | 19-20                                         |
| <b>Other information</b> |     |                                                                                                                                                                                                                                                                                                                                                                                                               |                                               |
| Funding                  | 22  | Give the source of funding and the role of the funders for the present study and, if applicable, for the original study on which the present article is based                                                                                                                                                                                                                                                 | 23                                            |

\*Give information separately for cases and controls in case-control studies and, if applicable, for exposed and unexposed groups in cohort and cross-sectional studies.

1  
2  
3  
4  
5  
6  
7  
8  
9  
10  
11  
12  
13  
14  
15  
16  
17  
18  
19  
20  
21  
22  
23  
24  
25  
26  
27  
28  
29  
30  
31  
32  
33  
34  
35  
36  
37  
38  
39  
40  
41  
42  
43  
44  
45  
46

**Note:** An Explanation and Elaboration article discusses each checklist item and gives methodological background and published examples of transparent reporting. The STROBE checklist is best used in conjunction with this article (freely available on the Web sites of PLoS Medicine at <http://www.plosmedicine.org/>, Annals of Internal Medicine at <http://www.annals.org/>, and Epidemiology at <http://www.epidem.com/>). Information on the STROBE Initiative is available at [www.strobe-statement.org](http://www.strobe-statement.org).

For peer review only

# BMJ Open

## Risk factors for severe outcomes in people with diabetes hospitalized for COVID-19: A cross-sectional "Covid Data Save Lives" database study

|                                 |                                                                                                                                                                                                                                                                                                                                                                                                                                                                                                                                                                                                                                                                                                                                                                                                                                                                                                                                                                                                                                                                                                                                                                                                                                                                                                                                                     |
|---------------------------------|-----------------------------------------------------------------------------------------------------------------------------------------------------------------------------------------------------------------------------------------------------------------------------------------------------------------------------------------------------------------------------------------------------------------------------------------------------------------------------------------------------------------------------------------------------------------------------------------------------------------------------------------------------------------------------------------------------------------------------------------------------------------------------------------------------------------------------------------------------------------------------------------------------------------------------------------------------------------------------------------------------------------------------------------------------------------------------------------------------------------------------------------------------------------------------------------------------------------------------------------------------------------------------------------------------------------------------------------------------|
| Journal:                        | <i>BMJ Open</i>                                                                                                                                                                                                                                                                                                                                                                                                                                                                                                                                                                                                                                                                                                                                                                                                                                                                                                                                                                                                                                                                                                                                                                                                                                                                                                                                     |
| Manuscript ID                   | bmjopen-2021-051237.R1                                                                                                                                                                                                                                                                                                                                                                                                                                                                                                                                                                                                                                                                                                                                                                                                                                                                                                                                                                                                                                                                                                                                                                                                                                                                                                                              |
| Article Type:                   | Original research                                                                                                                                                                                                                                                                                                                                                                                                                                                                                                                                                                                                                                                                                                                                                                                                                                                                                                                                                                                                                                                                                                                                                                                                                                                                                                                                   |
| Date Submitted by the Author:   | 01-Jun-2021                                                                                                                                                                                                                                                                                                                                                                                                                                                                                                                                                                                                                                                                                                                                                                                                                                                                                                                                                                                                                                                                                                                                                                                                                                                                                                                                         |
| Complete List of Authors:       | <p>Ortega, Emilio; Hospital Clinic de Barcelona<br/> Corcoy, Rosa; Hospital de la Santa Creu i Sant Pau,<br/> Gratacòs , Mònica; IDIAP Jordi Gol<br/> Cos Claramunt, Francesc Xavier; IDIAP Jordi Gol<br/> Mata-Cases, Manel; IDIAP Jordi Gol, DAP-Cat Group, Unitat de Suport a la Recerca Barcelona; Institut Català De La Salut, La Mina Primary Health Care Centre<br/> Puig- Treserra, Ramon ; IDIAP Jordi Gol<br/> Real, Jordi; Institut Universitari d'Investigaci Primària Jordi Gol (IDIAP Jordi Gol), DAP-Cat group. Unitat de Suport a la Recerca Barcelona Ciutat<br/> Vlacho, Bogdan; IDIAP Jordi Gol<br/> Castelblanco, Esmeralda; Hospital de la Santa Creu i Sant Pau, Endocrinology<br/> Domingo, Pere; Hospital de la Santa Creu i Sant Pau, Infectious Diseases<br/> Khunti, Kamlesh; University of Leicester, Diabetes Research Centre<br/> Franch-Nadal, Josep; DAP-Cat group. Unitat de Suport a la Recerca Barcelona Ciutat, Institut Universitari d'Investigació en Atenció Primària Jordi Gol (IDIAP Jordi Gol); Primary Health Care Center Raval Sud, Gerència d'Àmbit d'Atenció Primària Barcelona Ciutat, Institut Català de la Salut<br/> Mauricio, Didac ; Hospital de la Santa Creu i Sant Pau, Endocrinology &amp; Nutrition; Fundacio Institut de Recerca Hospital de la Santa Creu i Sant Pau, Didac Mauricio</p> |
| <b>Primary Subject Heading</b>: | Diabetes and endocrinology                                                                                                                                                                                                                                                                                                                                                                                                                                                                                                                                                                                                                                                                                                                                                                                                                                                                                                                                                                                                                                                                                                                                                                                                                                                                                                                          |
| Secondary Subject Heading:      | Epidemiology, Infectious diseases                                                                                                                                                                                                                                                                                                                                                                                                                                                                                                                                                                                                                                                                                                                                                                                                                                                                                                                                                                                                                                                                                                                                                                                                                                                                                                                   |
| Keywords:                       | COVID-19, General diabetes < DIABETES & ENDOCRINOLOGY, Epidemiology < INFECTIOUS DISEASES                                                                                                                                                                                                                                                                                                                                                                                                                                                                                                                                                                                                                                                                                                                                                                                                                                                                                                                                                                                                                                                                                                                                                                                                                                                           |
|                                 |                                                                                                                                                                                                                                                                                                                                                                                                                                                                                                                                                                                                                                                                                                                                                                                                                                                                                                                                                                                                                                                                                                                                                                                                                                                                                                                                                     |

SCHOLARONE™  
Manuscripts

1  
2  
3  
4  
5  
6  
7  
8  
9  
10  
11  
12  
13  
14  
15  
16  
17  
18  
19  
20  
21  
22  
23  
24  
25  
26  
27  
28  
29  
30  
31  
32  
33  
34  
35  
36  
37  
38  
39  
40  
41  
42  
43  
44  
45  
46  
47  
48  
49  
50  
51  
52  
53  
54  
55  
56  
57  
58  
59  
60



I, the Submitting Author has the right to grant and does grant on behalf of all authors of the Work (as defined in the below author licence), an exclusive licence and/or a non-exclusive licence for contributions from authors who are: i) UK Crown employees; ii) where BMJ has agreed a CC-BY licence shall apply, and/or iii) in accordance with the terms applicable for US Federal Government officers or employees acting as part of their official duties; on a worldwide, perpetual, irrevocable, royalty-free basis to BMJ Publishing Group Ltd ("BMJ") its licensees and where the relevant Journal is co-owned by BMJ to the co-owners of the Journal, to publish the Work in this journal and any other BMJ products and to exploit all rights, as set out in our [licence](#).

The Submitting Author accepts and understands that any supply made under these terms is made by BMJ to the Submitting Author unless you are acting as an employee on behalf of your employer or a postgraduate student of an affiliated institution which is paying any applicable article publishing charge ("APC") for Open Access articles. Where the Submitting Author wishes to make the Work available on an Open Access basis (and intends to pay the relevant APC), the terms of reuse of such Open Access shall be governed by a Creative Commons licence – details of these licences and which [Creative Commons](#) licence will apply to this Work are set out in our licence referred to above.

Other than as permitted in any relevant BMJ Author's Self Archiving Policies, I confirm this Work has not been accepted for publication elsewhere, is not being considered for publication elsewhere and does not duplicate material already published. I confirm all authors consent to publication of this Work and authorise the granting of this licence.

# Risk factors for severe outcomes in people with diabetes hospitalized for COVID-19: A cross-sectional “Covid Data Save Lives” database study

Emilio Ortega <sup>1,2,3</sup>, Rosa Corcoy <sup>4,5,6</sup>, Mònica Gratacòs<sup>1</sup>, Xavier Cos-Claramunt <sup>1,7</sup>, Manel Mata-Cases <sup>1,8,10</sup>, Ramon Puig- Treserra<sup>1</sup>, Jordi Real <sup>1</sup>, Bogdan Vlacho <sup>1</sup>, Esmeralda Castelblanco <sup>1,8</sup>, Pere Domingo <sup>9</sup>, Kamlesh Khunti <sup>11</sup>, Josep Franch-Nadal <sup>1,8,12\*</sup> and Dídac Mauricio <sup>1,4,8,13\*</sup>

<sup>1</sup> DAP-Cat group, Unitat de Suport a la Recerca Barcelona, Fundació Institut Universitari per a la recerca a l'Atenció Primària de Salut Jordi Gol i Gurina (IDIAPJGol), Barcelona, Spain

<sup>2</sup> CIBER of physiopathology of Obesity and Nutrition (CIBEROBN), Instituto de Salud Carlos III (ISCIII), Spain

<sup>3</sup> Department of Endocrinology and Nutrition, Institut d'Investigacions Biomèdiques August Pi i Suñer, Hospital Clinic, Barcelona, Spain

<sup>4</sup> Department of Endocrinology and Nutrition, Hospital Universitari de la Santa Creu i Sant Pau;

<sup>5</sup> Department of Medicine, Universitat Autònoma de Barcelona, Barcelona, Spain

<sup>6</sup> CIBER of Bioengineering, Biomaterials and Nanomedicine (CIBER-BBN), Instituto de Salud Carlos III (ISCIII), Spain

<sup>7</sup> Innovation office at Institut Català de la Salut, Barcelona, Spain

<sup>8</sup> CIBER of Diabetes and Associated Metabolic Diseases (CIBERDEM), Instituto de Salud Carlos III (ISCIII), Spain

<sup>9</sup> Infectious Diseases, Hospital Universitari de la Santa Creu i Sant Pau, Institut de Recerca Hospital Universitari de la Santa Creu i Sant Pau, Spain

<sup>10</sup> Primary Health Care Center La Mina, Gerència d'Àmbit d'Atenció Primària Barcelona Ciutat, Institut Català de la Salut, Sant Adrià de Besòs, Spain

<sup>11</sup> Diabetes Research Centre, University of Leicester, Leicester, UK

<sup>12</sup> Primary Health Care Center Raval Sud, Gerència d'Atenció Primària, Institut Català de la Salut, Barcelona, Spain

<sup>13</sup> Departament de Medicina, University of Vic - Central University of Catalonia, Vic, Barcelona, Spain.

\*Corresponding authors

Dr Dídac Mauricio,

Hospital de la Santa Creu i Sant Pau,

Sant Quintí, 89

08041 Barcelona, Spain

Telephone No.: +34 935565661; Fax No.: +34 9355602

Email: [didacmauricio@gmail.com](mailto:didacmauricio@gmail.com)

Dr Josep Franch-Nadal,

Centre d'Atenció Primària Raval Sud,

Av. Drassanes, 17-21,

08001 Barcelona, Spain

Telephone No.: +34 933294495; Fax No.: +34 9344277 63

Email: [josep.franch@gmail.com](mailto:josep.franch@gmail.com)

Word count: abstract 291; main text 3623

Tables: 1

Figures: 6

References: 46

Appendix: Tables 7; Figures 1;

1  
2  
3 **Abstract:**  
4

5  
6 **Aim:** This study's objective was to assess the risk of severe in-hospital complications of patients  
7  
8  
9 admitted for coronavirus disease (COVID-19) and diabetes mellitus (DM).  
10

11  
12 **Design:** This was a cross-sectional study  
13  
14

15 **Settings:** We used pseudonymised medical record data provided by six general hospitals from the  
16  
17 HM Hospitales group in Spain.  
18

19  
20 **Outcome measures:** Multiple logistic regression analyses were used to identify variables  
21  
22 associated with mortality and the composite of mortality or invasive mechanical ventilation (IMV)  
23  
24 in the overall population, and stratified for the presence or absence of DM. Spline analysis was  
25  
26 conducted on the entire population to investigate the relationship between glucose levels at  
27  
28 admission and outcomes.  
29  
30

31  
32 **Results:** Overall, 1,621 individuals without DM and 448 with DM were identified in the database.  
33  
34 DM patients were on average 5.1 years older than those without. The overall in-hospital mortality  
35  
36 was 18.6% (N=301), and was higher among patients with DM than without (26.3% *vs.* 11.3%;  
37  
38  $p < 0.001$ ). DM was independently associated with death, and death or IMV (OR=2.33, 95% CI: 1.7–  
39  
40 3.1 and OR=2.11, 95% CI: 1.6– 2.8, respectively;  $p < 0.001$ ). In DM subjects, the only variables  
41  
42 independently associated with both outcomes were age >65 years, male sex, and pre-existing  
43  
44 chronic kidney disease (CKD). We observed a non-linear relationship between blood glucose  
45  
46 levels at admission and risk of in-hospital mortality and death or IMV. The highest probability for  
47  
48 each outcome (around 50%) was at random glucose of around 550 mg/dL (30.6 mmol/L), the risks  
49  
50 flattened above this value.  
51  
52  
53  
54

55  
56 **Conclusion:** The results confirm the high burden associated with DM in patients hospitalized with  
57  
58 COVID-19 infection, particularly among males, the elderly, and those with impaired kidney  
59  
60



1  
2  
3 1 function. Moreover, hyperglycaemia on admission was strongly associated with poor outcomes,  
4  
5 2 suggesting that personalised optimisation could help to improve outcome during the hospital  
6  
7  
8 3 stay.  
9

10  
11 4 **Keywords:** COVID-19, Diabetes, Hyperglycaemia, In-hospital mortality, Mechanical ventilation  
12  
13  
14 5

15 6 **Strengths and limitations of this study**  
16  
17

- 18  
19 7 • A major strength of our study is the thorough methodological approach to analyse the risk  
20  
21 8 of in-hospital COVID-19-related complications based on the presence of DM or overt  
22  
23 9 hyperglycaemia.  
24  
25  
26 10 • We were limited by not having access to the patients' medical history prior to admission,  
27  
28 11 and the low number of registers for some important DM variables (such as Hb1Ac), and the  
29  
30 12 lack of data on weight or BMI (only the presence of obesity).  
31  
32  
33  
34 13 • The selection of DM subjects was made based on a proxy algorithm (including DM  
35  
36 14 diagnosis during the hospital stay, antidiabetic treatment, and HbA1c and blood glucose  
37  
38 15 levels at admission.  
39  
40  
41  
42 16 • We used random blood glucose on admission for spline analyses, thus preventing the  
43  
44 17 distinction between stress-related hyperglycaemia and uncontrolled pre-existing DM.  
45  
46  
47 18  
48  
49  
50  
51  
52  
53  
54  
55  
56  
57  
58  
59  
60

## 1. Introduction

On January 30, 2020, the World Health Organization (WHO) declared the outbreak of the novel SARS-CoV-2 coronavirus pandemic, a public health emergency of international importance. A few days later, the respiratory disease caused by SARS-CoV-2 was officially named COVID-19 (Corona Virus Infectious Disease 2019) [1, 2]. The first person diagnosed as positive in Spain was confirmed on January 31, 2020, on the island of La Gomera [3]. The median age of hospitalized patients infected with SARS-CoV-2 is 46.2 years, men comprise about 60% of patients, and the average incubation period is 5.7 days [4]. As of February 8, 2021, approximately 3 million people have been infected with SARS-CoV-2 in Spain since the start of the COVID-19 pandemic, and 62,295 persons have died.

Several meta-analyses have reported that the most severe and fatal cases of COVID-19 occur among the elderly and in patients with underlying comorbidities [5-7]. Indeed, those with two or more concomitant diseases have a significantly higher risk of admission to an intensive care unit (ICU), invasive ventilation, or death compared with those with a single concomitant disease, or without comorbidities [8]. The most prevalent comorbidities associated with increased COVID-19-related morbidity and mortality are the presence of diabetes mellitus (DM), cardiovascular diseases (CVDs), chronic lung disease, chronic kidney disease (CKD), hypertension, cancer, and obesity [5-7]. In addition, the AB0 blood type may play a role in the susceptibility and severity of COVID-19 infection, which could be of importance in patients with underlying high-risk conditions [8]. For instance, it has been reported that non-0 blood group hypertensive patients have significantly higher values of pro-thrombotic indexes and increased rates of cardiac injury and deaths compared with 0 patients [9].

SARS-CoV-2 utilizes angiotensin-converting enzyme 2 (ACE-2) as a cellular entry receptor, and the spike protein of the virus needs to be cleaved by cellular proteases (specifically TMPRSS2) to fuse

1 with the cellular membrane [10]. Although it was initially assumed that ACE inhibitors and  
2 angiotensin receptor blockers to treat hypertension or cardiovascular conditions might exacerbate  
3 COVID-19 infection and lead to worse outcomes, the most recent available meta-analysis did not  
4 confirm this higher risk [11]. Finally, it has been suggested that modulating TMPRSS2 expression  
5 through specific antibodies or non-coding-RNAs could prevent virus entry into host cells [11, 12],  
6 but these potential therapeutic options are still under investigation.

7 Previous studies have reported that people with DM are prone to new infections and recurrence,  
8 particularly influenza and pneumonia, due to impaired defences and disease complications [13-16].  
9 Although the estimated prevalence of DM in COVID-19 infected patients varies greatly by  
10 geographical region, it is considered similar to the DM prevalence in the general population, thus  
11 not representing a risk factor for infection [17]. However, the prevalence of diabetes among COVID-  
12 19 hospitalized subjects is higher than the overall diabetes prevalence [17, 18]. A study conducted in  
13 England found that a third of in-hospital deaths occurred in people with type 2 DM and that these  
14 patients had greater odds of COVID-19-related in-hospital death than those without DM [19]. This  
15 observation has been confirmed in a meta-analysis showing that DM is associated with a 2-fold  
16 higher risk of dying from COVID-19 [20], and a second study reporting that patients with pre-  
17 existing DM have a 3-fold greater risk of in-hospital mortality [21].

18 Early reports showed that about half of patients with severe COVID-19 presented acute  
19 hyperglycaemia, with no more than 10% of them having a prior diagnosis of DM [22, 23]. Following  
20 these observations, two meta-analyses concluded that hyperglycaemia at hospital admission is  
21 associated with severe complications and mortality, regardless of diabetes status [24,25]. Moreover,  
22 hyperglycaemia also has a negative impact on the therapeutic response to tocilizumab in patients  
23 with COVID-19-related systemic inflammation [26].

1  
2  
3 1 In Spain, DM is a highly prevalent disease in people over 18 years of age (13.8% of the population)  
4  
5 2 [27]. Given the high prevalence of DM and the additional challenging scenario that COVID-19  
6  
7 3 poses to health care professionals in this particular population, it is crucial to accumulate and share  
8  
9 4 information and data from different countries and regions [28]. Following this notion, the main  
10  
11 5 objective of this study was to assess the risk of in-hospital COVID-19-related complications based  
12  
13 6 on the presence of DM or overt hyperglycaemia at admission in Spain.  
14  
15  
16  
17 7  
18  
19  
20  
21  
22  
23  
24  
25  
26  
27  
28  
29  
30  
31  
32  
33  
34  
35  
36  
37  
38  
39  
40  
41  
42  
43  
44  
45  
46  
47  
48  
49  
50  
51  
52  
53  
54  
55  
56  
57  
58  
59  
60

For peer review only

## 1 2. Methods

### 2 2.1 Study design and settings

3 This was a cross-sectional study in hospitalized individuals infected with SARS-CoV-2, stratified by  
4 presence or absence of DM. Data were obtained from pseudonymized electronic health records  
5 provided by six general hospitals from the HM Hospitales group (Spain). The database included  
6 information related during the hospital stay (diagnosis and procedures codes, prescribed  
7 medications, vital signs, and laboratory parameters), from 2,310 subjects during the first COVID-19  
8 wave with hospital admission between January 27 and April 24, 2020 (study start and end date,  
9 respectively). Subjects were followed from admission to hospital discharge or death. Detailed  
10 information related to the database is presented in the Supplementary material (**Database  
11 description**).

12 The study data were collected by medical professionals of the HM Hospitales group (Spain) during  
13 the first wave of the COVID-19 pandemic. In order to promote COVID-19 related research, the HM  
14 Hospitales group pseudonymized the medical history of SARS-CoV-2 infected patients and created  
15 a project titled: "Covid Data Save Lives". Before access was granted, a formal petition, specific  
16 study protocol, and ethics committee approval were obtained. The study was approved by the  
17 Ethics Committee of the Primary Health Care University Research Institute (IDIAP) Jordi Gol,  
18 Barcelona (approval number: 20/089-PCV).

### 19 2.2 Inclusion and Exclusion Criteria

20 The study enrolled people over 18 years of age with SARS-CoV-2 infection (COVID positive)  
21 microbiologically proven by reverse transcription polymerase chain reaction (RT-PCR). Those with  
22 DM were identified in the database if they: 1) had any ICD-10 (International Statistical  
23 Classification of Diseases) diagnostic code for type 1 or type 2 DM (i.e., E.10 and E11), 2) were on  
24 treatment with antidiabetic drugs, 3) had a register of insulin use within the first 24 hours after

1 admission, or 4) had a glycosylated haemoglobin (HbA1c) value  $\geq 6.5\%$  (48 mmol/mol; first available  
2 record after admission) or baseline blood glucose (BG) values  $\geq 200$  mg/dL (11.1 mmol/L; recorded  
3 within the first 24 hours of admission). Subjects with no confirmation of SARS-CoV-2 infection and  
4 those younger than 18 years were excluded from the study.

### 5 *2.3 Study Variables*

6 The following baseline variables were collected: age and sex; SARS-CoV-2 diagnosis (positive RT-  
7 PCR); comorbidities (i.e., hypertension, hyperlipidaemia, obesity [BMI  $\geq 30$  kg/m<sup>2</sup>], CVD, heart  
8 failure, cerebrovascular diseases, ischemic heart disease, CKD, chronic obstructive pulmonary  
9 disease [COPD], asthma, mental disorders, and cancer); blood laboratory parameters (i.e., HbA1c,  
10 BG, electrolytes, renal function, liver function, haematology and coagulation, inflammation  
11 markers, and gas tests); clinical parameters (i.e., systolic and diastolic blood pressure, heart rate,  
12 and temperature), and concomitant medications (i.e., baseline insulins, systemic corticosteroids,  
13 antimicrobials, anticoagulants and antiplatelet agents, and antihypertensive and lipid-lowering  
14 drugs).

15 We considered the following variables as events or complications during the hospital stay: death,  
16 acute respiratory distress syndrome (ARDS), pulmonary thrombosis, neurologic complications,  
17 thrombotic complications identified by ICD-10 diagnostic codes, admission to ICU, and invasive  
18 mechanical ventilation (IMV) identified by ICD-10 procedure codes. The composite primary  
19 outcome was defined as death or IMV.

### 20 *2.4 Statistical Methods*

21 The demographic and clinical characteristics of the two groups of hospitalized patients (i.e., with or  
22 without DM) were compared and summarized at the quantitative (minimum, maximum, median,  
23 first and third quartile, mean, and standard deviation [ $\pm$ SD]) or categorical level (frequency,  
24 number and %).

1 The association between the study outcomes (i.e., mortality and mortality or mechanical  
2 ventilation) and DM was performed using logistic regression analyses adjusted for sex, age, and  
3 associated risk factors. In addition, several models of interest were tested (a model with basic  
4 clinical variables such as age and sex, a model adding obesity, hypertension and hyperlipidaemia,  
5 and a model adding organ lesion variables, such as CVD, heart failure, CKD, COPD), namely with  
6 the sequential inclusion of different covariates and the estimated differences expressed as odds  
7 ratio (OR) and the respective 95% confidence intervals (CI). We evaluated goodness of fit of the  
8 logistic regression models with H&L test (Hosmer–Lemeshow test). To analyse the nonlinear  
9 relationship of random blood glucose levels on admission with the two study outcomes, we used an  
10 adjusted semi-parametric model (generalized additive model [GAM]) calculating the spline curves  
11 with two degrees of freedom (knots) using the mgcv package in R, version 1.8-31[29] with  
12 adjustment for potential confounders. We analysed the entire database available and no statistical  
13 power was calculated. Data management and statistical analyses were performed using the R  
14 statistical software version 3.6.1 (<https://www.r-project.org/>).

### 15 *2.5 Patient and Public Involvement*

16 Patients or the public were not involved in the design, or conduct, or reporting, or dissemination  
17 plans of our research.

## 18 **3. Results**

### 19 *3.1. Baseline Characteristics*

20 Of the 2,306 subjects admitted to hospital within the period of study, 2,069 were over 18 years of  
21 age and had a positive diagnostic test for SARS-CoV-2 (**Figure 1**). Among them, 448 (21.7%) were  
22 identified as having DM and 1,621(78.3%) without DM (non-DM group). The characteristics of the  
23 two populations at hospital admission are shown in **Table 1**. Subjects with DM were on average 5.1  
24 years older than non-DM subjects, and more frequently male (67.9% *vs.* 58.6%). Moreover,

1 individuals in the DM group had a poor comorbidity profile, with a higher frequency of all  
2 assessed prior conditions except for cerebrovascular diseases and asthma.  
3 Regarding laboratory parameters on admission (**Supplementary Table 1**), the DM group had  
4 slightly lower estimated glomerular filtration rates (eGFR) ( $73.5 \pm 26.5$  mL/min/1.73 m<sup>2</sup> vs.  $81.2 \pm 23.9$   
5 mL/min/1.73 m<sup>2</sup>;  $p < 0.001$ ), and higher levels of serum creatinine ( $1.09 \pm 0.72$  mg/dL vs.  $0.94 \pm 0.51$   
6 mg/dL;  $p < 0.001$ ) than the non-DM group. Regarding markers of inflammation and infection, we  
7 observed higher levels of C-reactive protein and procalcitonin in the DM group ( $97.1 \pm 107$  mg/L vs.  
8  $75.9 \pm 82.5$  mg/L and  $0.66 \pm 1.30$  mg/L vs.  $0.39 \pm 1.30$  mg/L, respectively;  $p < 0.001$ ). We also observed  
9 higher levels of D-dimer, a marker of endothelial and coagulation dysfunction in the DM group  
10 ( $3990 \pm 10800$  ng/mL vs.  $2340 \pm 6720$  ng/mL, respectively). Regarding the pharmacological therapy  
11 used during the hospital stay, we observed differences and increased use of almost all drugs of  
12 interest among DM subjects, compared with non-DM, especially for diuretics, systemic  
13 corticosteroids, and tocilizumab.

### 14 3.2 Events and complications during in-hospital stay

15 A total of 301 (14.5%) subjects positive for SARS-CoV-2 died in-hospital, 118 (26.3%) out of 448 in  
16 the DM group and 183 (11.3%) out of 1621 in the non-DM group ( $p < 0.001$ ; **Figure 2**). All studied  
17 events, except pulmonary embolism and thrombotic or neurologic complications, were significantly  
18 more frequent among patients with DM than without (**Figure 2**). The most frequent outcome was  
19 the composite of death or IMV (31% in the DM group vs. 14% in the non-DM group; **Figure 2**)  
20 followed by death (26.3% vs. 11.3%), admission to ICU (21% vs. 6.9%), IMV (10.7% vs. 4.2%), and  
21 ARDS (3.8% vs. 1.5%).

22 The frequency of events by group and age showed that, in both subjects with and without DM,  
23 death and the composite of death or IMV were significantly more frequent among those >65 years  
24 (**Supplementary Figure 1**). In contrast, the proportion of subjects requiring IMV and ICU admission



1 was significantly higher among those  $\leq 65$  years and with DM, while age was not significant in those  
2 without DM. When stratifying the results by sex, we did not observe differences except for  
3 admission to ICU, which was significantly more frequent among male subjects with DM  
4 (**Supplementary Figure 1**). Within the diabetes group, when we stratified by pre-existing DM (DM  
5 codes and/or HBA1c  $\geq 6.5\%$  and/or antidiabetic treatment) and “stress” hyperglycaemia/ unknown  
6 diabetes (glucose  $\geq 200$  mg/dl or insulin use within the first 24h period after admission), we  
7 observed higher percentages for death, death or IMV, ARDS, admission to ICU and IMV events in  
8 subjects with “stress” hyperglycaemia. The results of this stratification are presented in  
9 **Supplementary Table 2**.

### 10 *3.3. Baseline demographic and clinical characteristics associated with in-hospital death and death or IMV*

11 For the overall hospitalized population, the demographic characteristics significantly associated  
12 with mortality were male sex and older age (OR=1.98, 95% CI=1.2–3.3 and OR=1.10, 95% CI=1.08–  
13 1.11, respectively) (**Figure 2; Supplementary Table 2**). The comorbidities independently associated  
14 with increased odds of death were DM (OR=2.33, 95% CI=1.7–3.1), CKD (OR=2.14, 95% CI=1.2–3.7),  
15 and COPD (OR=1.72, 95% CI=1.1–2.8).

16 When considering the composite outcome of death or IMV, the same variables associated with  
17 death (i.e., age, sex, diabetes, CKD, and COPD) were identified as increasing the risk. In addition,  
18 obesity emerged as an independently associated variable (OR=1.98, 95% CI=1.5–2.7) (**Figure 3**,  
19 **Supplementary Table 3**).

20 The multiple logistic regression models were repeated to rule out the potential interaction of DM  
21 with different clinical conditions (i.e., obesity, hyperlipidaemia, obesity and hyperlipidaemia, heart  
22 failure, CKD, and COPD) for the in-hospital death outcome. The results showed that none of these  
23 conditions affected the relationship between the risk of death and DM (**Supplementary Table 4**).

### 24 *3.4. Factors associated with hospital death and death or IMV by comorbid diabetes*

1 A sub-analysis was performed separately for subjects with or without DM. In the DM group, the  
2 only variables independently associated with the risk of both mortality and death or IMV were  
3 male sex, older age, and CKD (**Figure 4A and Supplementary Table 5 and 6**). In contrast, in  
4 subjects without DM, besides the aforementioned variables, the odds of death were also increased  
5 among subjects with CVD (OR=1.94, 95% CI=1.03– 3.7), and the odds of death or IMV among those  
6 with obesity or COPD (OR=2.96, 95% CI=1.7–5.3 and OR=2.30, 95% CI= 1.4 – 3.8, respectively)  
7 (**Figure 4B and Supplementary Table 5 and 6**).

### 8 *3.5. Factors associated with hospital death and death or IMV by glucose levels at admission*

9 We used non-parametric logistic regression models to assess whether there was a relationship  
10 between random BG on admission and the risk of mortality (and death or IMV). We observed a  
11 marked non-linearity in the effect of BG on admission in the risk of both outcomes (**Figure 5A and**  
12 **5B and Supplementary Table 7**). While the risk was increased among subjects with high random  
13 BG levels on admission, the magnitudes of the associated mortality differed depending on the  
14 baseline values, with a large increase in the log-odds of death or IMV with values up to 200 mg/dL  
15 (11.1 mmol/L), and smaller increases above this level. The logistic regression models (**Figure 6A and**  
16 **6B**) showed that the highest probability of death (near 50%) was at around 550 mg/dL (30.6  
17 mmol/L) and, above this value, the mortality risk flattened. Finally, the multivariate model showed  
18 that, beside glucose at admission, male sex, older age, CKD, and COPD were associated with in-  
19 hospital death (**Supplementary Table 7**). These variables were linked to death or IMV too, but  
20 obesity was an additional risk factor (**Supplementary Table 7**).

## 21 **4. Discussion**

22 Data from this cross-sectional study showed that the COVID-19 related in-hospital death rate was  
23 higher among subjects with DM than without. Moreover, DM was independently associated with  
24 the risk of in-hospital case fatality and the composite outcome, death or IMV. In the DM group,

1 both outcomes were associated with older age, male sex, and pre-existing CKD. Finally, we  
2  
3  
4  
5  
6  
7  
8  
9  
10  
11  
12  
13  
14  
15  
16  
17  
18  
19  
20  
21  
22  
23  
24  
25  
26  
27  
28  
29  
30  
31  
32  
33  
34  
35  
36  
37  
38  
39  
40  
41  
42  
43  
44  
45  
46  
47  
48  
49  
50  
51  
52  
53  
54  
55  
56  
57  
58  
59  
60

1 both outcomes were associated with older age, male sex, and pre-existing CKD. Finally, we  
2 observed a non-linear relationship between BG levels on admission and the probability of death  
3 and death or IMV in the overall inpatient population.

4 In our study, the proportion of severe COVID-19 cases (e.g., requiring IMV or ICU admission) in  
5 the DM population was higher than in the non-DM cohort. Moreover, DM patients were more  
6 frequently male and over 65 years, had more comorbid conditions, and higher levels of  
7 inflammatory, endothelial, and coagulation dysfunction markers on admission. Different meta-  
8 analyses have reported that older age and male sex are characteristics associated with severe  
9 COVID-19 infection and high fatality rates [17, 30, 31]. Along the same line, studies assessing the  
10 phenotypic characteristics of COVID-19 patients with pre-existing DM have found that those with  
11 severe infection were older, had more comorbidities (i.e., cerebrovascular disease, CVD,  
12 hypertension, and COPD), and increased values of inflammation, endothelial and coagulation  
13 dysfunction markers (e.g., D-dimer, procalcitonin, and thrombocytopenia), than those without DM  
14 [30- 35].

15 In our study, patients with DM had significantly higher creatinine on admission, lower eGFR, and  
16 more frequently pre-existing CKD than non-DM subjects. Besides, CKD was the only comorbid  
17 condition increasing the odds (three-fold increase) of in-hospital death (and death or IMV) among  
18 the DM cohort after adjusting for age, sex, and confounding variables. Different meta-analyses have  
19 identified CKD as a risk factor for severity and in-hospital death in SARS-CoV-2 infected patients  
20 [7, 36 -38]. Moreover, a recent study conducted in Danish hospital-diagnosed COVID-19 patients  
21 reported that kidney insufficiency was independently associated with increased risk of severe  
22 disease or death, and the degree of renal impairment inversely correlated with the rate of adverse  
23 outcomes [39]. Although it is difficult to distinguish whether poor outcomes are linked to acute  
24 kidney injury (AKI) developed during the course of the disease, or to pre-existing CKD [39], a study  
25 conducted in Spain showed that patients with increased creatinine on admission, previous CKD, or

1 developing AKI, had a higher risk of in-hospital death than those with normal creatinine on  
2 admission [40]. Of note, the authors found that older age and diabetes, but not other comorbidities,  
3 were associated with in-hospital death [40]. Finally, a study conducted in Mexico reported that,  
4 patients with DM and CKD had a 2-fold higher rate of intubation, 56% higher ICU admission, and  
5 21% excess probability of case-fatality once admitted, than subjects with CKD alone [41].

6 In our study, we used splines as a scientific and preferable alternative to the categorization of BG  
7 levels [42]. We used this approach because a recent dose-response meta-analysis demonstrated a  
8 non-linear relationship between admission fasting blood glucose (FBG) level and COVID-19  
9 severity, with high levels being significantly associated with increased mortality and poor outcome,  
10 regardless of pre-existing DM [43]. These results confirmed previous observations that FBG on  
11 admission, and the odds of being admitted to the ICU, followed a logarithmic association, with  
12 different magnitudes of risk depending on the baseline level [42]. We add to the literature that,  
13 besides the previously reported effect of hyperglycaemia on the risk of COVID-19 severity, ICU  
14 admission, and mortality [24,25], BG has a non-linear relationship with case fatality and the risk of  
15 death or IMV. It is possible that this relationship was also accompanied by, or reflected glycaemic  
16 variability and less time spent in range. Indeed, glycaemic fluctuation has been reported to be  
17 independently associated with poor prognosis and mortality in COVID-19 hospitalized patients  
18 [44]. In the same vein, a study on ICU patients showed that the less time spent in range was  
19 associated with increased utilization of a ventilator, prolonged mechanical ventilation, and  
20 increased mortality [45]. Most importantly, a spline analysis of glucose levels in DM patients with  
21 continuous glucose monitoring showed a non-linear relationship between time spent above range  
22 and glycaemic variability with the increased likelihood of composite adverse COVID-19 outcomes  
23 (need for ICU admission, mechanical ventilation, or critical illness) [46].

#### 24 *4.1 Limitations of this study*

1 The findings of this study must be interpreted with caution and a number of limitations should be  
2 borne in mind. Firstly, we had limited data for SARS-CoV-2 infected persons. For instance, we did  
3 not have access to the patient's medical history prior to admission; so the possibility exists that  
4 some important medical conditions were not included in the emergency room medical report and,  
5 therefore, not included in the analysis. Moreover, data on socio-demographic characteristics  
6 (ethnicity, race, economic or educational status) and toxic habits (smoking, alcohol or drug use)  
7 were not available. Secondly, we had very few registers for some important variables for diabetes,  
8 such as Hb1Ac (data from only 36 patients) and no data on weight or BMI. Indeed, no more than  
9 10% of the patients had documented obesity, which is clearly lower than the expected prevalence in  
10 the general population. This was most probably related to the clinician's under-recording for this  
11 particular condition and to the fact that, during the first wave, obesity had not yet been identified as  
12 a significant risk factor and thus not specifically registered. Thirdly, the selection of subjects with  
13 DM was made based on a proxy algorithm (including DM diagnosis during the hospital stay,  
14 antidiabetic treatment, and HbA1c and blood glucose levels), which could have introduced  
15 selection or referral bias, potentially leading to an inaccurate estimation of DM prevalence.  
16 Fourthly, and inherent to data coming from hospital medical records, missing values could have  
17 reduced the statistical power of the study, or produced biased estimates. Fifthly, we used random  
18 BG on admission for the spline analyses, thus preventing the distinction between stress-related  
19 hyperglycaemia and uncontrolled pre-existing DM. This also prevented the analysis of time in  
20 range or BG variability, both being linked to increased severity, case fatality, and poor COVID-19  
21 outcomes [42-46]. Lastly, the study period coincides with the height of the first pandemic wave in  
22 Spain, when there was a shortage of ventilators and intensive care beds. At this point, age was the  
23 deciding factor for whether or not someone received potentially life-saving ICU care. This might be  
24 reflected in our results, where in-hospital death was more frequent among those over 65 years, but  
25 ICU admission was more frequent among those  $\leq 65$  years.

## 1 5. Conclusions

2 The results of our study confirm the high burden associated with DM in patients hospitalized due  
3 to SARS-CoV-2 infection. Comorbid DM poses a challenge to health professionals and the system  
4 because it is associated with severe disease, higher ICU admission rates, IMV, and ultimately death,  
5 particularly among the elderly. The non-linear relationship of hyperglycaemia at admission with  
6 increased odds of death and IMV suggests that, optimizing glycaemic control during the hospital  
7 stay could help to reduce in-hospital death and the composite death/IMV. Besides, out-of-hospital  
8 care should be a priority to reduce or prevent uncontrolled glycaemia among those with DM, as it  
9 could potentially help reduce poor outcomes when hospitalization is required.

10

1  
2  
3  
4  
5  
6  
7  
8  
9  
10  
11  
12  
13  
14  
15  
16  
17  
18  
19  
20  
21  
22  
23  
24  
25  
26  
27  
28  
29  
30  
31  
32  
33  
34  
35  
36  
37  
38  
39  
40  
41  
42  
43  
44  
45  
46  
47  
48  
49  
50  
51  
52  
53  
54  
55  
56  
57  
58  
59  
60

1 **Author Contributions:** Conceptualization, E.O, J.F-N, R.C, M.M-C, B.V, K.K, D.M.; methodology, E.O, J.F-N,  
2 R.C, M.M-C, B.V, K.K, D.M.; formal analysis, R.P-T and J.R.; resources and data curation, R.P-T, J.R and B.V.;  
3 writing—original draft preparation, B.V and M.G.; writing—review and editing, E.O, J.F-N, R.C, M.M-C, M.G,  
4 X.C-C, E.C, B.V, K.K, D.M and P.D.; supervision: D.M, R.C and J.F-N.; project administration: B.V.

5 **Acknowledgements:** COVID DATA SAVE LIVES -Hospitales HM for providing database. CIBER of Diabetes  
6 and Associated Metabolic Diseases (CIBERDEM) and CIBER of physiopathology of obesity and Nutrition  
7 (CIBEROBN) are initiatives from the Instituto de Salud Carlos III, Madrid, Spain. The authors acknowledge  
8 Amanda Prowse (Lochside Medical communications Ltd.) for providing support in paper editing. KK is  
9 supported by the National Institute for Health Research (NIHR) Applied Research Collaboration East  
10 Midlands (ARC EM) and the NIHR Leicester Biomedical Research Centre (BRC).

11 **Funding:** This study was supported by the Primary Care Diabetes Europe grant (grant number FEr20/0020)

12 **Data availability:** Data may be obtained from a third party and are not publicly available.

13 **Conflicts of interest:** The funders had no role in the design of the study; in the collection, analyses, or  
14 interpretation of data; in the writing of the manuscript, or in the decision to publish the results.

15 E.O. has received advisory and or speaking fees from Astra-Zeneca, Boehringer Ingelheim, Lilly, MSD, Novo  
16 Nordisk, Sanofi, and Amgen; they received research grants to the institution from MSD and Amgen.

17 R.C. has received advisory and/or speaking fees from Abbott, Ascensia, Lilly, MSD, Novo Nordisk and Sanofi.

18 M. M-C. has received advisory honorarium from Astra-Zeneca, Bayer, Boehringer Ingelheim, GSK, Lilly, MSD,  
19 Novartis, Novo Nordisk, and Sanofi; they received speaker honoraria from Astra-Zeneca, Bayer, Boehringer  
20 Ingelheim, GSK, Lilly, Menarini, MSD, Novartis, Novo Nordisk, and Sanofi; they received research grants to  
21 the institution from Astra-Zeneca, GSK, Lilly, MSD, Novartis, Novo Nordisk, and Sanofi.

22 J. F-N has received advisory and or speaking fees from Astra-Zeneca, Ascensia, Boehringer Ingelheim, GSK,  
23 Lilly, MSD, Novartis, Novo Nordisk, and Sanofi; they received research grants to the institution from Astra-  
24 Zeneca, GSK, Lilly, MSD, Novartis, Novo Nordisk, Sanofi, and Boehringer.

25 K.K. has acted as a consultant, speaker or received grants for investigator-initiated studies for Astra Zeneca,  
26 Novartis, Novo Nordisk, Sanofi-Aventis, Lilly and Merck Sharp & Dohme, Boehringer Ingelheim, Bayer,  
27 Berlin-Chemie AG / Menarini Group, Janssen, and Napp

28 D. M. has received advisory and/or speaking fees from Astra-Zeneca, Ascensia, Boehringer Ingelheim, GSK,  
29 Lilly, MSD, Novartis, Novo Nordisk, and Sanofi; they received research grants to the institution from Astra-  
30 Zeneca, GSK, Lilly, MSD, Novartis, Novo Nordisk, Sanofi, and Boehringer.

31 P. D. has received lecture and Advisory Board fees from Gilead Sciences, Roche, Merck, Sharp & Dohme, ViiV  
32 Healthcare, Janssen & Cilag, Theratechnologies, Boehringer Ingelheim, and Ferrer International. P.D. has  
33 received research grants from Gilead Sciences, ViiV Healthcare, GSK, Janssen & Cilag, and Boehringer  
34 Ingelheim.

35 B. V, X.C-C, J.R, R.P-T, M.G, and E.C. have no conflict of interest to declare.

36

## References

1. World Health Organization. 15-Novel Coronavirus(2019-nCoV). WHO Bull 2020; 1–7.
2. Agència de Salut Pública de Catalunya (ASPCAT). Informe tècnic resum dels casos de covid-19 a Catalunya, [http://salutpublica.gencat.cat/web/.content/minisite/aspcat/butlletins/vigilanciaaspcat/2020/45/INF-ORME-TECNIC-3-COVID-19\\_020420.pdf](http://salutpublica.gencat.cat/web/.content/minisite/aspcat/butlletins/vigilanciaaspcat/2020/45/INF-ORME-TECNIC-3-COVID-19_020420.pdf) (2020).
3. Linde, Pablo (February 1, 2020). «Sanidad confirma en La Gomera el primer caso de coronavirus en España». El País. ISSN 1134-6582. Consulted March 10, 2020. Available from: [https://elpais.com/sociedad/2020/01/31/actualidad/1580509404\\_469734.htm](https://elpais.com/sociedad/2020/01/31/actualidad/1580509404_469734.htm)
4. Muniyappa R, Gubbi S. COVID-19 pandemic, coronaviruses, and diabetes mellitus. *American Journal of Physiology-Endocrinology and Metabolism* 2020;318(5):E736-E741.
5. Zhou Y, Yang Q, Chi J, *et al.* Comorbidities and the risk of severe or fatal outcomes associated with coronavirus disease 2019: A systematic review and meta-analysis. *Int J Infect Dis* 2020; 99: 47–56.
6. Deng G, Yin M, Chen X, *et al.* Clinical determinants for fatality of 44,672 patients with COVID-19. *Crit Care* 2020; 24: 179.
7. Mesas AE, Cavero-Redondo I, Álvarez-Bueno C, *et al.* Predictors of in-hospital COVID-19 mortality: A comprehensive systematic review and meta-analysis exploring differences by age, sex and health conditions. *PLoS One* 2020; 15: e0241742.
8. Pendu J Le, Breiman A, Rocher J, *et al.* ABO Blood Types and COVID-19: Spurious, Anecdotal, or Truly Important Relationships? A Reasoned Review of Available Data. *Viruses* 2021;13:160. doi:10.3390/v13020160
9. Sardu C, Marfella R, Maggi P, *et al.* Implications of ABO blood group in hypertensive patients with covid-19. *BMC Cardiovasc Disord* 2020;20:373. doi:10.1186/s12872-020-01658-z
10. Hoffmann M, Kleine-Weber H, Schroeder S, *et al.* SARS-CoV-2 Cell Entry Depends on ACE2 and TMPRSS2 and Is Blocked by a Clinically Proven Protease Inhibitor. *Cell* 2020;181:271-280.e8. doi:10.1016/j.cell.2020.02.052
11. Baral R, Tsampasian V, Debski M, *et al.* Association Between Renin-Angiotensin-Aldosterone System Inhibitors and Clinical Outcomes in Patients With COVID-19. *JAMA Netw Open* 2021;4:e213594. doi:10.1001/jamanetworkopen.2021.3594
12. Matarese A, Gambardella J, Sardu C, *et al.* miR-98 Regulates TMPRSS2 Expression in Human Endothelial Cells: Key Implications for COVID-19. *Biomedicines* 2020;8:462. doi:10.3390/biomedicines8110462
13. Papazafiropoulou AK, Antonopoulos S. The COVID-19 pandemic and diabetes mellitus. *Archives of Medical Sciences. Atherosclerotic Diseases* 2020;5:e200.
14. McDonald HI, Nitsch D, Millett E, Sinclair A, Thomas SL. New estimates of the burden of acute community-acquired infections among older people with diabetes mellitus: a retrospective cohort study using linked electronic health records. *Diabetic Med* 2014;31(5):606-614.



- 1  
2  
3  
4 1 15. Li S, Wang J, Zhang B, Li X, Liu Y. Diabetes mellitus and cause-specific mortality: a population-  
5 2 based study. *Diabetes & metabolism journal* 2019;43(3):319-341.
- 6  
7 3 16. Del Sole F, Farcomeni A, Loffredo L, Carnevale R, Menichelli D, Vicario T, *et al.* Features of  
8 4 severe COVID-19: A systematic review and meta-analysis. *Eur J Clin Invest* 2020;50:0-1.  
9 5 <https://doi.org/10.1111/eci.13378>.
- 10  
11 6 17. Pugliese G, Vitale M, Resi V, Orsi E. Is diabetes mellitus a risk factor for COroNaVirus Disease  
12 7 19 (COVID-19)? *Acta Diabetol* 2020;19. <https://doi.org/10.1007/s00592-020-01586-6>.
- 13  
14 8 18. Peric S, Stulnig TM. Diabetes and COVID-19. *Wien Klin Wochenschr* 2020;132:356-61.  
15 9 [doi:10.1007/s00508-020-01672-3](https://doi.org/10.1007/s00508-020-01672-3)
- 16  
17 10 19. Barron E, Bakhai C, Kar P, Weaver A, Bradley D, Ismail H, *et al.* Associations of type 1 and type  
18 11 2 diabetes with COVID-19-related mortality in England: a whole-population study. *The Lancet*  
19 12 *Diabetes & Endocrinology* 2020.
- 20  
21 13 20. Tian W, Jiang W, Yao J, Nicholson CJ, Li RH, Sigurslid HH, *et al.* Predictors of mortality in  
22 14 hospitalized COVID-19 patients: A systematic review and meta-analysis. *J Med Virol* 2020.
- 23  
24 15 21. Mantovani A, Byrne CD, Zheng M, Targher G. Diabetes as a risk factor for greater COVID-19  
25 16 severity and in-hospital death: A meta-analysis of observational studies. *Nutrition, Metabolism and*  
26 17 *Cardiovascular Diseases* 2020;30(8):1236-1248.
- 27  
28 18 22. Wu C, Chen X, Cai Y, *et al.* Risk Factors Associated With Acute Respiratory Distress Syndrome  
29 19 and Death in Patients With Coronavirus Disease 2019 Pneumonia in Wuhan, China. *JAMA Intern*  
30 20 *Med* 2020;180:934-43.
- 31  
32 21 23. Li X, Xu S, Yu M, *et al.* Risk factors for severity and mortality in adult COVID-19 inpatients in  
33 22 Wuhan. *J Allergy Clin Immunol* 2020;146:110-8.
- 34  
35 23 24. Lee MH, Wong C, Ng CH, Yuen DCW, Lim AYL, Khoo CM. Effects of hyperglycaemia on  
36 24 complications of COVID-19: A meta-analysis of observational studies. *Diabetes Obes Metab*  
37 25 2021;23:287-9.
- 38  
39 26 25. Yang Y, Cai Z, Zhang J. Hyperglycemia at admission is a strong predictor of mortality and  
40 27 severe/critical complications in COVID-19 patients: a meta-analysis. *Biosci Rep* 2021;41.
- 41  
42 28 26. Marfella R, Paolisso P, Sardu C, *et al.* Negative impact of hyperglycaemia on tocilizumab  
43 29 therapy in Covid-19 patients. *Diabetes Metab* 2020;46:403-5.
- 44  
45 30 27. Soriguer F, Goday A, Bosch-Comas A, Bordiú E, Calle-Pascual A, Carmena R, *et al.* Prevalence of  
46 31 diabetes mellitus and impaired glucose regulation in Spain: the Di@bet.es Study. *Diabetologia* 2012;  
47 32 55(1):88-93.
- 48  
49 33 28. Caballero AE, Ceriello A, Misra A, *et al.* COVID-19 in people living with diabetes: An  
50 34 international consensus. *J Diabetes Complications* 2020; 34: 107671.
- 51  
52 35 29. Wood S (2019) mgcv: mixed GAM computation vehicle with automatic smoothness estimation.  
53 36 R-package version 1.8-31. <https://CRAN.R-project.org/package=mgcv>
- 54  
55 37 30. Li G, Deng Q, Feng J, Li F, Xiong N, He Q. Clinical Characteristics of Diabetic Patients with  
56 38 COVID-19. *J Diabetes Res* 2020;2020:1652403. <https://doi.org/10.1155/2020/1652403>.
- 57  
58 39  
59 40  
60

- 1  
2  
3  
4 1 31. Izcovich A, Ragusa MA, Tortosa F, *et al.* Prognostic factors for severity and mortality in patients  
5 2 infected with COVID-19: A systematic review. *PLoS One* 2020; 15: e0241955.
- 6  
7 3 32. Cariou B, Hadjadj S, Wargny M, Pichelin M, Al-Salameh A, Allix I, *et al.* Phenotypic  
8 4 characteristics and prognosis of inpatients with COVID-19 and diabetes: the CORONADO study.  
9 5 *Diabetologia* 2020;63:1500–15. <https://doi.org/10.1007/s00125-020-05180-x>.
- 10  
11 6 33. Zhu L, She Z-G, Cheng X, *et al.* Association of Blood Glucose Control and Outcomes in Patients  
12 7 with COVID-19 and Pre-existing Type 2 Diabetes. *Cell Metab* 2020; 31: 1068-1077.e3.
- 13  
14 8 34. Elamari S, Motaib I, Zbiri S, *et al.* Characteristics and outcomes of diabetic patients infected by  
15 9 the SARS-CoV-2. *Pan Afr Med J*; 37. Epub ahead of print 2020. DOI: 10.11604/pamj.2020.37.32.25192.
- 16  
17 10 35. Yan Y, Yang Y, Wang F, *et al.* Clinical characteristics and outcomes of patients with severe covid-  
18 11 19 with diabetes. *BMJ Open Diabetes Res Care* 2020; 8: e001343.
- 20  
21 12 36. Laguna-Goya R, Utrero-Rico A, Talayero P, *et al.* IL-6–based mortality risk model for  
22 13 hospitalized patients with COVID-19. *J Allergy Clin Immunol* 2020; 146: 799-807.e9.
- 23  
24 14 37. Working group for the surveillance and control of COVID-19 in Spain. Redondo-Bravo L, *et al.*  
25 15 The first wave of the COVID-19 pandemic in Spain: characterisation of cases and risk factors for  
26 16 severe outcomes, as at 27 April 2020. *Eurosurveillance* 2020;25:2001431. doi:10.2807/1560-  
27 17 7917.ES.2020.25.50.2001431
- 28  
29 18 38. Tian W, Jiang W, Yao J, *et al.* Predictors of mortality in hospitalized COVID-19 patients: A  
30 19 systematic review and meta-analysis. *J Med Virol* 2020; 92: 1875–1883.
- 31  
32 20 39. Carlson N, Nelveg-Kristensen K -E., Freese Ballegaard E, *et al.* Increased vulnerability to  
33 21 COVID-19 in chronic kidney disease. *J Intern Med* 2021; joim.13239.
- 34  
35 22 40. Portolés J, Marques M, López-Sánchez P, *et al.* Chronic kidney disease and acute kidney injury  
36 23 in the COVID-19 Spanish outbreak. *Nephrol Dial Transplant* 2020; 35: 1353–1361.
- 37  
38 24 41. Leon-Abarca JA, Memon RS, Rehan B, *et al.* The impact of COVID-19 in diabetic kidney disease  
39 25 and chronic kidney disease: A population-based study. medrxiv. Epub ahead of print 2020. DOI:  
40 26 <https://doi.org/10.1101/2020.09.12.20193235>.
- 41  
42 27 42. Alahmad B, Al-Shammari AA, Bennakhi A, *et al.* Fasting Blood Glucose and COVID-19 Severity:  
43 28 Nonlinearity Matters. *Diabetes Care* 2020; 43: 3113–3116.
- 44  
45 29 43. Lazarus G, Audrey J, Wangsaputra VK, *et al.* High admission blood glucose independently  
46 30 predicts poor prognosis in COVID-19 patients: A systematic review and dose-response meta-  
47 31 analysis. *Diabetes Res Clin Pract* 2021; 171: 108561.
- 48  
49 32 44. Chen L, Sun W, Liu Y, *et al.* Association of Early-Phase In-Hospital Glycemic Fluctuation With  
50 33 Mortality in Adult Patients With Coronavirus Disease 2019. *Diabetes Care* 2021; dc200780.
- 51  
52 34 45. Kapoor R, Timsina LR, Gupta N, *et al.* Maintaining Blood Glucose Levels in Range (70–150  
53 35 mg/dL) is Difficult in COVID-19 Compared to Non-COVID-19 ICU Patients—A Retrospective  
54 36 Analysis. *J Clin Med* 2020; 9: 3635.
- 55  
56  
57  
58  
59  
60

1  
2  
3  
4  
5  
6  
7  
8  
9  
10  
11  
12  
13  
14  
15  
16  
17  
18  
19  
20  
21  
22  
23  
24  
25  
26  
27  
28  
29  
30  
31  
32  
33  
34  
35  
36  
37  
38  
39  
40  
41  
42  
43  
44  
45  
46  
47  
48  
49  
50  
51  
52  
53  
54  
55  
56  
57  
58  
59  
60

1 46. Shen Y, Fan X, Zhang L, *et al.* Thresholds of Glycemia and the Outcomes of COVID-19  
2 Complicated With Diabetes: A Retrospective Exploratory Study Using Continuous Glucose  
3 Monitoring. *Diabetes Care* 2021; dc201448.

4  
5

For peer review only

1 **Table 1.** Baseline characteristics of the studied cohorts at hospital admission

| Characteristic                        | Overall study population<br>N=2069 | Diabetes<br>N=448 | No diabetes<br>N=1621 | p-value |
|---------------------------------------|------------------------------------|-------------------|-----------------------|---------|
| Age, mean (SD), years                 | 67.8 (15.7)                        | 71.7 (11.9)       | 66.6 (16.3)           | <0.001  |
| Age, median (P25, P75), years         | 69.0 (57.0, 80.0)                  | 72.0 (64.0; 80.0) | 67.0 (55.0; 79.0)     | <0.001  |
| Sex (male), n (%)                     | 1205 (60.3)                        | 304 (67.9)        | 950 (58.6)            | <0.001  |
| Glucose, mean, (SD)                   |                                    |                   |                       |         |
| mg/dL                                 | 124 (47.7)                         | 168 (74.4)        | 112 (24.8)            | <0.001  |
| mmol/L                                | 6.8(2.6)                           | 9.3 (4.1)         | 6.2 (1.4)             |         |
| <b>Comorbidities, n (%)</b>           |                                    |                   |                       |         |
| Hypertension                          | 651 (31.5)                         | 224 (50.0)        | 427 (26.3)            | <0.001  |
| Hyperlipidaemia                       | 409 (19.8)                         | 154 (34.4)        | 255 (15.7)            | <0.001  |
| Obesity                               | 117 (5.65)                         | 45 (10.0)         | 72 (4.44)             | <0.001  |
| Cardiovascular diseases               | 77 (3.72)                          | 28 (6.25)         | 49 (3.02)             | 0.002   |
| Heart failure                         | 51 (2.46)                          | 18 (4.02)         | 33 (2.04)             | 0.026   |
| Cerebrovascular diseases              | 27 (1.30)                          | 10 (2.23)         | 17 (1.05)             | 0.086   |
| Ischemic heart disease                | 47 (2.27)                          | 18 (4.02)         | 29 (1.79)             | 0.009   |
| Chronic kidney disease                | 76 (3.67)                          | 30 (6.70)         | 46 (2.84)             | <0.001  |
| Chronic obstructive pulmonary disease | 112 (5.41)                         | 34 (7.59)         | 78 (4.81)             | 0.029   |
| Asthma                                | 2 (0.10)                           | 0 (0.00)          | 2 (0.12)              | 1.000   |
| Mental disorders                      | 114 (5.51)                         | 35 (7.81)         | 79 (4.87)             | 0.022   |
| Cancer                                | 117 (5.65)                         | 36 (8.04)         | 81 (5.00)             | 0.019   |
| <b>Pharmacological therapy, n (%)</b> |                                    |                   |                       |         |
| Biguanides                            | 66 (3.19)                          | 66 (14.7)         | 0 (0.00)              | <0.001  |
| Sulfonylureas                         | 1 (0.05)                           | 1 (0.22)          | 0 (0.00)              | 0.217   |
| Dipeptidyl peptidase 4 inhibitors     | 11 (0.53)                          | 11 (2.46)         | 0 (0.00)              | <0.001  |
| Fast-acting insulins                  | 95 (4.5)                           | 66 (14.7)         | 29 (1.79)             | <0.001  |
| Intermediate-acting insulins          | 9 (0.43)                           | 7 (1.56)          | 2 (0.12)              | 0.001   |
| Long-acting insulins                  | 23 (1.11)                          | 20 (4.46)         | 3 (0.19)              | <0.001  |
| Antibiotics                           | 1882 (91.0)                        | 421 (94.0)        | 1461 (90.1)           | 0.016   |
| Antithrombotics                       | 1752 (84.7)                        | 396 (88.4)        | 1356 (83.7)           | 0.017   |
| Renin-angiotensin system agents       | 523 (25.3)                         | 153 (34.2)        | 370 (22.8)            | <0.001  |
| Beta blocking agents                  | 316 (15.3)                         | 104 (23.2)        | 212 (13.1)            | <0.001  |
| Calcium channel blockers              | 384 (18.6)                         | 118 (26.3)        | 266 (16.4)            | <0.001  |
| Diuretics                             | 508 (24.6)                         | 185 (41.3)        | 323 (19.9)            | <0.001  |
| Statins                               | 256 (12.4)                         | 88 (19.6)         | 168 (10.4)            | <0.001  |
| Systemic corticosteroids              | 977 (47.2)                         | 267 (59.6)        | 710 (43.8)            | <0.001  |
| Tocilizumab                           | 421 (20.3)                         | 137 (30.6)        | 284 (17.5)            | <0.001  |

DM, diabetes mellitus; P25, P75, 25<sup>th</sup> and 75<sup>th</sup> percentile, respectively; SD, standard deviation

## Figure legend/caption

**Figure 1.** Flowchart diagram

**Figure 2.** Proportion of events (%) during hospitalization according to the presence of diabetes.

Legend: ARDS, acute respiratory distress syndrome; DM, diabetes mellitus; ICU, intensive care unit; IMV, invasive mechanical ventilation. \*\*\*  $p < 0.001$ ; \*\*  $p < 0.01$ ; \*  $p < 0.05$

**Figure 3.** Clinical and demographic variables associated with increased risk of in-hospital death and the composite outcome of death or invasive mechanical ventilation.

Legend: CKD, chronic kidney disease; COPD, chronic obstructive pulmonary disease; CVD, cardiovascular disease; DM, diabetes mellitus; HF, heart failure; IMV, invasive mechanical ventilation

**Figure 4.** Clinical and demographic variables associated with increased risk of in-hospital death and the composite outcome of death and/or invasive mechanical ventilation in subjects with diabetes (A) and without diabetes (B).

Legend: CKD, chronic kidney disease; COPD, chronic obstructive pulmonary disease; CVD, cardiovascular disease; DM, diabetes mellitus; HF, heart failure; IMV, invasive mechanical ventilation

**Figure 5.** Spline plot demonstrating a marked non-linearity in the relationship between plasma glucose (mg/dL) levels on admission and the log odds of death (A) and death or invasive mechanical ventilation (IMV) rate (B). Tick marks above the horizontal axis indicate the values at which the observations were made. The dotted lines represent the 95% confidence interval. The model was adjusted for age, sex, obesity, hypertension, hyperlipidaemia, history of CVD, HF, CKD, and COPD.

Legend: IMV, intensive mechanical ventilation; CVD, cardiovascular disease; HF, heart failure; CKD, chronic kidney disease; COPD, chronic obstructive pulmonary disease

**Figure 6.** Predicted probability of in-hospital death (A) and death or IMV (B) based on generalized smoothing splines. The shaded area represents the 95% confidence interval. The model was adjusted for age, sex, obesity, hypertension, hyperlipidaemia, history of CVD, HF, CKD, and COPD

Legend: IMV, intensive mechanical ventilation; CVD, cardiovascular disease; HF, heart failure; CKD, chronic kidney disease; COPD, chronic obstructive pulmonary disease

1  
2  
3  
4  
5  
6  
7  
8  
9  
10  
11  
12  
13  
14  
15  
16  
17  
18  
19  
20  
21  
22  
23  
24  
25  
26  
27  
28  
29  
30  
31  
32  
33  
34  
35  
36  
37  
38  
39  
40  
41  
42  
43  
44  
45  
46  
47  
48  
49  
50  
51  
52  
53  
54  
55  
56  
57  
58  
59  
60

1  
2 **Supplement figure legend/caption**  
3

4 **Supplementary Figure 1.** Proportion of events (%) during hospitalization according to the presence  
5 of diabetes and age group (A) and sex (B).

6  
7 Legend: ARDS, acute respiratory distress syndrome; DM, diabetes mellitus; ICU, intensive care  
8 unit; IMV, invasive mechanical ventilation. \*\*\* p<0.001; \*\* p<0.01; \* p<0.05  
9  
10  
11  
12

For peer review only

1  
2  
3  
4  
5  
6  
7  
8  
9  
10  
11  
12  
13  
14  
15  
16  
17  
18  
19  
20  
21  
22  
23  
24  
25  
26  
27  
28  
29  
30  
31  
32  
33  
34  
35  
36  
37  
38  
39  
40  
41  
42  
43  
44  
45  
46  
47  
48  
49  
50  
51  
52  
53  
54  
55  
56  
57  
58  
59  
60

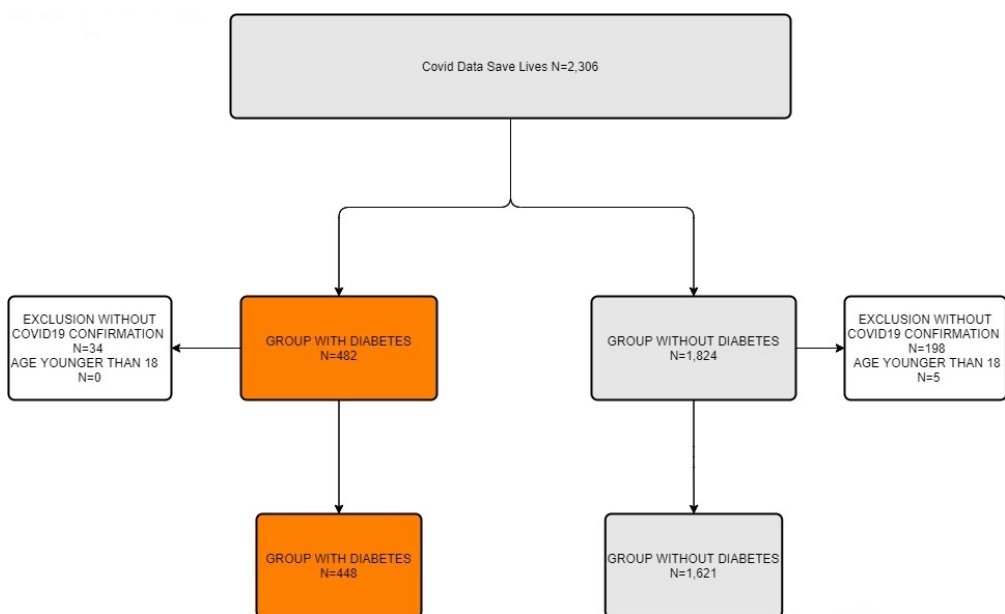

Figure 1. Flowchart diagram

255x154mm (96 x 96 DPI)

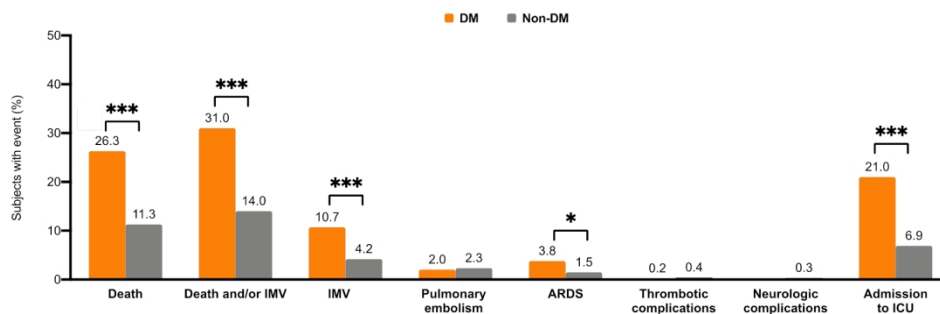

Figure 2. Proportion of events (%) during hospitalization according to the presence of diabetes.

Legend: ARDS, acute respiratory distress syndrome; DM, diabetes mellitus; ICU, intensive care unit; IMV, invasive mechanical ventilation. \*\*\* p<0.001; \*\* p<0.01; \* p<0.05

491x163mm (96 x 96 DPI)



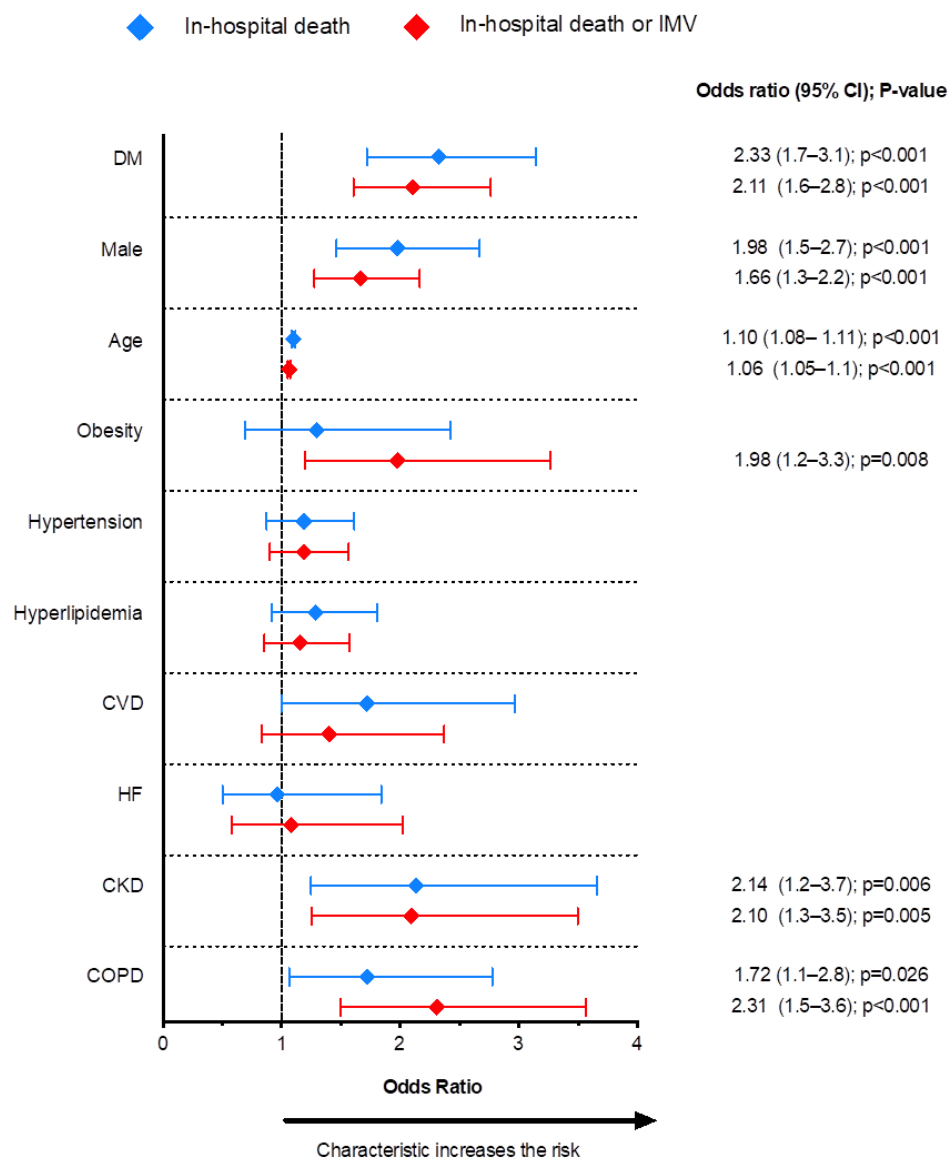

Figure 3. Clinical and demographic variables associated with increased risk of in-hospital death and the composite outcome of death or invasive mechanical ventilation.

Legend: CKD, chronic kidney disease; COPD, chronic obstructive pulmonary disease; CVD, cardiovascular disease; DM, diabetes mellitus; HF, heart failure; IMV, invasive mechanical ventilation

233x285mm (96 x 96 DPI)

**A. Subjects with diabetes**

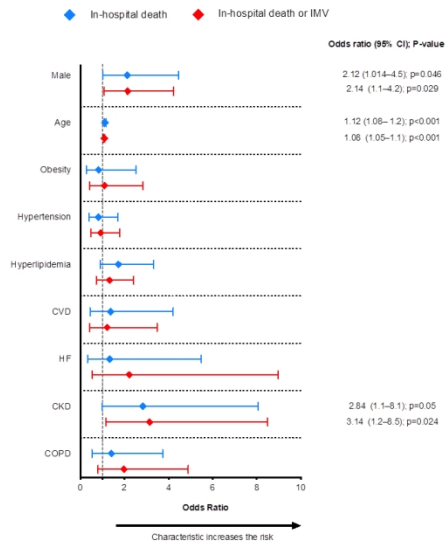

**B. Subjects without diabetes**

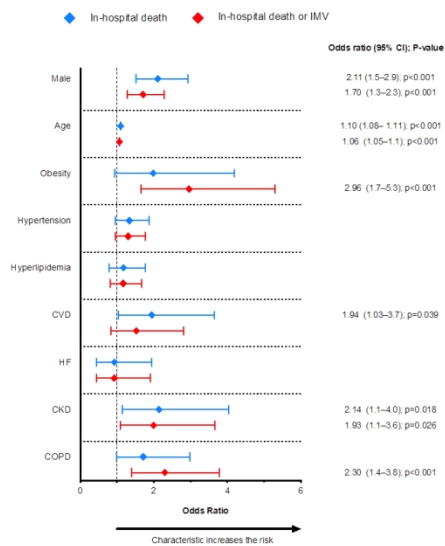

Figure 4. Clinical and demographic variables associated with increased risk of in-hospital death and the composite outcome of death and/or invasive mechanical ventilation in subjects with diabetes (A) and without diabetes (B).

Legend: CKD, chronic kidney disease; COPD, chronic obstructive pulmonary disease; CVD, cardiovascular disease; DM, diabetes mellitus; HF, heart failure; IMV, invasive mechanical ventilation

218x505mm (96 x 96 DPI)

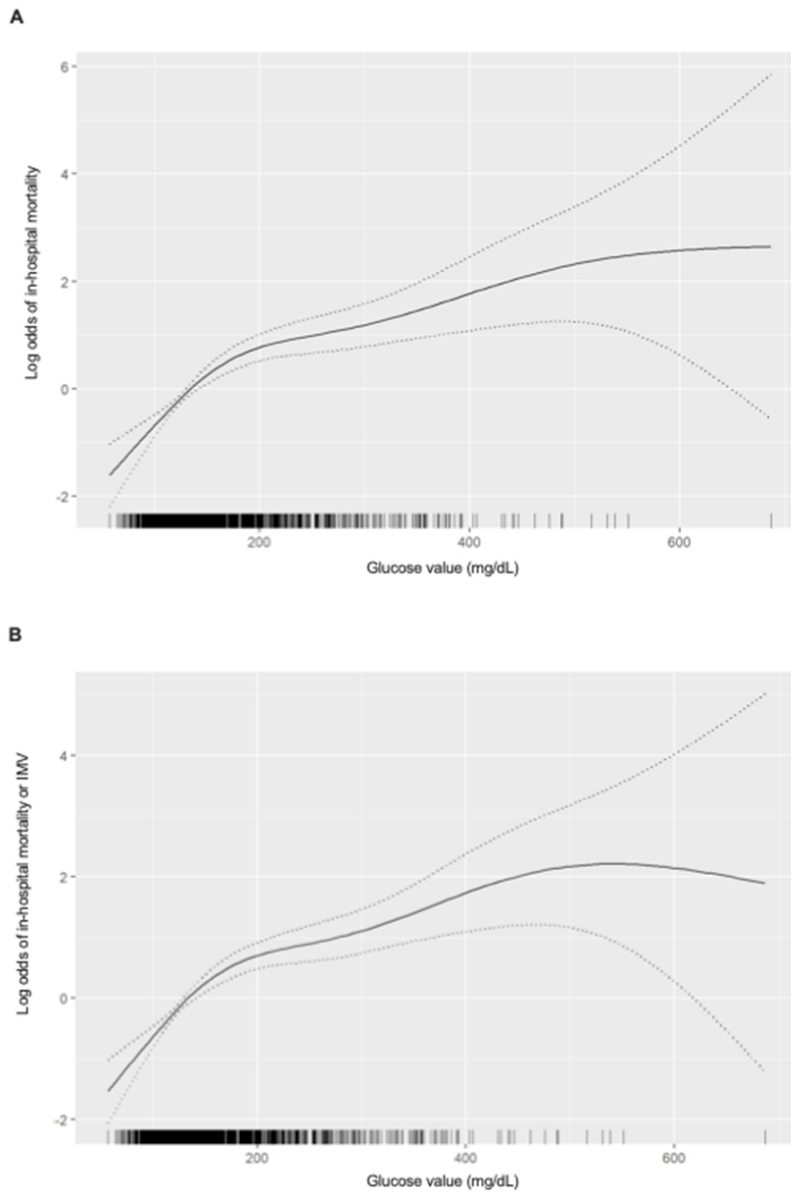

45 Figure 5. Spline plot demonstrating a marked non-linearity in the relationship between plasma glucose  
46 (mg/dL) levels on admission and the log odds of death (A) and death or invasive mechanical ventilation  
47 (IMV) rate (B). Tick marks above the horizontal axis indicate the values at which the observations were  
48 made. The dotted lines represent the 95% confidence interval. The model was adjusted for age, sex,  
49 obesity, hypertension, hyperlipidaemia, history of CVD, HF, CKD, and COPD.

50 Legend: IMV, intensive mechanical ventilation; CVD, cardiovascular disease; HF, heart failure; CKD, chronic  
51 kidney disease; COPD, chronic obstructive pulmonary disease

52 219x323mm (96 x 96 DPI)

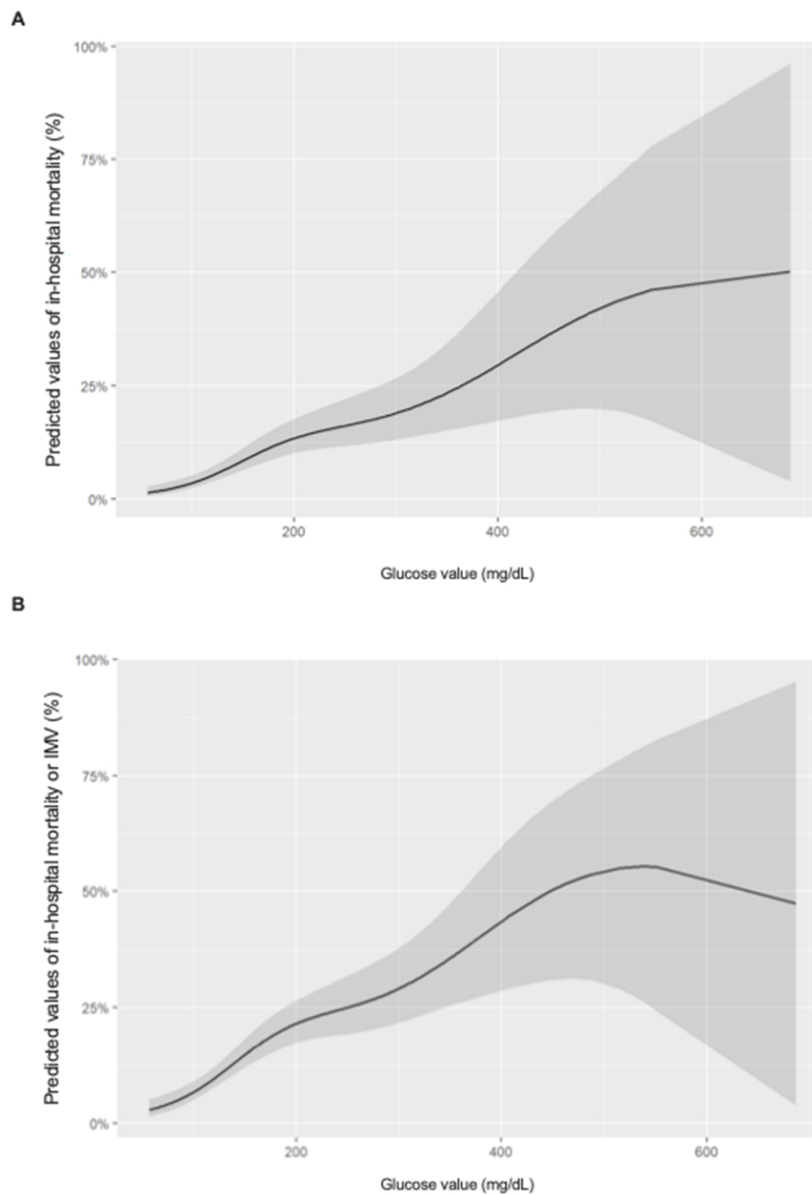

Figure 6. Predicted probability of in-hospital death (A) and death or IMV (B) based on generalized smoothing splines. The shaded area represents the 95% confidence interval. The model was adjusted for age, sex, obesity, hypertension, hyperlipidaemia, history of CVD, HF, CKD, and COPD

Legend: IMV, intensive mechanical ventilation; CVD, cardiovascular disease; HF, heart failure; CKD, chronic kidney disease; COPD, chronic obstructive pulmonary disease

231x333mm (96 x 96 DPI)

## ONLINE-ONLY SUPPLEMENTARY MATERIALS

These supplemental materials have been provided by the authors to give the readers additional information about the study.

# Risk factors for severe outcomes in people with diabetes hospitalized for COVID-19: A cross-sectional “Covid Data Save Lives” database study

Emilio Ortega <sup>1,2,3</sup>, Rosa Corcoy <sup>4,5,6</sup>, Mònica Gratacòs<sup>1</sup>, Xavier Cos-Claramunt <sup>1,7</sup>, Manel Mata-Cases <sup>1,8,10</sup>, Ramon Puig-Treserra<sup>1</sup>, Jordi Real <sup>1</sup>, Bogdan Vlacho <sup>1</sup>, Esmeralda Castelblanco <sup>1,8</sup>, Pere Domingo <sup>9</sup>, Kamlesh Khunti <sup>11</sup>, Josep Franch-Nadal <sup>1,8,12\*</sup> and Dídac Mauricio <sup>1,4,8,13\*</sup>

### TABLE OF CONTENTS

|                                |                                                                                                                                                                                                                 | PAGE |
|--------------------------------|-----------------------------------------------------------------------------------------------------------------------------------------------------------------------------------------------------------------|------|
| <b>Supplementary Table 1</b>   | Basal vital signs and laboratory measurements of patients admitted for coronavirus according to the presence of diabetes mellitus                                                                               | 2    |
| <b>Supplementary Figure 1.</b> | Proportion of events (%) during hospitalization according to the presence of diabetes and age group (A) and sex (B).                                                                                            | 4    |
| <b>Supplementary Table 2.</b>  | Number of events in patients with pre-existing diabetes and stress hyperglycaemia/unknown diabetes.                                                                                                             | 5    |
| <b>Supplementary Table 3.</b>  | Clinical characteristics at baseline as predictors of death vs death or invasive mechanical ventilation according to the model with all potential independent variables included.                               | 6    |
| <b>Supplementary Table 4.</b>  | Mortality model evaluating diabetes and interactions with other clinical comorbid conditions regarding the outcome of death.                                                                                    | 7    |
| <b>Supplementary Table 5.</b>  | Clinical characteristics at baseline associated with in-hospital death stratified for diabetes status (model 3, namely the model with all demographic and clinical variables included).                         | 8    |
| <b>Supplementary Table 6.</b>  | Clinical characteristics at baseline associated to in-hospital death or mechanical ventilation stratified for diabetes status (model 3, namely the model with all demographic and clinical variables included). | 9    |
| <b>Supplementary Table 7.</b>  | Multivariate model of the association between predictors and the odds of death and death or invasive mechanical ventilation based on the nonlinear glucose curve.                                               | 10   |
| <b>Supplementary text</b>      | Database description.                                                                                                                                                                                           | 11   |

**Supplementary Table 1.** Basal vital signs and laboratory measurements of patients admitted for coronavirus according to the presence of diabetes mellitus

|                                                                        | <b>Diabetes<br/>N=448</b> | <b>No diabetes<br/>N=1621</b> | p-value |
|------------------------------------------------------------------------|---------------------------|-------------------------------|---------|
| <b>Vital signs</b>                                                     |                           |                               |         |
| Systolic blood arterial pressure, mean (SD), mmHg                      | 128 (19.7)                | 123 (19.3)                    | 0.037   |
| Diastolic blood arterial pressure, mean (SD), mmHg                     | 72.0 (12.1)               | 71.1 (12.5)                   | 0.501   |
| Heart rate, mean (SD), bpm                                             | 80.2 (14.7)               | 79.4 (14.9)                   | 0.641   |
| Temperature, mean (SD), °C                                             | 36.5 (0.823)              | 36.5 (0.805)                  | 0.086   |
| <b>Basal laboratory measurements</b>                                   |                           |                               |         |
| <b>Renal function</b>                                                  |                           |                               |         |
| Glomerular filtration (CKD-EPI), mean (SD), mL/min/1.73 m <sup>2</sup> | 73.5 (26.5)               | 81.2 (23.9)                   | <0.001  |
| Creatinine, mean (SD), mg/dL                                           | 1.09 (0.716)              | 0.943 (0.510)                 | <0.001  |
| <b>Inflammation markers</b>                                            |                           |                               |         |
| Procalcitonin, mean (SD), ng/mL                                        | 0.661 (1.30)              | 0.387 (1.30)                  | <0.001  |
| C-reactive protein, mean (SD), mg/L                                    | 97.1 (107)                | 75.9 (82.5)                   | <0.001  |
| <b>Other biochemical markers</b>                                       |                           |                               |         |
| D-dimer, mean (SD), ng/mL                                              | 3990 (10800)              | 2340 (6720)                   | <0.001  |
| <b>Liver function</b>                                                  |                           |                               |         |
| Alkaline phosphatase, mean (SD), U/L                                   | 78.3 (39.1)               | 78.6 (62.3)                   | 0.984   |
| Lactate dehydrogenase, mean (SD), U/L                                  | 644 (399)                 | 575 (311)                     | <0.001  |
| Gamma-glutamyl transferase, mean (SD), U/L                             | 93.8 (135)                | 88.4 (123)                    | 0.804   |
| Aspartate aminotransferase, mean (SD), U/L                             | 49.6 (165)                | 42.7 (57.8)                   | 0.022   |
| Alanine aminotransferase, mean (SD), U/L                               | 51.7 (136)                | 45.1 (60.6)                   | 0.354   |
| <b>Haematology parameters</b>                                          |                           |                               |         |
| Haemoglobin, mean (SD), g/dL                                           | 13.1 (2.09)               | 13.6 (1.84)                   | 0.433   |
| Leucocytes, mean (SD), x10 <sup>3</sup> /μL                            | 8.91 (6.52)               | 7.47 (4.17)                   | <0.001  |
| Platelets, mean (SD), x10 <sup>3</sup> /μL                             | 247 (112)                 | 250 (116)                     | 0.705   |

|                                           |              |              |        |
|-------------------------------------------|--------------|--------------|--------|
| Monocytes, mean (SD), %                   | 7.21 (5.29)  | 8.19 (3.91)  | <0.001 |
| Lymphocytes, mean (SD), %                 | 15.6 (10.0)  | 19.0 (10.9)  | <0.001 |
| Neutrophils, mean (SD), %                 | 76.1 (13.5)  | 71.8 (13.5)  | <0.001 |
| Prothrombin time, mean (SD), s            | 15.6 (15.6)  | 14.8 (10.5)  | 0.076  |
| <b>Electrolytes</b>                       |              |              |        |
| Phosphorus, mean (SD), mg/dL              | 3.39 (0.971) | 3.15 (0.731) | 0.026  |
| Sodium, mean (SD), mg/dL                  | 138 (6.41)   | 138 (4.35)   | 0.537  |
| Calcium, mean (SD), mg/dL                 | 8.31 (0.648) | 8.39 (0.574) | 0.102  |
| <b>Blood gases</b>                        |              |              |        |
| CO <sub>2</sub> pressure, mean (SD), mmHg | 37.8 (9.95)  | 35.8 (7.42)  | 0.007  |
| O <sub>2</sub> pressure, mean (SD), mmHg  | 73.4 (35.4)  | 67.5 (30.9)  | 0.216  |
| O <sub>2</sub> saturation, mean (SD), %   | 90.3 (11.4)  | 89.1 (13.6)  | 0.694  |

CKD-EPI, Glomerular filtration rate estimate based on the CKD-EPI (Chronic Kidney Disease Epidemiology Collaboration) equation.

**Supplementary Figure 1.** Proportion of events (%) during hospitalization according to the presence of diabetes and age group (A) and sex (B).

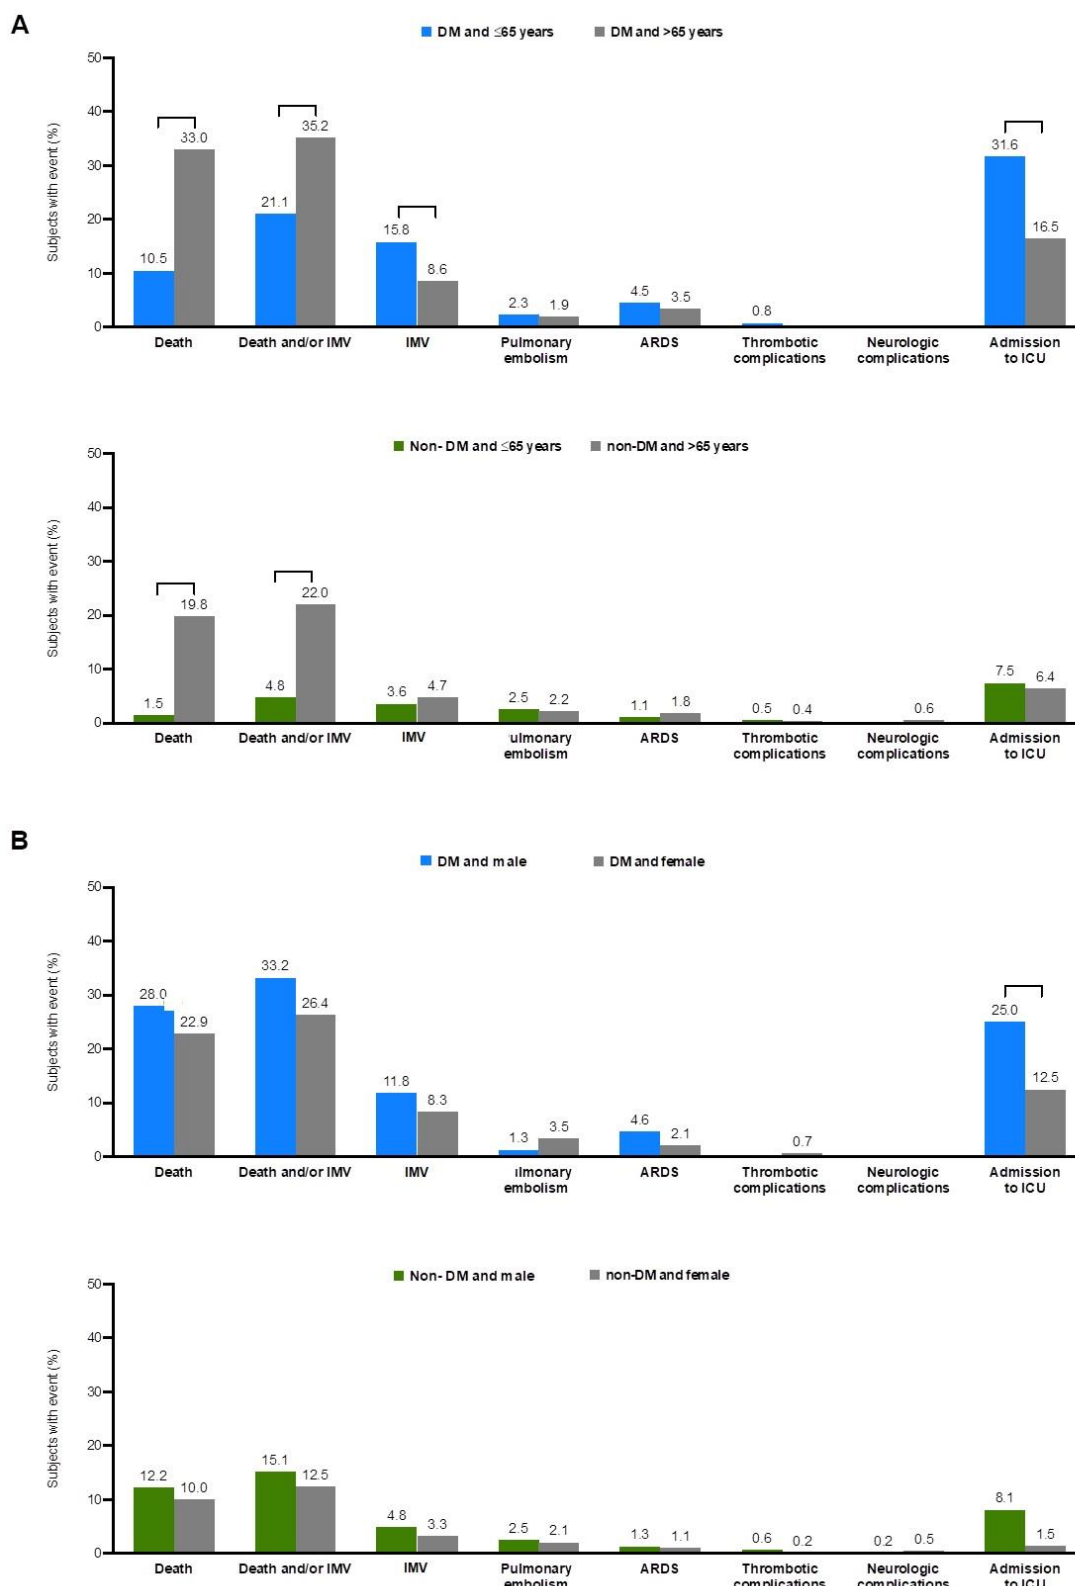

ARDS, acute respiratory distress syndrome; DM, diabetes mellitus; ICU, intensive care unit; IMV, invasive mechanical ventilation. \*\*\* p<0.001; \*\* p<0.01; \* p<0.05



1  
2  
3  
4  
5  
6  
7  
8  
9  
10  
11  
12  
13  
14  
15  
16  
17  
18  
19  
20  
21  
22  
23  
24  
25  
26  
27  
28  
29  
30  
31  
32  
33  
34  
35  
36  
37  
38  
39  
40  
41  
42  
43  
44  
45  
46

**Supplementary table 2.** Number of events in patients with pre-existing diabetes and stress hyperglycaemia/unknown diabetes

|                                              | Pre-existing diabetes<br>(DM codes and/or HbA1c≥6.5% and/or<br>antidiabetic treatment<br>N=302 | Stress hyperglycaemia/unknown<br>diabetes<br>glucose≥200 mg/dl or insulin use in<br>the first 24 hours of admission<br>N=146 |
|----------------------------------------------|------------------------------------------------------------------------------------------------|------------------------------------------------------------------------------------------------------------------------------|
| Death                                        | 69 (22.8%)                                                                                     | 49 (33.6%)                                                                                                                   |
| Death and or invasive mechanical ventilation | 79 (26.2%)                                                                                     | 60 (41.1%)                                                                                                                   |
| Invasive mechanical ventilation              | 22 (7.28%)                                                                                     | 26 (17.8%)                                                                                                                   |
| Pulmonary embolism                           | 5 (1.66%)                                                                                      | 4 (2.74%)                                                                                                                    |
| Acute respiratory distress syndrome (ARDS)   | 7 (2.32%)                                                                                      | 10 (6.85%)                                                                                                                   |
| Thrombotic complications                     | 1 (0.33%)                                                                                      | 0 (0.00%)                                                                                                                    |
| Neurologic complications                     | 0 (0.00%)                                                                                      | 0 (0.00%)                                                                                                                    |
| Admission to intensive care unit             | 23 (7.62%)                                                                                     | 71 (48.6%)                                                                                                                   |

**Supplementary Table 3.** Clinical characteristics at baseline as predictors of death vs death or invasive mechanical ventilation according to the model with all potential independent variables included

| Predictors                        | Death       |             |         | Death or invasive mechanical ventilation |             |         |
|-----------------------------------|-------------|-------------|---------|------------------------------------------|-------------|---------|
|                                   | Odds Ratios | 95% CI      | p-value | Odds Ratios                              | 95% CI      | p-value |
| Diabetes (yes)                    | 2.325 ***   | 1.719–3.144 | <0.001  | 2.107 ***                                | 1.608–2.761 | <0.001  |
| Sex (male)                        | 1.977 ***   | 1.463–2.670 | <0.001  | 1.663 ***                                | 1.276–2.167 | <0.001  |
| Age (years)                       | 1.102 ***   | 1.087–1.117 | <0.001  | 1.063 ***                                | 1.052–1.075 | <0.001  |
| Obesity (yes)                     | 1.297       | 0.694–2.424 | 0.414   | 1.978 **                                 | 1.198–3.267 | 0.008   |
| Hypertension (yes)                | 1.188       | 0.874–1.613 | 0.271   | 1.188                                    | 0.902–1.565 | 0.221   |
| Hyperlipidaemia (yes)             | 1.289       | 0.919–1.808 | 0.141   | 1.158                                    | 0.853–1.572 | 0.346   |
| Cardiovascular diseases (yes)     | 1.721       | 0.999–2.966 | 0.051   | 1.403                                    | 0.830–2.370 | 0.206   |
| Heart failure (yes)               | 0.964       | 0.504–1.842 | 0.911   | 1.082                                    | 0.578–2.023 | 0.806   |
| Chronic renal insufficiency (yes) | 2.135 **    | 1.246–3.659 | 0.006   | 2.096 **                                 | 1.255–3.498 | 0.005   |
| COPD (yes)                        | 1.721 *     | 1.066–2.779 | 0.026   | 2.310 ***                                | 1.498–.564  | <0.001  |
| Observations                      | 2069        |             |         | 2069                                     |             |         |
| R2 Tjur                           | 0.208       |             |         | 0.157                                    |             |         |
| Hosmer–Lemeshow test              | 0.26        |             |         | 0.94                                     |             |         |

p<0.05 \*\* p<0.01 \*\*\* p<0.001

1  
2  
3  
4  
5  
6  
7  
8  
9  
10  
11  
12  
13  
14  
15  
16  
17  
18  
19  
20  
21  
22  
23  
24  
25  
26  
27  
28  
29  
30  
31  
32  
33  
34  
35  
36  
37  
38  
39  
40  
41  
42  
43  
44  
45  
46

**Supplementary Table 4.** Mortality model evaluating diabetes and interactions with other clinical comorbid conditions regarding the outcome of death.

| Predictors                        | Death       |             |         |
|-----------------------------------|-------------|-------------|---------|
|                                   | Odds Ratios | 95% CI      | p-value |
| Diabetes * Obesity                | 0.720       | 0.214–2.425 | 0.596   |
| Diabetes * Hyperlipidaemia        | 0.766       | 0.407–1.442 | 0.408   |
| Diabetes * Heart failure          | 1.406       | 0.373–5.298 | 0.614   |
| Diabetes * Chronic kidney disease | 0.805       | 0.273–2.371 | 0.693   |
| Diabetes * COPD                   | 0.631       | 0.235–1.696 | 0.361   |

For peer review only

**Supplementary Table 5.** Clinical characteristics at baseline associated with in-hospital death stratified for diabetes status (model 3, namely the model with all demographic and clinical variables included).

| Predictors              | Without diabetes |             |         | Diabetes    |             |         |
|-------------------------|------------------|-------------|---------|-------------|-------------|---------|
|                         | Odds Ratios      | 95% CI      | p-value | Odds Ratios | 95% CI      | p-value |
| Sex (male)              | 2.107 ***        | 1.516–2.929 | <0.001  | 2.125 *     | 1.014–4.451 | 0.046   |
| Age                     | 1.096 ***        | 1.081–1.112 | <0.001  | 1.124 ***   | 1.081–1.170 | <0.001  |
| Obesity                 | 1.984            | 0.938–4.198 | 0.073   | 0.826       | 0.272–2.511 | 0.736   |
| Hypertension            | 1.333            | 0.947–1.876 | 0.099   | 0.823       | 0.400–1.697 | 0.598   |
| Hyperlipidaemia         | 1.173            | 0.780–1.765 | 0.443   | 1.729       | 0.899–3.326 | 0.101   |
| Cardiovascular diseases | 1.943 *          | 1.033–3.654 | 0.039   | 1.368       | 0.445–4.208 | 0.584   |
| Heart failure           | 0.926            | 0.442–1.944 | 0.840   | 1.330       | 0.323–5.484 | 0.693   |
| Chronic kidney disease  | 2.143 *          | 1.137–4.038 | 0.018   | 2.839 *     | 1.000–8.060 | 0.050   |
| COPD                    | 1.712            | 0.984–2.979 | 0.057   | 1.404       | 0.529–3.729 | 0.495   |
| Observations            | 1795             |             |         | 274         |             |         |
| R <sup>2</sup> Tjur     | 0.178            |             |         | 0.240       |             |         |

p<0.05 \*\* p<0.01 \*\*\* p<0.001

1  
2  
3  
4  
5  
6  
7  
8  
9  
10  
11  
12  
13  
14  
15  
16  
17  
18  
19  
20  
21  
22  
23  
24  
25  
26  
27  
28  
29  
30  
31  
32  
33  
34  
35  
36  
37  
38  
39  
40  
41  
42  
43  
44  
45  
46

**Supplementary Table 6.** Clinical characteristics at baseline associated to in-hospital death or mechanical ventilation stratified for diabetes status (model 3, namely the model with all demographic and clinical variables included).

| Predictors              | Without diabetes |             |         | Diabetes    |             |         |
|-------------------------|------------------|-------------|---------|-------------|-------------|---------|
|                         | Odds Ratios      | 95% CI      | p-value | Odds Ratios | 95% CI      | p-value |
| Sex (male)              | 1.710 ***        | 1.282–2.280 | <0.001  | 2.138 *     | 1.081–4.226 | 0.029   |
| Age                     | 1.061 ***        | 1.050–1.073 | <0.001  | 1.082 ***   | 1.047–1.118 | <0.001  |
| Obesity                 | 2.958 ***        | 1.651–5.298 | <0.001  | 1.090       | 0.420–2.827 | 0.860   |
| Hypertension            | 1.297            | 0.955–1.762 | 0.096   | 0.920       | 0.473–1.789 | 0.806   |
| Hyperlipidaemia         | 1.165            | 0.811–1.675 | 0.408   | 1.326       | 0.728–2.415 | 0.356   |
| Cardiovascular diseases | 1.525            | 0.827–2.814 | 0.177   | 1.217       | 0.426–3.477 | 0.714   |
| Heart failure           | 0.923            | 0.447–1.906 | 0.829   | 2.219       | 0.549–8.971 | 0.264   |
| Chronic kidney disease  | 1.993 *          | 1.084–3.662 | 0.026   | 3.140 *     | 1.163–8.474 | 0.024   |
| COPD                    | 2.298 **         | 1.396–3.781 | 0.001   | 1.976       | 0.800–4.885 | 0.140   |
| Observations            | 1795             |             |         | 274         |             |         |
| R2 Tjur                 | 0.129            |             |         | 0.190       |             |         |

p<0.05 \*\* p<0.01 \*\*\* p<0.001

**Supplementary Table 7.** Multivariate model of the association between predictors and the odds of death and death or invasive mechanical ventilation based on the nonlinear glucose curve.

| Predictors              | Death      |             |         | Death or Invasive mechanical ventilation |             |         |
|-------------------------|------------|-------------|---------|------------------------------------------|-------------|---------|
|                         | Odds Ratio | 95% CI      | p-value | Odds Ratio                               | 95% CI      | p-value |
| Sex (male)              | 1.911 ***  | 1.375–2.655 | <0.001  | 1.540 **                                 | 1.159–2.047 | 0.003   |
| Age                     | 1.108 ***  | 1.090–1.125 | <0.001  | 1.062 ***                                | 1.049–1.074 | <0.001  |
| Obesity                 | 1.079      | 0.527–2.206 | 0.836   | 1.814 *                                  | 1.057–3.112 | 0.031   |
| Hypertension            | 1.109      | 0.800–1.537 | 0.534   | 1.134                                    | 0.849–1.515 | 0.394   |
| Hyperlipidaemia         | 1.330      | 0.928–1.906 | 0.120   | 1.152                                    | 0.837–1.585 | 0.386   |
| Cardiovascular diseases | 1.686      | 0.958–2.967 | 0.070   | 1.356                                    | 0.792–2.325 | 0.267   |
| Heart failure           | 0.768      | 0.388–1.520 | 0.448   | 0.911                                    | 0.472–1.757 | 0.781   |
| Chronic kidney disease  | 2.251 **   | 1.268–3.996 | 0.006   | 2.151 **                                 | 1.250–3.701 | 0.006   |
| COPD                    | 1.666 *    | 1.006–2.760 | 0.047   | 2.253 ***                                | 1.436–3.536 | <0.001  |
| Observations            | 1877       |             |         | 1877                                     |             |         |
| R2                      | 0.241      |             |         | 0.188                                    |             |         |

p<0.05 \*\* p<0.01 \*\*\* p<0.001

# Covid Data Save Lives

---

HM Hospitales makes an anonymous dataset freely available to the international medical and scientific community with all the available clinical information on patients treated in our hospital centers for the SARS-CoV-2 virus

Compared to most of the existing **databases on COVID-19**, focused on demographic data, this clinical dataset collects the different interactions in the **COVID-19 treatment process, including detailed information on diagnoses, treatments, admissions, ICU admissions, diagnostic imaging tests, laboratory results, discharge or death, among many other records.**

With the opening of this dataset, we intend to take the first step and serve as an example for other institutions to be encouraged to share their information and thus, together, be able to offer the medical and scientific community clinical data with which to obtain predictive models of evolution, epidemiological models, information on the response to the various treatments applied, **knowledge of virus for the creation of a vaccine, and sociodemographic data on the impact on the population of the virus.**

## Dataset “Covid Data Save lives”

The information in this data set comes from the HM Hospitales EHR system. It contains the anonymized records of 2,310 patients, admitted with a diagnosis of COVID POSITIVE or COVID PENDING, since the beginning of the epidemic to date. The information is organized in tables according to their content, all of them linked by a unique admission identifier. This identifier is the de-anonymization key, explicitly created for this purpose, and has nothing to do with the actual identifier of each admission.

- The main table includes data on the admission and the patient (age and sex), data on the previous emergency if there has been one (2,226 records), data on their stay in the ICU if there has been one and records of the first and last set of emergency constants.
- The medication table shows all the medication administered to each patient during admission (more than 60,000 records), with the dates

1  
2  
3 corresponding to the first and last administration of each drug, identified  
4 by their brand name and classification in the ATC5/ATC7.

- 5 • In the table of vital signs, there are all the basic records of constants  
6 (54,000 records so far) collected during admission with their date and  
7 time of registration.
- 8 • The laboratory table contains the results of the determinations (398,884  
9 records) of all the requests made to each patient during admission and in  
10 the previous emergency, if any.
- 11 • And finally, the ICD10 coding tables show the records of diagnostic and  
12 procedural information coded according to the international ICD10  
13 classification in its latest distributed version (does not include COVID),  
14 for the patients referred, both for episodes of hospital admission (more  
15 than 1,600) and for the emergency (more than 1,900) prior to those  
16 episodes, if any.

17  
18  
19  
20  
21  
22  
23  
24 Web page: <https://www.hmhospitales.com/coronavirus/covid-data-save-lives/english-version>



**The RECORD statement – checklist of items, extended from the STROBE statement, that should be reported in observational studies using routinely collected health data.**

**Risk factors for severe outcomes in people with diabetes hospitalized for COVID-19: A cross-sectional “Covid Data Save Lives” database study**

Emilio Ortega, Rosa Corcoy, Mònica Gratacòs, Xavier Cos-Claramunt, Manel Mata-Cases, Ramon Puig-Treserra, Jordi Real, Bogdan Vlachou, Esmeralda Castelblanco, Pere Domingo, Kamlesh Khunti, Josep Franch-Nadal and Dídac Mauricio

|                           | Item No. | STROBE items                                                                                                                                                                               | Location in manuscript where items are reported | RECORD items                                                                                                                                                                                                                                                                                                                                                                                                                                | Location in manuscript where items are reported |
|---------------------------|----------|--------------------------------------------------------------------------------------------------------------------------------------------------------------------------------------------|-------------------------------------------------|---------------------------------------------------------------------------------------------------------------------------------------------------------------------------------------------------------------------------------------------------------------------------------------------------------------------------------------------------------------------------------------------------------------------------------------------|-------------------------------------------------|
| <b>Title and abstract</b> |          |                                                                                                                                                                                            |                                                 |                                                                                                                                                                                                                                                                                                                                                                                                                                             |                                                 |
|                           | 1        | (a) Indicate the study’s design with a commonly used term in the title or the abstract (b) Provide in the abstract an informative and balanced summary of what was done and what was found |                                                 | RECORD 1.1: The type of data used should be specified in the title or abstract. When possible, the name of the databases used should be included.<br><br>RECORD 1.2: If applicable, the geographic region and timeframe within which the study took place should be reported in the title or abstract.<br><br>RECORD 1.3: If linkage between databases was conducted for the study, this should be clearly stated in the title or abstract. | <b>Abstract</b>                                 |
| <b>Introduction</b>       |          |                                                                                                                                                                                            |                                                 |                                                                                                                                                                                                                                                                                                                                                                                                                                             |                                                 |
| Background rationale      | 2        | Explain the scientific background and rationale for the investigation being reported                                                                                                       |                                                 |                                                                                                                                                                                                                                                                                                                                                                                                                                             | <b>Page 4-5<br/>Lines: 2-24 and 1-22</b>        |
| Objectives                | 3        | State specific objectives, including any prespecified hypotheses                                                                                                                           |                                                 |                                                                                                                                                                                                                                                                                                                                                                                                                                             | <b>Page 6<br/>Lines: 4</b>                      |
| <b>Methods</b>            |          |                                                                                                                                                                                            |                                                 |                                                                                                                                                                                                                                                                                                                                                                                                                                             |                                                 |

|                                                                                                                                                                   |              |   |                                                                                                                                                                                                                                                                                                                                                                                                                                                                                                                                                                                                                                                                                                                              |  |                                                                                                                                                                                                                                                                                                                                                                                                                                                                                                                                                                                                                                                                                                      |                                              |
|-------------------------------------------------------------------------------------------------------------------------------------------------------------------|--------------|---|------------------------------------------------------------------------------------------------------------------------------------------------------------------------------------------------------------------------------------------------------------------------------------------------------------------------------------------------------------------------------------------------------------------------------------------------------------------------------------------------------------------------------------------------------------------------------------------------------------------------------------------------------------------------------------------------------------------------------|--|------------------------------------------------------------------------------------------------------------------------------------------------------------------------------------------------------------------------------------------------------------------------------------------------------------------------------------------------------------------------------------------------------------------------------------------------------------------------------------------------------------------------------------------------------------------------------------------------------------------------------------------------------------------------------------------------------|----------------------------------------------|
| 1<br>2                                                                                                                                                            | Study Design | 4 | Present key elements of study design early in the paper                                                                                                                                                                                                                                                                                                                                                                                                                                                                                                                                                                                                                                                                      |  |                                                                                                                                                                                                                                                                                                                                                                                                                                                                                                                                                                                                                                                                                                      | Page 7<br>Lines: 3-4                         |
| 3<br>4<br>5<br>6                                                                                                                                                  | Setting      | 5 | Describe the setting, locations, and relevant dates, including periods of recruitment, exposure, follow-up, and data collection                                                                                                                                                                                                                                                                                                                                                                                                                                                                                                                                                                                              |  |                                                                                                                                                                                                                                                                                                                                                                                                                                                                                                                                                                                                                                                                                                      | Page 7<br>Lines:4-11                         |
| 7<br>8<br>9<br>10<br>11<br>12<br>13<br>14<br>15<br>16<br>17<br>18<br>19<br>20<br>21<br>22<br>23<br>24<br>25<br>26<br>27<br>28<br>29<br>30<br>31<br>32<br>33<br>34 | Participants | 6 | <p>(a) <i>Cohort study</i> - Give the eligibility criteria, and the sources and methods of selection of participants. Describe methods of follow-up</p> <p><i>Case-control study</i> - Give the eligibility criteria, and the sources and methods of case ascertainment and control selection. Give the rationale for the choice of cases and controls</p> <p><i>Cross-sectional study</i> - Give the eligibility criteria, and the sources and methods of selection of participants</p> <p>(b) <i>Cohort study</i> - For matched studies, give matching criteria and number of exposed and unexposed</p> <p><i>Case-control study</i> - For matched studies, give matching criteria and the number of controls per case</p> |  | <p>RECORD 6.1: The methods of study population selection (such as codes or algorithms used to identify subjects) should be listed in detail. If this is not possible, an explanation should be provided.</p> <p>RECORD 6.2: Any validation studies of the codes or algorithms used to select the population should be referenced. If validation was conducted for this study and not published elsewhere, detailed methods and results should be provided.</p> <p>RECORD 6.3: If the study involved linkage of databases, consider use of a flow diagram or other graphical display to demonstrate the data linkage process, including the number of individuals with linked data at each stage.</p> | Page 7<br>Lines:19-24<br>Page 8<br>Lines:1-4 |
| 35<br>36<br>37<br>38<br>39<br>40<br>41<br>42<br>43<br>44<br>45<br>46<br>47                                                                                        | Variables    | 7 | Clearly define all outcomes, exposures, predictors, potential confounders, and effect modifiers. Give diagnostic criteria, if applicable.                                                                                                                                                                                                                                                                                                                                                                                                                                                                                                                                                                                    |  | RECORD 7.1: A complete list of codes and algorithms used to classify exposures, outcomes, confounders, and effect modifiers should be provided. If these cannot be reported, an explanation should be provided.                                                                                                                                                                                                                                                                                                                                                                                                                                                                                      | Page 8<br>Lines:5-14                         |

|                                                                                                                                        |                              |    |                                                                                                                                                                                                                                                                                                                                                                                                                                                                                                                                                                                                    |  |  |                                                                            |
|----------------------------------------------------------------------------------------------------------------------------------------|------------------------------|----|----------------------------------------------------------------------------------------------------------------------------------------------------------------------------------------------------------------------------------------------------------------------------------------------------------------------------------------------------------------------------------------------------------------------------------------------------------------------------------------------------------------------------------------------------------------------------------------------------|--|--|----------------------------------------------------------------------------|
| 1<br>2<br>3<br>4<br>5<br>6<br>7                                                                                                        | Data sources/<br>measurement | 8  | For each variable of interest,<br>give sources of data and details<br>of methods of assessment<br>(measurement).<br>Describe comparability of<br>assessment methods if there is<br>more than one group                                                                                                                                                                                                                                                                                                                                                                                             |  |  | <b>Page 7</b><br><b>Lines:12-16</b>                                        |
| 8<br>9                                                                                                                                 | Bias                         | 9  | Describe any efforts to address<br>potential sources of bias                                                                                                                                                                                                                                                                                                                                                                                                                                                                                                                                       |  |  | <b>Page 9</b><br><b>Lines:1-7</b>                                          |
| 10<br>11<br>12                                                                                                                         | Study size                   | 10 | Explain how the study size was<br>arrived at                                                                                                                                                                                                                                                                                                                                                                                                                                                                                                                                                       |  |  | NA                                                                         |
| 13<br>14<br>15<br>16<br>17<br>18                                                                                                       | Quantitative<br>variables    | 11 | Explain how quantitative<br>variables were handled in the<br>analyses. If applicable, describe<br>which groupings were chosen,<br>and why                                                                                                                                                                                                                                                                                                                                                                                                                                                          |  |  | <b>Page 8</b><br><b>Lines:21-24</b>                                        |
| 19<br>20<br>21<br>22<br>23<br>24<br>25<br>26<br>27<br>28<br>29<br>30<br>31<br>32<br>33<br>34<br>35<br>36<br>37<br>38<br>39<br>40<br>41 | Statistical<br>methods       | 12 | (a) Describe all statistical<br>methods, including those used to<br>control for confounding<br>(b) Describe any methods used<br>to examine subgroups and<br>interactions<br>(c) Explain how missing data<br>were addressed<br>(d) <i>Cohort study</i> - If applicable,<br>explain how loss to follow-up<br>was addressed<br><i>Case-control study</i> - If<br>applicable, explain how<br>matching of cases and controls<br>was addressed<br><i>Cross-sectional study</i> - If<br>applicable, describe analytical<br>methods taking account of<br>sampling strategy<br>(e) Describe any sensitivity |  |  | <b>Page 8</b><br><b>Lines:21-24</b><br><b>Page 9</b><br><b>Lines: 1-12</b> |

|                                                                            |                                  |          |                                                                                                                                                                                                                                                                                                                        |                                                                                                                                                                                                                                                                                                                    |                       |
|----------------------------------------------------------------------------|----------------------------------|----------|------------------------------------------------------------------------------------------------------------------------------------------------------------------------------------------------------------------------------------------------------------------------------------------------------------------------|--------------------------------------------------------------------------------------------------------------------------------------------------------------------------------------------------------------------------------------------------------------------------------------------------------------------|-----------------------|
|                                                                            |                                  | analyses |                                                                                                                                                                                                                                                                                                                        |                                                                                                                                                                                                                                                                                                                    |                       |
| 1<br>2<br>3<br>4<br>5<br>6<br>7<br>8<br>9<br>10<br>11                      | Data access and cleaning methods | ..       |                                                                                                                                                                                                                                                                                                                        | RECORD 12.1: Authors should describe the extent to which the investigators had access to the database population used to create the study population.<br><br>RECORD 12.2: Authors should provide information on the data cleaning methods used in the study.                                                       | Page 7<br>Lines:12-18 |
| 12<br>13<br>14<br>15<br>16<br>17<br>18<br>19                               | Linkage                          | ..       |                                                                                                                                                                                                                                                                                                                        | RECORD 12.3: State whether the study included person-level, institutional-level, or other data linkage across two or more databases. The methods of linkage and methods of linkage quality evaluation should be provided.                                                                                          | NA                    |
| 20                                                                         | <b>Results</b>                   |          |                                                                                                                                                                                                                                                                                                                        |                                                                                                                                                                                                                                                                                                                    |                       |
| 21<br>22<br>23<br>24<br>25<br>26<br>27<br>28<br>29<br>30<br>31<br>32<br>33 | Participants                     | 13       | (a) Report the numbers of individuals at each stage of the study ( <i>e.g.</i> , numbers potentially eligible, examined for eligibility, confirmed eligible, included in the study, completing follow-up, and analysed)<br>(b) Give reasons for non-participation at each stage.<br>(c) Consider use of a flow diagram | RECORD 13.1: Describe in detail the selection of the persons included in the study ( <i>i.e.</i> , study population selection) including filtering based on data quality, data availability and linkage. The selection of included persons can be described in the text and/or by means of the study flow diagram. | Page 9<br>Lines:18-24 |
| 34<br>35<br>36<br>37<br>38<br>39<br>40<br>41                               | Descriptive data                 | 14       | (a) Give characteristics of study participants ( <i>e.g.</i> , demographic, clinical, social) and information on exposures and potential confounders<br>(b) Indicate the number of participants with missing data                                                                                                      |                                                                                                                                                                                                                                                                                                                    | Page 10<br>Lines:1-11 |

|                   |    |                                                                                                                                                                                                                                                                                                                                                                                                                 |  |                          |                                                                          |
|-------------------|----|-----------------------------------------------------------------------------------------------------------------------------------------------------------------------------------------------------------------------------------------------------------------------------------------------------------------------------------------------------------------------------------------------------------------|--|--------------------------|--------------------------------------------------------------------------|
|                   |    | for each variable of interest<br>(c) <i>Cohort study</i> - summarise follow-up time (e.g., average and total amount)                                                                                                                                                                                                                                                                                            |  |                          |                                                                          |
| Outcome data      | 15 | <i>Cohort study</i> - Report numbers of outcome events or summary measures over time<br><i>Case-control study</i> - Report numbers in each exposure category, or summary measures of exposure<br><i>Cross-sectional study</i> - Report numbers of outcome events or summary measures                                                                                                                            |  |                          | Page 10<br>Lines: 12-19                                                  |
| Main results      | 16 | (a) Give unadjusted estimates and, if applicable, confounder-adjusted estimates and their precision (e.g., 95% confidence interval). Make clear which confounders were adjusted for and why they were included<br>(b) Report category boundaries when continuous variables were categorized<br>(c) If relevant, consider translating estimates of relative risk into absolute risk for a meaningful time period |  |                          | Page 10<br>Lines:20-25<br>Page 11<br>Lines: 1-23<br>Page 12<br>Lines:1-4 |
| Other analyses    | 17 | Report other analyses done— e.g., analyses of subgroups and interactions, and sensitivity analyses                                                                                                                                                                                                                                                                                                              |  |                          | Page 12<br>Lines5-17                                                     |
| <b>Discussion</b> |    |                                                                                                                                                                                                                                                                                                                                                                                                                 |  |                          |                                                                          |
| Key results       | 18 | Summarise key results with reference to study objectives                                                                                                                                                                                                                                                                                                                                                        |  |                          | Page 12<br>Lines: 19-24                                                  |
| Limitations       | 19 | Discuss limitations of the study,                                                                                                                                                                                                                                                                                                                                                                               |  | RECORD 19.1: Discuss the | Page 14                                                                  |

|                                                           |    |                                                                                                                                                                            |  |                                                                                                                                                                                                                                                                                 |                                                                             |
|-----------------------------------------------------------|----|----------------------------------------------------------------------------------------------------------------------------------------------------------------------------|--|---------------------------------------------------------------------------------------------------------------------------------------------------------------------------------------------------------------------------------------------------------------------------------|-----------------------------------------------------------------------------|
|                                                           |    | taking into account sources of potential bias or imprecision. Discuss both direction and magnitude of any potential bias                                                   |  | implications of using data that were not created or collected to answer the specific research question(s). Include discussion of misclassification bias, unmeasured confounding, missing data, and changing eligibility over time, as they pertain to the study being reported. | <b>Lines:22-24</b><br><b>Page 15</b><br><b>Lines:1-22</b>                   |
| Interpretation                                            | 20 | Give a cautious overall interpretation of results considering objectives, limitations, multiplicity of analyses, results from similar studies, and other relevant evidence |  |                                                                                                                                                                                                                                                                                 | <b>Page 13</b><br><b>Lines:1-22</b><br><b>Page 14</b><br><b>Lines: 1-20</b> |
| Generalisability                                          | 21 | Discuss the generalisability (external validity) of the study results                                                                                                      |  |                                                                                                                                                                                                                                                                                 | <b>Page 16</b><br><b>Lines:1-10</b>                                         |
| <b>Other Information</b>                                  |    |                                                                                                                                                                            |  |                                                                                                                                                                                                                                                                                 |                                                                             |
| Funding                                                   | 22 | Give the source of funding and the role of the funders for the present study and, if applicable, for the original study on which the present article is based              |  |                                                                                                                                                                                                                                                                                 | <b>Page 17</b><br><b>Lines: 11</b>                                          |
| Accessibility of protocol, raw data, and programming code |    | ..                                                                                                                                                                         |  | RECORD 22.1: Authors should provide information on how to access any supplemental information such as the study protocol, raw data, or programming code.                                                                                                                        | <b>Page 17</b><br><b>Lines:12-13</b>                                        |

\*Reference: Benchimol EI, Smeeth L, Guttman A, Harron K, Moher D, Petersen I, Sørensen HT, von Elm E, Langan SM, the RECORD Working Committee. The REporting of studies Conducted using Observational Routinely-collected health Data (RECORD) Statement. *PLoS Medicine* 2015; in press.

\*Checklist is protected under Creative Commons Attribution ([CC BY](https://creativecommons.org/licenses/by/4.0/)) license.

# BMJ Open

## Risk factors for severe outcomes in people with diabetes hospitalized for COVID-19: A cross-sectional "Covid Data Save Lives" database study

|                                 |                                                                                                                                                                                                                                                                                                                                                                                                                                                                                                                                                                                                                                                                                                                                                                                                                                                                                                                                                                                                                                                                                                                                                                                                                                                                                                                                                     |
|---------------------------------|-----------------------------------------------------------------------------------------------------------------------------------------------------------------------------------------------------------------------------------------------------------------------------------------------------------------------------------------------------------------------------------------------------------------------------------------------------------------------------------------------------------------------------------------------------------------------------------------------------------------------------------------------------------------------------------------------------------------------------------------------------------------------------------------------------------------------------------------------------------------------------------------------------------------------------------------------------------------------------------------------------------------------------------------------------------------------------------------------------------------------------------------------------------------------------------------------------------------------------------------------------------------------------------------------------------------------------------------------------|
| Journal:                        | <i>BMJ Open</i>                                                                                                                                                                                                                                                                                                                                                                                                                                                                                                                                                                                                                                                                                                                                                                                                                                                                                                                                                                                                                                                                                                                                                                                                                                                                                                                                     |
| Manuscript ID                   | bmjopen-2021-051237.R2                                                                                                                                                                                                                                                                                                                                                                                                                                                                                                                                                                                                                                                                                                                                                                                                                                                                                                                                                                                                                                                                                                                                                                                                                                                                                                                              |
| Article Type:                   | Original research                                                                                                                                                                                                                                                                                                                                                                                                                                                                                                                                                                                                                                                                                                                                                                                                                                                                                                                                                                                                                                                                                                                                                                                                                                                                                                                                   |
| Date Submitted by the Author:   | 29-Jun-2021                                                                                                                                                                                                                                                                                                                                                                                                                                                                                                                                                                                                                                                                                                                                                                                                                                                                                                                                                                                                                                                                                                                                                                                                                                                                                                                                         |
| Complete List of Authors:       | <p>Ortega, Emilio; Hospital Clinic de Barcelona<br/> Corcoy, Rosa; Hospital de la Santa Creu i Sant Pau,<br/> Gratacòs , Mònica; IDIAP Jordi Gol<br/> Cos Claramunt, Francesc Xavier; IDIAP Jordi Gol<br/> Mata-Cases, Manel; IDIAP Jordi Gol, DAP-Cat Group, Unitat de Suport a la Recerca Barcelona; Institut Català De La Salut, La Mina Primary Health Care Centre<br/> Puig- Treserra, Ramon ; IDIAP Jordi Gol<br/> Real, Jordi; Institut Universitari d'Investigaci Primària Jordi Gol (IDIAP Jordi Gol), DAP-Cat group. Unitat de Suport a la Recerca Barcelona Ciutat<br/> Vlacho, Bogdan; IDIAP Jordi Gol<br/> Castelblanco, Esmeralda; Hospital de la Santa Creu i Sant Pau, Endocrinology<br/> Domingo, Pere; Hospital de la Santa Creu i Sant Pau, Infectious Diseases<br/> Khunti, Kamlesh; University of Leicester, Diabetes Research Centre<br/> Franch-Nadal, Josep; DAP-Cat group. Unitat de Suport a la Recerca Barcelona Ciutat, Institut Universitari d'Investigació en Atenció Primària Jordi Gol (IDIAP Jordi Gol); Primary Health Care Center Raval Sud, Gerència d'Àmbit d'Atenció Primària Barcelona Ciutat, Institut Català de la Salut<br/> Mauricio, Didac ; Hospital de la Santa Creu i Sant Pau, Endocrinology &amp; Nutrition; Fundacio Institut de Recerca Hospital de la Santa Creu i Sant Pau, Didac Mauricio</p> |
| <b>Primary Subject Heading</b>: | Diabetes and endocrinology                                                                                                                                                                                                                                                                                                                                                                                                                                                                                                                                                                                                                                                                                                                                                                                                                                                                                                                                                                                                                                                                                                                                                                                                                                                                                                                          |
| Secondary Subject Heading:      | Epidemiology, Infectious diseases                                                                                                                                                                                                                                                                                                                                                                                                                                                                                                                                                                                                                                                                                                                                                                                                                                                                                                                                                                                                                                                                                                                                                                                                                                                                                                                   |
| Keywords:                       | COVID-19, General diabetes < DIABETES & ENDOCRINOLOGY, Epidemiology < INFECTIOUS DISEASES                                                                                                                                                                                                                                                                                                                                                                                                                                                                                                                                                                                                                                                                                                                                                                                                                                                                                                                                                                                                                                                                                                                                                                                                                                                           |
|                                 |                                                                                                                                                                                                                                                                                                                                                                                                                                                                                                                                                                                                                                                                                                                                                                                                                                                                                                                                                                                                                                                                                                                                                                                                                                                                                                                                                     |

SCHOLARONE™  
Manuscripts

1  
2  
3  
4  
5  
6  
7  
8  
9  
10  
11  
12  
13  
14  
15  
16  
17  
18  
19  
20  
21  
22  
23  
24  
25  
26  
27  
28  
29  
30  
31  
32  
33  
34  
35  
36  
37  
38  
39  
40  
41  
42  
43  
44  
45  
46  
47  
48  
49  
50  
51  
52  
53  
54  
55  
56  
57  
58  
59  
60





I, the Submitting Author has the right to grant and does grant on behalf of all authors of the Work (as defined in the below author licence), an exclusive licence and/or a non-exclusive licence for contributions from authors who are: i) UK Crown employees; ii) where BMJ has agreed a CC-BY licence shall apply, and/or iii) in accordance with the terms applicable for US Federal Government officers or employees acting as part of their official duties; on a worldwide, perpetual, irrevocable, royalty-free basis to BMJ Publishing Group Ltd ("BMJ") its licensees and where the relevant Journal is co-owned by BMJ to the co-owners of the Journal, to publish the Work in this journal and any other BMJ products and to exploit all rights, as set out in our [licence](#).

The Submitting Author accepts and understands that any supply made under these terms is made by BMJ to the Submitting Author unless you are acting as an employee on behalf of your employer or a postgraduate student of an affiliated institution which is paying any applicable article publishing charge ("APC") for Open Access articles. Where the Submitting Author wishes to make the Work available on an Open Access basis (and intends to pay the relevant APC), the terms of reuse of such Open Access shall be governed by a Creative Commons licence – details of these licences and which [Creative Commons](#) licence will apply to this Work are set out in our licence referred to above.

Other than as permitted in any relevant BMJ Author's Self Archiving Policies, I confirm this Work has not been accepted for publication elsewhere, is not being considered for publication elsewhere and does not duplicate material already published. I confirm all authors consent to publication of this Work and authorise the granting of this licence.

# Risk factors for severe outcomes in people with diabetes hospitalized for COVID-19: A cross-sectional “Covid Data Save Lives” database study

Emilio Ortega <sup>1,2,3</sup>, Rosa Corcoy <sup>4,5,6</sup>, Mònica Gratacòs<sup>1</sup>, Xavier Cos-Claramunt <sup>1,7</sup>, Manel Mata-Cases <sup>1,8,10</sup>, Ramon Puig-Treserra<sup>1</sup>, Jordi Real <sup>1</sup>, Bogdan Vlacho <sup>1</sup>, Esmeralda Castelblanco <sup>1,8</sup>, Pere Domingo <sup>9</sup>, Kamlesh Khunti <sup>11</sup>, Josep Franch-Nadal <sup>1,8,12\*</sup> and Dídac Mauricio <sup>1,4,8,13\*</sup>

<sup>1</sup> DAP-Cat group, Unitat de Suport a la Recerca Barcelona, Fundació Institut Universitari per a la recerca a l'Atenció Primària de Salut Jordi Gol i Gurina (IDIAPJGol), Barcelona, Spain

<sup>2</sup> CIBER of physiopathology of Obesity and Nutrition (CIBEROBN), Instituto de Salud Carlos III (ISCIII), Spain

<sup>3</sup> Department of Endocrinology and Nutrition, Institut d'Investigacions Biomèdiques August Pi i Suñer, Hospital Clinic, Barcelona, Spain

<sup>4</sup> Department of Endocrinology and Nutrition, Hospital Universitari de la Santa Creu i Sant Pau;

<sup>5</sup> Department of Medicine, Universitat Autònoma de Barcelona, Barcelona, Spain

<sup>6</sup> CIBER of Bioengineering, Biomaterials and Nanomedicine (CIBER-BBN), Instituto de Salud Carlos III (ISCIII), Spain

<sup>7</sup> Innovation office at Institut Català de la Salut, Barcelona, Spain

<sup>8</sup> CIBER of Diabetes and Associated Metabolic Diseases (CIBERDEM), Instituto de Salud Carlos III (ISCIII), Spain

<sup>9</sup> Infectious Diseases, Hospital Universitari de la Santa Creu i Sant Pau, Institut de Recerca Hospital Universitari de la Santa Creu i Sant Pau, Spain

<sup>10</sup> Primary Health Care Center La Mina, Gerència d'Àmbit d'Atenció Primària Barcelona Ciutat, Institut Català de la Salut, Sant Adrià de Besòs, Spain

<sup>11</sup> Diabetes Research Centre, University of Leicester, Leicester, UK

<sup>12</sup> Primary Health Care Center Raval Sud, Gerència d'Atenció Primària, Institut Català de la Salut, Barcelona, Spain

<sup>13</sup> Departament de Medicina, University of Vic - Central University of Catalonia, Vic, Barcelona, Spain.

\*Corresponding authors

Dr Dídac Mauricio,

Hospital de la Santa Creu i Sant Pau,

Sant Quintí, 89

08041 Barcelona, Spain

Telephone No.: +34 935565661; Fax No.: +34 9355602

Email: [didacmauricio@gmail.com](mailto:didacmauricio@gmail.com)

Dr Josep Franch-Nadal,

Centre d'Atenció Primària Raval Sud,

Av. Drassanes, 17-21,

08001 Barcelona, Spain

Telephone No.: +34 933294495; Fax No.: +34 9344277 63

Email: [josep.franch@gmail.com](mailto:josep.franch@gmail.com)

Word count: abstract 291; main text 3667

Tables: 1

Figures: 6

References: 46

Appendix: Tables 7; Figures 1;

1  
2  
3 **Abstract:**  
4  
5

6 **Aim:** This study's objective was to assess the risk of severe in-hospital complications of patients  
7  
8 admitted for coronavirus disease (COVID-19) and diabetes mellitus (DM).  
9

10  
11  
12 **Design:** This was a cross-sectional study  
13  
14

15 **Settings:** We used pseudonymised medical record data provided by six general hospitals from the  
16  
17 HM Hospitales group in Spain.  
18  
19

20  
21 **Outcome measures:** Multiple logistic regression analyses were used to identify variables  
22  
23 associated with mortality and the composite of mortality or invasive mechanical ventilation (IMV)  
24  
25 in the overall population, and stratified for the presence or absence of DM. Spline analysis was  
26  
27 conducted on the entire population to investigate the relationship between glucose levels at  
28  
29 admission and outcomes.  
30  
31

32  
33 **Results:** Overall, 1,621 individuals without DM and 448 with DM were identified in the database.  
34  
35 DM patients were on average 5.1 years older than those without. The overall in-hospital mortality  
36  
37 was 18.6% (N=301), and was higher among patients with DM than without (26.3% *vs.* 11.3%;  
38  
39  $p<0.001$ ). DM was independently associated with death, and death or IMV (OR=2.33, 95% CI: 1.7–  
40  
41 3.1 and OR=2.11, 95% CI: 1.6– 2.8, respectively;  $p<0.001$ ). In DM subjects, the only variables  
42  
43 independently associated with both outcomes were age >65 years, male sex, and pre-existing  
44  
45 chronic kidney disease (CKD). We observed a non-linear relationship between blood glucose  
46  
47 levels at admission and risk of in-hospital mortality and death or IMV. The highest probability for  
48  
49 each outcome (around 50%) was at random glucose of around 550 mg/dL (30.6 mmol/L), the risks  
50  
51 flattened above this value.  
52  
53  
54  
55

56 **Conclusion:** The results confirm the high burden associated with DM in patients hospitalized with  
57  
58 COVID-19 infection, particularly among males, the elderly, and those with impaired kidney  
59  
60

1  
2  
3 1 function. Moreover, hyperglycaemia on admission was strongly associated with poor outcomes,  
4  
5 2 suggesting that personalised optimisation could help to improve outcome during the hospital  
6  
7 3 stay.  
8  
9

10  
11 4 **Keywords:** COVID-19, Diabetes, Hyperglycaemia, In-hospital mortality, Mechanical ventilation  
12  
13 5

14  
15 6 **Strengths and limitations of this study**  
16  
17

- 18  
19 7 • A major strength of our study is the thorough methodological approach to analyse the risk  
20  
21 8 of in-hospital COVID-19-related complications based on the presence of DM or overt  
22  
23 9 hyperglycaemia.  
24  
25  
26 10 • We were limited by not having access to the patients' medical history prior to admission,  
27  
28 11 and the low number of registers for some important DM variables (such as Hb1Ac), and the  
29  
30 12 lack of data on weight or BMI (only the presence of obesity).  
31  
32  
33  
34 13 • The selection of DM subjects was made based on a proxy algorithm (including DM  
35  
36 14 diagnosis during the hospital stay, antidiabetic treatment, and HbA1c and blood glucose  
37  
38 15 levels at admission.  
39  
40  
41  
42 16 • We used random blood glucose on admission for spline analyses, thus preventing the  
43  
44 17 distinction between stress-related hyperglycaemia and uncontrolled pre-existing DM.  
45  
46  
47 18  
48  
49  
50  
51  
52  
53  
54  
55  
56  
57  
58  
59  
60

## 1. Introduction

On January 30, 2020, the World Health Organization (WHO) declared the outbreak of the novel SARS-CoV-2 coronavirus pandemic, a public health emergency of international importance. A few days later, the respiratory disease caused by SARS-CoV-2 was officially named COVID-19 (Corona Virus Infectious Disease 2019) [1, 2]. The first person diagnosed as positive in Spain was confirmed on January 31, 2020, on the island of La Gomera [3]. The median age of hospitalized patients infected with SARS-CoV-2 is 46.2 years, men comprise about 60% of patients, and the average incubation period is 5.7 days [4]. As of February 8, 2021, approximately 3 million people have been infected with SARS-CoV-2 in Spain since the start of the COVID-19 pandemic, and 62,295 persons have died.

Several meta-analyses have reported that the most severe and fatal cases of COVID-19 occur among the elderly and in patients with underlying comorbidities [5-7]. Indeed, those with two or more concomitant diseases have a significantly higher risk of admission to an intensive care unit (ICU), invasive ventilation, or death compared with those with a single concomitant disease, or without comorbidities [8]. The most prevalent comorbidities associated with increased COVID-19-related morbidity and mortality are the presence of diabetes mellitus (DM), cardiovascular diseases (CVDs), chronic lung disease, chronic kidney disease (CKD), hypertension, cancer, and obesity [5-7]. In addition, the AB0 blood type may play a role in the susceptibility and severity of COVID-19 infection, which could be of importance in patients with underlying high-risk conditions [8]. For instance, it has been reported that non-0 blood group hypertensive patients have significantly higher values of pro-thrombotic indexes and increased rates of cardiac injury and deaths compared with 0 patients [9].

SARS-CoV-2 utilizes angiotensin-converting enzyme 2 (ACE-2) as a cellular entry receptor, and the spike protein of the virus needs to be cleaved by cellular proteases (specifically TMPRSS2) to fuse

1 with the cellular membrane [10]. Although it was initially assumed that ACE inhibitors and  
2 angiotensin receptor blockers to treat hypertension or cardiovascular conditions might exacerbate  
3 COVID-19 infection and lead to worse outcomes, the most recent available meta-analysis did not  
4 confirm this higher risk [11]. Finally, it has been suggested that modulating TMPRSS2 expression  
5 through specific antibodies or non-coding-RNAs could prevent virus entry into host cells [11, 12],  
6 but these potential therapeutic options are still under investigation.

7 Previous studies have reported that people with DM are prone to new infections and recurrence,  
8 particularly influenza and pneumonia, due to impaired defences and disease complications [13-16].  
9 Although the estimated prevalence of DM in COVID-19 infected patients varies greatly by  
10 geographical region, it is considered similar to the DM prevalence in the general population, thus  
11 not representing a risk factor for infection [17]. However, the prevalence of diabetes among COVID-  
12 19 hospitalized subjects is higher than the overall diabetes prevalence [17, 18]. A study conducted in  
13 England found that a third of in-hospital deaths occurred in people with type 2 DM and that these  
14 patients had greater odds of COVID-19-related in-hospital death than those without DM [19]. This  
15 observation has been confirmed in a meta-analysis showing that DM is associated with a 2-fold  
16 higher risk of dying from COVID-19 [20], and a second study reporting that patients with pre-  
17 existing DM have a 3-fold greater risk of in-hospital mortality [21].

18 Early reports showed that about half of patients with severe COVID-19 presented acute  
19 hyperglycaemia, with no more than 10% of them having a prior diagnosis of DM [22, 23]. Following  
20 these observations, two meta-analyses concluded that hyperglycaemia at hospital admission is  
21 associated with severe complications and mortality, regardless of diabetes status [24,25]. Moreover,  
22 hyperglycaemia also has a negative impact on the therapeutic response to tocilizumab in patients  
23 with COVID-19-related systemic inflammation [26].

1  
2  
3 1 In Spain, DM is a highly prevalent disease in people over 18 years of age (13.8% of the population)  
4  
5 2 [27]. Given the high prevalence of DM and the additional challenging scenario that COVID-19  
6  
7 3 poses to health care professionals in this particular population, it is crucial to accumulate and share  
8  
9 4 information and data from different countries and regions [28]. Following this notion, the main  
10  
11 5 objective of this study was to assess the risk of in-hospital COVID-19-related complications based  
12  
13 6 on the presence of DM or overt hyperglycaemia at admission in Spain.  
14  
15  
16  
17 7  
18  
19  
20  
21  
22  
23  
24  
25  
26  
27  
28  
29  
30  
31  
32  
33  
34  
35  
36  
37  
38  
39  
40  
41  
42  
43  
44  
45  
46  
47  
48  
49  
50  
51  
52  
53  
54  
55  
56  
57  
58  
59  
60

For peer review only

## 2. Methods

### 2.1 Study design and settings

This was a cross-sectional study in hospitalized individuals infected with SARS-CoV-2, stratified by presence or absence of DM. Data were obtained from pseudonymized electronic health records provided by six general hospitals from the HM Hospitales group (Spain). The database included information related during the hospital stay (diagnosis and procedures codes, prescribed medications, vital signs, and laboratory parameters), from 2,310 subjects during the first COVID-19 wave with hospital admission between January 27 and April 24, 2020 (study start and end date, respectively). Subjects were followed from admission to hospital discharge or death. Detailed information related to the database is presented in the Supplementary material (**Database description**). The REporting of studies Conducted using Observational Routinely-collected Data (RECORD) Checklist is presented as Supplementary material.

The study data were collected by medical professionals of the HM Hospitales group (Spain) during the first wave of the COVID-19 pandemic. In order to promote COVID-19 related research, the HM Hospitales group pseudonymized the medical history of SARS-CoV-2 infected patients and created a project titled: "Covid Data Save Lives". Before access was granted, a formal petition, specific study protocol, and ethics committee approval were obtained.

### 2.2 Inclusion and Exclusion Criteria

The study enrolled people over 18 years of age with SARS-CoV-2 infection (COVID positive) microbiologically proven by reverse transcription polymerase chain reaction (RT-PCR). Those with DM were identified in the database if they: 1) had any ICD-10 (International Statistical Classification of Diseases) diagnostic code for type 1 or type 2 DM (i.e., E.10 and E11), 2) were on treatment with antidiabetic drugs, 3) had a register of insulin use within the first 24 hours after admission, or 4) had a glycosylated haemoglobin (HbA1c) value  $\geq 6.5\%$  (48 mmol/mol; first available



1 record after admission) or baseline blood glucose (BG) values  $\geq 200$  mg/dL (11.1 mmol/L; recorded  
2 within the first 24 hours of admission). Subjects with no confirmation of SARS-CoV-2 infection and  
3 those younger than 18 years were excluded from the study.

### 4 *2.3 Study Variables*

5 The following baseline variables were collected: age and sex; SARS-CoV-2 diagnosis (positive RT-  
6 PCR); comorbidities (i.e., hypertension, hyperlipidaemia, obesity [BMI  $\geq 30$  kg/m<sup>2</sup>], CVD, heart  
7 failure, cerebrovascular diseases, ischemic heart disease, CKD, chronic obstructive pulmonary  
8 disease [COPD], asthma, mental disorders, and cancer); blood laboratory parameters (i.e., HbA1c,  
9 BG, electrolytes, renal function, liver function, haematology and coagulation, inflammation  
10 markers, and gas tests); clinical parameters (i.e., systolic and diastolic blood pressure, heart rate,  
11 and temperature), and concomitant medications (i.e., baseline insulins, systemic corticosteroids,  
12 antimicrobials, anticoagulants and antiplatelet agents, and antihypertensive and lipid-lowering  
13 drugs).

14 We considered the following variables as events or complications during the hospital stay: death,  
15 acute respiratory distress syndrome (ARDS), pulmonary thrombosis, neurologic complications  
16 (including encephalopathy, encephalitis, myelitis, and encephalomyelitis), thrombotic  
17 complications identified by ICD-10 diagnostic codes (phlebitis and thrombophlebitis) admission to  
18 ICU, and invasive mechanical ventilation (IMV) identified by ICD-10 procedure codes. The  
19 composite primary outcome was defined as death or IMV.

### 20 *2.4 Statistical Methods*

21 The demographic and clinical characteristics of the two groups of hospitalized patients (i.e., with or  
22 without DM) were compared and summarized at the quantitative (minimum, maximum, median,  
23 first and third quartile, mean, and standard deviation [ $\pm$ SD]) or categorical level (frequency,  
24 number and %).

1 The association between the study outcomes (i.e., mortality and mortality or mechanical  
2 ventilation) and DM was performed using logistic regression analyses adjusted for sex, age, and  
3 associated risk factors. In addition, several models of interest were tested (a model with basic  
4 clinical variables such as age and sex, a model adding obesity, hypertension and hyperlipidaemia,  
5 and a model adding organ lesion variables, such as CVD, heart failure, CKD, COPD), namely with  
6 the sequential inclusion of different covariates and the estimated differences expressed as odds  
7 ratio (OR) and the respective 95% confidence intervals (CI). We evaluated goodness of fit of the  
8 logistic regression models with H&L test (Hosmer–Lemeshow test). To analyse the nonlinear  
9 relationship of random blood glucose levels on admission with the two study outcomes, we used an  
10 adjusted semi-parametric model (generalized additive model [GAM]) calculating the spline curves  
11 with two degrees of freedom (knots) using the mgcv package in R, version 1.8-31[29] with  
12 adjustment for potential confounders. We analysed the entire database available and no statistical  
13 power was calculated. Data management and statistical analyses were performed using the R  
14 statistical software version 3.6.1 (<https://www.r-project.org/>).

### 15 *2.5 Patient and Public Involvement*

16 Patients or the public were not involved in the design, or conduct, or reporting, or dissemination  
17 plans of our research.

## 18 **3. Results**

### 19 *3.1. Baseline Characteristics*

20 Of the 2,306 subjects admitted to hospital within the period of study, 2,069 were over 18 years of  
21 age and had a positive diagnostic test for SARS-CoV-2 (**Figure 1**). Among them, 448 (21.7%) were  
22 identified as having DM and 1,621(78.3%) without DM (non-DM group). The characteristics of the  
23 two populations at hospital admission are shown in **Table 1**. Subjects with DM were on average 5.1  
24 years older than non-DM subjects, and more frequently male (67.9% *vs.* 58.6%). Moreover,

1 individuals in the DM group had a poor comorbidity profile, with a higher frequency of all  
2 assessed prior conditions except for cerebrovascular diseases and asthma.  
3 Regarding laboratory parameters on admission (**Supplementary Table 1**), the DM group had  
4 slightly lower estimated glomerular filtration rates (eGFR) ( $73.5 \pm 26.5$  mL/min/1.73 m<sup>2</sup> vs.  $81.2 \pm 23.9$   
5 mL/min/1.73 m<sup>2</sup>;  $p < 0.001$ ), and higher levels of serum creatinine ( $1.09 \pm 0.72$  mg/dL vs.  $0.94 \pm 0.51$   
6 mg/dL;  $p < 0.001$ ) than the non-DM group. Regarding markers of inflammation and infection, we  
7 observed higher levels of C-reactive protein and procalcitonin in the DM group ( $97.1 \pm 107$  mg/L vs.  
8  $75.9 \pm 82.5$  mg/L and  $0.66 \pm 1.30$  mg/L vs.  $0.39 \pm 1.30$  mg/L, respectively;  $p < 0.001$ ). We also observed  
9 higher levels of D-dimer, a marker of endothelial and coagulation dysfunction in the DM group  
10 ( $3990 \pm 10800$  ng/mL vs.  $2340 \pm 6720$  ng/mL, respectively). Regarding the pharmacological therapy  
11 used during the hospital stay, we observed differences and increased use of almost all drugs of  
12 interest among DM subjects, compared with non-DM, especially for diuretics, systemic  
13 corticosteroids, and tocilizumab.

### 14 3.2 Events and complications during in-hospital stay

15 A total of 301 (14.5%) subjects positive for SARS-CoV-2 died in-hospital, 118 (26.3%) out of 448 in  
16 the DM group and 183 (11.3%) out of 1621 in the non-DM group ( $p < 0.001$ ; **Figure 2**). All studied  
17 events, except pulmonary embolism and thrombotic or neurologic complications, were significantly  
18 more frequent among patients with DM than without (**Figure 2**). The most frequent outcome was  
19 the composite of death or IMV (31% in the DM group vs. 14% in the non-DM group; **Figure 2**)  
20 followed by death (26.3% vs. 11.3%), admission to ICU (21% vs. 6.9%), IMV (10.7% vs. 4.2%), and  
21 ARDS (3.8% vs. 1.5%).

22 The frequency of events by group and age showed that, in both subjects with and without DM,  
23 death and the composite of death or IMV were significantly more frequent among those >65 years  
24 (**Supplementary Figure 1**). In contrast, the proportion of subjects requiring IMV and ICU admission

1 was significantly higher among those  $\leq 65$  years and with DM, while age was not significant in those  
2 without DM. When stratifying the results by sex, we did not observe differences except for  
3 admission to ICU, which was significantly more frequent among male subjects with DM  
4 (**Supplementary Figure 1**). Within the diabetes group, when we stratified by pre-existing DM (DM  
5 codes and/or HBA1c  $\geq 6.5\%$  and/or antidiabetic treatment) and “stress” hyperglycaemia/ unknown  
6 diabetes (glucose  $\geq 200$  mg/dl or insulin use within the first 24h period after admission), we  
7 observed higher percentages for death, death or IMV, ARDS, admission to ICU and IMV events in  
8 subjects with “stress” hyperglycaemia. The results of this stratification are presented in  
9 **Supplementary Table 2**.

### 10 *3.3. Baseline demographic and clinical characteristics associated with in-hospital death and death or IMV*

11 For the overall hospitalized population, the demographic characteristics significantly associated  
12 with mortality were male sex and older age (OR=1.98, 95% CI=1.2–3.3 and OR=1.10, 95% CI=1.08–  
13 1.11, respectively) (**Figure 3; Supplementary Table 3**). The comorbidities independently associated  
14 with increased odds of death were DM (OR=2.33, 95% CI=1.7–3.1), CKD (OR=2.14, 95% CI=1.2–3.7),  
15 and COPD (OR=1.72, 95% CI=1.1–2.8).

16 When considering the composite outcome of death or IMV, the same variables associated with  
17 death (i.e., age, sex, diabetes, CKD, and COPD) were identified as increasing the risk. In addition,  
18 obesity emerged as an independently associated variable (OR=1.98, 95% CI=1.5–2.7) (**Figure 3**,  
19 **Supplementary Table 3**).

20 The multiple logistic regression models were repeated to rule out the potential interaction of DM  
21 with different clinical conditions (i.e., obesity, hyperlipidaemia, obesity and hyperlipidaemia, heart  
22 failure, CKD, and COPD) for the in-hospital death outcome. The results showed that none of these  
23 conditions affected the relationship between the risk of death and DM (**Supplementary Table 4**).

### 24 *3.4. Factors associated with hospital death and death or IMV by comorbid diabetes*

1 A sub-analysis was performed separately for subjects with or without DM. In the DM group, the  
2 only variables independently associated with the risk of both mortality and death or IMV were  
3 male sex, older age, and CKD (**Figure 4A and Supplementary Table 5 and 6**). In contrast, in  
4 subjects without DM, besides the aforementioned variables, the odds of death were also increased  
5 among subjects with CVD (OR=1.94, 95% CI=1.03– 3.7), and the odds of death or IMV among those  
6 with obesity or COPD (OR=2.96, 95% CI=1.7–5.3 and OR=2.30, 95% CI= 1.4 – 3.8, respectively)  
7 (**Figure 4B and Supplementary Table 5 and 6**).

### 8 *3.5. Factors associated with hospital death and death or IMV by glucose levels at admission*

9 We used non-parametric logistic regression models to assess whether there was a relationship  
10 between random BG on admission and the risk of mortality (and death or IMV). We observed a  
11 marked non-linearity in the effect of BG on admission in the risk of both outcomes (**Figure 5A and**  
12 **5B and Supplementary Table 7**). While the risk was increased among subjects with high random  
13 BG levels on admission, the magnitudes of the associated mortality differed depending on the  
14 baseline values, with a large increase in the log-odds of death or IMV with values up to 200 mg/dL  
15 (11.1 mmol/L), and smaller increases above this level. The logistic regression models (**Figure 6A and**  
16 **6B**) showed that the highest probability of death (near 50%) was at around 550 mg/dL (30.6  
17 mmol/L) and, above this value, the mortality risk flattened. Finally, the multivariate model showed  
18 that, beside glucose at admission, male sex, older age, CKD, and COPD were associated with in-  
19 hospital death (**Supplementary Table 7**). These variables were linked to death or IMV too, but  
20 obesity was an additional risk factor (**Supplementary Table 7**).

## 21 **4. Discussion**

22 Data from this cross-sectional study showed that the COVID-19 related in-hospital death rate was  
23 higher among subjects with DM than without. Moreover, DM was independently associated with  
24 the risk of in-hospital case fatality and the composite outcome, death or IMV. In the DM group,

1  
2  
3 1 both outcomes were associated with older age, male sex, and pre-existing CKD. Finally, we  
4  
5 2 observed a non-linear relationship between BG levels on admission and the probability of death  
6  
7 3 and death or IMV in the overall inpatient population.  
8  
9

10  
11 4 In our study, the proportion of severe COVID-19 cases (e.g., requiring IMV or ICU admission) in  
12  
13 5 the DM population was higher than in the non-DM cohort. Moreover, DM patients were more  
14  
15 6 frequently male and over 65 years, had more comorbid conditions, and higher levels of  
16  
17 7 inflammatory, endothelial, and coagulation dysfunction markers on admission. Different meta-  
18  
19 8 analyses have reported that older age and male sex are characteristics associated with severe  
20  
21 9 COVID-19 infection and high fatality rates [17, 30, 31]. Along the same line, studies assessing the  
22  
23 10 phenotypic characteristics of COVID-19 patients with pre-existing DM have found that those with  
24  
25 11 severe infection were older, had more comorbidities (i.e., cerebrovascular disease, CVD,  
26  
27 12 hypertension, and COPD), and increased values of inflammation, endothelial and coagulation  
28  
29 13 dysfunction markers (e.g., D-dimer, procalcitonin, and thrombocytopenia), than those without DM  
30  
31 14 [30- 35].  
32  
33  
34  
35

36  
37 15 In our study, patients with DM had significantly higher creatinine on admission, lower eGFR, and  
38  
39 16 more frequently pre-existing CKD than non-DM subjects. Besides, CKD was the only comorbid  
40  
41 17 condition increasing the odds (three-fold increase) of in-hospital death (and death or IMV) among  
42  
43 18 the DM cohort after adjusting for age, sex, and confounding variables. Different meta-analyses have  
44  
45 19 identified CKD as a risk factor for severity and in-hospital death in SARS-CoV-2 infected patients  
46  
47 20 [7, 36 -38]. Moreover, a recent study conducted in Danish hospital-diagnosed COVID-19 patients  
48  
49 21 reported that kidney insufficiency was independently associated with increased risk of severe  
50  
51 22 disease or death, and the degree of renal impairment inversely correlated with the rate of adverse  
52  
53 23 outcomes [39]. Although it is difficult to distinguish whether poor outcomes are linked to acute  
54  
55 24 kidney injury (AKI) developed during the course of the disease, or to pre-existing CKD [39], a study  
56  
57 25 conducted in Spain showed that patients with increased creatinine on admission, previous CKD, or  
58  
59  
60

1 developing AKI, had a higher risk of in-hospital death than those with normal creatinine on  
2 admission [40]. Of note, the authors found that older age and diabetes, but not other comorbidities,  
3 were associated with in-hospital death [40]. Finally, a study conducted in Mexico reported that,  
4 patients with DM and CKD had a 2-fold higher rate of intubation, 56% higher ICU admission, and  
5 21% excess probability of case-fatality once admitted, than subjects with CKD alone [41].

6 In our study, we used splines as a scientific and preferable alternative to the categorization of BG  
7 levels [42]. We used this approach because a recent dose-response meta-analysis demonstrated a  
8 non-linear relationship between admission fasting blood glucose (FBG) level and COVID-19  
9 severity, with high levels being significantly associated with increased mortality and poor outcome,  
10 regardless of pre-existing DM [43]. These results confirmed previous observations that FBG on  
11 admission, and the odds of being admitted to the ICU, followed a logarithmic association, with  
12 different magnitudes of risk depending on the baseline level [42]. We add to the literature that,  
13 besides the previously reported effect of hyperglycaemia on the risk of COVID-19 severity, ICU  
14 admission, and mortality [24,25], BG has a non-linear relationship with case fatality and the risk of  
15 death or IMV. It is possible that this relationship was also accompanied by, or reflected glycaemic  
16 variability and less time spent in range. Indeed, glycaemic fluctuation has been reported to be  
17 independently associated with poor prognosis and mortality in COVID-19 hospitalized patients  
18 [44]. In the same vein, a study on ICU patients showed that the less time spent in range was  
19 associated with increased utilization of a ventilator, prolonged mechanical ventilation, and  
20 increased mortality [45]. Most importantly, a spline analysis of glucose levels in DM patients with  
21 continuous glucose monitoring showed a non-linear relationship between time spent above range  
22 and glycaemic variability with the increased likelihood of composite adverse COVID-19 outcomes  
23 (need for ICU admission, mechanical ventilation, or critical illness) [46].

#### 24 *4.1 Limitations of this study*

1 The findings of this study must be interpreted with caution and a number of limitations should be  
2 borne in mind. Firstly, we had limited data for SARS-CoV-2 infected persons. For instance, we did  
3 not have access to the patient's medical history prior to admission; so the possibility exists that  
4 some important medical conditions were not included in the emergency room medical report and,  
5 therefore, not included in the analysis. Moreover, data on socio-demographic characteristics  
6 (ethnicity, race, economic or educational status) and toxic habits (smoking, alcohol or drug use)  
7 were not available. Secondly, we had very few registers for some important variables for diabetes,  
8 such as Hb1Ac (data from only 36 patients) and no data on weight or BMI. Indeed, no more than  
9 10% of the patients had documented obesity, which is clearly lower than the expected prevalence in  
10 the general population. This was most probably related to the clinician's under-recording for this  
11 particular condition and to the fact that, during the first wave, obesity had not yet been identified as  
12 a significant risk factor and thus not specifically registered. Thirdly, the selection of subjects with  
13 DM was made based on a proxy algorithm (including DM diagnosis during the hospital stay,  
14 antidiabetic treatment, and HbA1c and blood glucose levels), which could have introduced  
15 selection or referral bias, potentially leading to an inaccurate estimation of DM prevalence. Besides,  
16 we had no access to the patient's treatments prior to hospital admission. Since the proportion of  
17 patients identified as having diabetes and receiving glucose-lowering agents was surprisingly low  
18 (approximately 40%), this can be also attributed to antidiabetic treatment underreporting at  
19 admission. Fourthly, and inherent to data coming from hospital medical records, missing values  
20 could have reduced the statistical power of the study, or produced biased estimates. Fifthly, we  
21 used random BG on admission for the spline analyses, thus preventing the distinction between  
22 stress-related hyperglycaemia and uncontrolled pre-existing DM. This also prevented the analysis  
23 of time in range or BG variability, both being linked to increased severity, case fatality, and poor  
24 COVID-19 outcomes [42-46]. Lastly, the study period coincides with the height of the first  
25 pandemic wave in Spain, when there was a shortage of ventilators and intensive care beds. At this  
26 point, age was the deciding factor for whether or not someone received potentially life-saving ICU



1 care. This might be reflected in our results, where in-hospital death was more frequent among those  
2 over 65 years, but ICU admission was more frequent among those  $\leq 65$  years.

For peer review only

## 1 5. Conclusions

2 The results of our study confirm the high burden associated with DM in patients hospitalized due  
3 to SARS-CoV-2 infection. Comorbid DM poses a challenge to health professionals and the system  
4 because it is associated with severe disease, higher ICU admission rates, IMV, and ultimately death,  
5 particularly among the elderly. The non-linear relationship of hyperglycaemia at admission with  
6 increased odds of death and IMV suggests that, optimizing glycaemic control during the hospital  
7 stay could help to reduce in-hospital death and the composite death/IMV. Besides, out-of-hospital  
8 care should be a priority to reduce or prevent uncontrolled glycaemia among those with DM, as it  
9 could potentially help reduce poor outcomes when hospitalization is required.

10

er review only

1  
2  
3 1 **Ethics approval:** The study was approved by the Ethics Committee of the Primary Health Care University  
4 2 Research Institute (IDIAP) Jordi Gol, Barcelona (approval number: 20/089-PCV). This study does not involve  
5 3 animal subjects.

6  
7 4 **Author Contributions:** Conceptualization, E.O, J.F-N, R.C, M.M-C, B.V, K.K, D.M.; methodology, E.O, J.F-N,  
8 5 R.C, M.M-C, B.V, K.K, D.M.; formal analysis, R.P-T and J.R.; resources and data curation, R.P-T, J.R and B.V.;  
9 6 writing—original draft preparation, B.V and M.G.; writing—review and editing, E.O, J.F-N, R.C, M.M-C, M.G,  
10 7 FX.C-C, E.C, B.V, K.K, D.M and P.D.; supervision: D.M, R.C and J.F-N.; project administration: B.V.

11 8 **Acknowledgements:** COVID DATA SAVE LIVES -Hospitales HM for providing database. CIBER of Diabetes  
12 9 and Associated Metabolic Diseases (CIBERDEM) and CIBER of physiopathology of obesity and Nutrition  
13 10 (CIBEROBN) are initiatives from the Instituto de Salud Carlos III, Madrid, Spain. The authors acknowledge  
14 11 Amanda Prowse (Lochside Medical communications Ltd.) for providing support in paper editing. KK is  
15 12 supported by the National Institute for Health Research (NIHR) Applied Research Collaboration East  
16 13 Midlands (ARC EM) and the NIHR Leicester Biomedical Research Centre (BRC).

17  
18 14 **Funding:** This study was supported by the Primary Care Diabetes Europe grant (grant number FEr20/0020)

19 15 **Data availability:** Data may be obtained from a third party and are not publicly available.

20 16 **Competing Interest:** The funders had no role in the design of the study; in the collection, analyses, or  
21 17 interpretation of data; in the writing of the manuscript, or in the decision to publish the results.

22 18 E.O. has received advisory and or speaking fees from Astra-Zeneca, Boehringer Ingelheim, Lilly, MSD, Novo  
23 19 Nordisk, Sanofi, and Amgen; they received research grants to the institution from MSD and Amgen.

24 20 R.C. has received advisory and/or speaking fees from Abbott, Ascensia, Lilly, MSD, Novo Nordisk and Sanofi.

25 21 M. M-C. has received advisory honorarium from Astra-Zeneca, Bayer, Boehringer Ingelheim, GSK, Lilly, MSD,  
26 22 Novartis, Novo Nordisk, and Sanofi; they received speaker honoraria from Astra-Zeneca, Bayer, Boehringer  
27 23 Ingelheim, GSK, Lilly, Menarini, MSD, Novartis, Novo Nordisk, and Sanofi; they received research grants to  
28 24 the institution from Astra-Zeneca, GSK, Lilly, MSD, Novartis, Novo Nordisk, and Sanofi.

29 25 J. F-N has received advisory and or speaking fees from Astra-Zeneca, Ascensia, Boehringer Ingelheim, GSK,  
30 26 Lilly, MSD, Novartis, Novo Nordisk, and Sanofi; they received research grants to the institution from Astra-  
31 27 Zeneca, GSK, Lilly, MSD, Novartis, Novo Nordisk, Sanofi, and Boehringer.

32 28 K.K. has acted as a consultant, speaker or received grants for investigator-initiated studies for Astra Zeneca,  
33 29 Novartis, Novo Nordisk, Sanofi-Aventis, Lilly and Merck Sharp & Dohme, Boehringer Ingelheim, Bayer,  
34 30 Berlin-Chemie AG / Menarini Group, Janssen, and Napp

35 31 D. M. has received advisory and/or speaking fees from Astra-Zeneca, Ascensia, Boehringer Ingelheim, GSK,  
36 32 Lilly, MSD, Novartis, Novo Nordisk, and Sanofi; they received research grants to the institution from Astra-  
37 33 Zeneca, GSK, Lilly, MSD, Novartis, Novo Nordisk, Sanofi, and Boehringer.

38 34 P. D. has received lecture and Advisory Board fees from Gilead Sciences, Roche, Merck, Sharp & Dohme, ViiV  
39 35 Healthcare, Janssen & Cilag, Theratechnologies, Boehringer Ingelheim, and Ferrer International. P.D. has  
40 36 received research grants from Gilead Sciences, ViiV Healthcare, GSK, Janssen & Cilag, and Boehringer  
41 37 Ingelheim.

42 38 B. V, FX.C-C, J.R, R.P-T, M.G, and E.C. have no conflict of interest to declare.

43  
44  
45  
46  
47  
48  
49 39  
50  
51  
52  
53  
54  
55  
56  
57  
58  
59  
60

## References

1. World Health Organization. 15-Novel Coronavirus(2019-nCoV). WHO Bull 2020; 1–7.
2. Agència de Salut Pública de Catalunya (ASPCAT). Informe tècnic resum dels casos de covid-19 a Catalunya, [http://salutpublica.gencat.cat/web/.content/minisite/aspcat/butlletins/vigilanciaaspcat/2020/45/INF-ORME-TECNIC-3-COVID-19\\_020420.pdf](http://salutpublica.gencat.cat/web/.content/minisite/aspcat/butlletins/vigilanciaaspcat/2020/45/INF-ORME-TECNIC-3-COVID-19_020420.pdf) (2020).
3. Linde, Pablo (February 1, 2020). «Sanidad confirma en La Gomera el primer caso de coronavirus en España». El País. ISSN 1134-6582. Consulted March 10, 2020. Available from: [https://elpais.com/sociedad/2020/01/31/actualidad/1580509404\\_469734.htm](https://elpais.com/sociedad/2020/01/31/actualidad/1580509404_469734.htm)
4. Muniyappa R, Gubbi S. COVID-19 pandemic, coronaviruses, and diabetes mellitus. *American Journal of Physiology-Endocrinology and Metabolism* 2020;318(5):E736-E741.
5. Zhou Y, Yang Q, Chi J, *et al.* Comorbidities and the risk of severe or fatal outcomes associated with coronavirus disease 2019: A systematic review and meta-analysis. *Int J Infect Dis* 2020; 99: 47–56.
6. Deng G, Yin M, Chen X, *et al.* Clinical determinants for fatality of 44,672 patients with COVID-19. *Crit Care* 2020; 24: 179.
7. Mesas AE, Cavero-Redondo I, Álvarez-Bueno C, *et al.* Predictors of in-hospital COVID-19 mortality: A comprehensive systematic review and meta-analysis exploring differences by age, sex and health conditions. *PLoS One* 2020; 15: e0241742.
8. Pendu J Le, Breiman A, Rocher J, *et al.* ABO Blood Types and COVID-19: Spurious, Anecdotal, or Truly Important Relationships? A Reasoned Review of Available Data. *Viruses* 2021;13:160. doi:10.3390/v13020160
9. Sardu C, Marfella R, Maggi P, *et al.* Implications of ABO blood group in hypertensive patients with covid-19. *BMC Cardiovasc Disord* 2020;20:373. doi:10.1186/s12872-020-01658-z
10. Hoffmann M, Kleine-Weber H, Schroeder S, *et al.* SARS-CoV-2 Cell Entry Depends on ACE2 and TMPRSS2 and Is Blocked by a Clinically Proven Protease Inhibitor. *Cell* 2020;181:271-280.e8. doi:10.1016/j.cell.2020.02.052
11. Baral R, Tsampasian V, Debski M, *et al.* Association Between Renin-Angiotensin-Aldosterone System Inhibitors and Clinical Outcomes in Patients With COVID-19. *JAMA Netw Open* 2021;4:e213594. doi:10.1001/jamanetworkopen.2021.3594
12. Matarese A, Gambardella J, Sardu C, *et al.* miR-98 Regulates TMPRSS2 Expression in Human Endothelial Cells: Key Implications for COVID-19. *Biomedicines* 2020;8:462. doi:10.3390/biomedicines8110462
13. Papazafiropoulou AK, Antonopoulos S. The COVID-19 pandemic and diabetes mellitus. *Archives of Medical Sciences. Atherosclerotic Diseases* 2020;5:e200.
- 14 McDonald HI, Nitsch D, Millett E, Sinclair A, Thomas SL. New estimates of the burden of acute community-acquired infections among older people with diabetes mellitus: a retrospective cohort study using linked electronic health records. *Diabetic Med* 2014;31(5):606-614.

- 1  
2  
3  
4 1 15. Li S, Wang J, Zhang B, Li X, Liu Y. Diabetes mellitus and cause-specific mortality: a population-  
5 2 based study. *Diabetes & metabolism journal* 2019;43(3):319-341.
- 6  
7 3 16. Del Sole F, Farcomeni A, Loffredo L, Carnevale R, Menichelli D, Vicario T, *et al.* Features of  
8 4 severe COVID-19: A systematic review and meta-analysis. *Eur J Clin Invest* 2020;50:0–1.  
9 5 <https://doi.org/10.1111/eci.13378>.
- 10  
11 6 17. Pugliese G, Vitale M, Resi V, Orsi E. Is diabetes mellitus a risk factor for COroNaVirus Disease  
12 7 19 (COVID-19)? *Acta Diabetol* 2020;19. <https://doi.org/10.1007/s00592-020-01586-6>.
- 13  
14 8 18. Peric S, Stulnig TM. Diabetes and COVID-19. *Wien Klin Wochenschr* 2020;132:356–61.  
15 9 [doi:10.1007/s00508-020-01672-3](https://doi.org/10.1007/s00508-020-01672-3)
- 16  
17 10 19. Barron E, Bakhai C, Kar P, Weaver A, Bradley D, Ismail H, *et al.* Associations of type 1 and type  
18 11 2 diabetes with COVID-19-related mortality in England: a whole-population study. *The Lancet*  
19 12 *Diabetes & Endocrinology* 2020.
- 20  
21 13 20. Tian W, Jiang W, Yao J, Nicholson CJ, Li RH, Sigurslid HH, *et al.* Predictors of mortality in  
22 14 hospitalized COVID-19 patients: A systematic review and meta-analysis. *J Med Virol* 2020.
- 23  
24 15 21. Mantovani A, Byrne CD, Zheng M, Targher G. Diabetes as a risk factor for greater COVID-19  
25 16 severity and in-hospital death: A meta-analysis of observational studies. *Nutrition, Metabolism and*  
26 17 *Cardiovascular Diseases* 2020;30(8):1236-1248.
- 27  
28 18 22. Wu C, Chen X, Cai Y, *et al.* Risk Factors Associated With Acute Respiratory Distress Syndrome  
29 19 and Death in Patients With Coronavirus Disease 2019 Pneumonia in Wuhan, China. *JAMA Intern*  
30 20 *Med* 2020;180:934-43.
- 31  
32 21 23. Li X, Xu S, Yu M, *et al.* Risk factors for severity and mortality in adult COVID-19 inpatients in  
33 22 Wuhan. *J Allergy Clin Immunol* 2020;146:110-8.
- 34  
35 23 24. Lee MH, Wong C, Ng CH, Yuen DCW, Lim AYL, Khoo CM. Effects of hyperglycaemia on  
36 24 complications of COVID-19: A meta-analysis of observational studies. *Diabetes Obes Metab*  
37 25 2021;23:287-9.
- 38  
39 26 25. Yang Y, Cai Z, Zhang J. Hyperglycemia at admission is a strong predictor of mortality and  
40 27 severe/critical complications in COVID-19 patients: a meta-analysis. *Biosci Rep* 2021;41.
- 41  
42 28 26. Marfella R, Paolisso P, Sardu C, *et al.* Negative impact of hyperglycaemia on tocilizumab  
43 29 therapy in Covid-19 patients. *Diabetes Metab* 2020;46:403-5.
- 44  
45 30 27. Soriguer F, Goday A, Bosch-Comas A, Bordiú E, Calle-Pascual A, Carmena R, *et al.* Prevalence of  
46 31 diabetes mellitus and impaired glucose regulation in Spain: the Di@bet.es Study. *Diabetologia* 2012;  
47 32 55(1):88-93.
- 48  
49 33 28. Caballero AE, Ceriello A, Misra A, *et al.* COVID-19 in people living with diabetes: An  
50 34 international consensus. *J Diabetes Complications* 2020; 34: 107671.
- 51  
52 35 29. Wood S (2019) mgcv: mixed GAM computation vehicle with automatic smoothness estimation.  
53 36 R-package version 1.8–31. <https://CRAN.R-project.org/package=mgcv>
- 54  
55 37 30. Li G, Deng Q, Feng J, Li F, Xiong N, He Q. Clinical Characteristics of Diabetic Patients with  
56 38 COVID-19. *J Diabetes Res* 2020;2020:1652403. <https://doi.org/10.1155/2020/1652403>.
- 57  
58  
59  
60

- 1  
2  
3 1 31. Izcovich A, Ragusa MA, Tortosa F, *et al.* Prognostic factors for severity and mortality in patients  
4 2 infected with COVID-19: A systematic review. *PLoS One* 2020; 15: e0241955.
- 6 3 32. Cariou B, Hadjadj S, Wargny M, Pichelin M, Al-Salameh A, Allix I, *et al.* Phenotypic  
7 4 characteristics and prognosis of inpatients with COVID-19 and diabetes: the CORONADO study.  
8 5 *Diabetologia* 2020;63:1500–15. <https://doi.org/10.1007/s00125-020-05180-x>.
- 11 6 33. Zhu L, She Z-G, Cheng X, *et al.* Association of Blood Glucose Control and Outcomes in Patients  
12 7 with COVID-19 and Pre-existing Type 2 Diabetes. *Cell Metab* 2020; 31: 1068-1077.e3.
- 14 8 34. Elamari S, Motaib I, Zbiri S, *et al.* Characteristics and outcomes of diabetic patients infected by  
15 9 the SARS-CoV-2. *Pan Afr Med J*; 37. Epub ahead of print 2020. DOI: 10.11604/pamj.2020.37.32.25192.
- 17 10 35. Yan Y, Yang Y, Wang F, *et al.* Clinical characteristics and outcomes of patients with severe covid-  
18 11 19 with diabetes. *BMJ Open Diabetes Res Care* 2020; 8: e001343.
- 21 12 36. Laguna-Goya R, Utrero-Rico A, Talayero P, *et al.* IL-6–based mortality risk model for  
22 13 hospitalized patients with COVID-19. *J Allergy Clin Immunol* 2020; 146: 799-807.e9.
- 24 14 37. Working group for the surveillance and control of COVID-19 in Spain. Redondo-Bravo L, *et al.*  
25 15 The first wave of the COVID-19 pandemic in Spain: characterisation of cases and risk factors for  
26 16 severe outcomes, as at 27 April 2020. *Eurosurveillance* 2020;25:2001431. doi:10.2807/1560-  
27 17 7917.ES.2020.25.50.2001431
- 29 18 38. Tian W, Jiang W, Yao J, *et al.* Predictors of mortality in hospitalized COVID-19 patients: A  
30 19 systematic review and meta-analysis. *J Med Virol* 2020; 92: 1875–1883.
- 32 20 39. Carlson N, Nelveg-Kristensen K -E., Freese Ballegaard E, *et al.* Increased vulnerability to  
33 21 COVID-19 in chronic kidney disease. *J Intern Med* 2021; joim.13239.
- 36 22 40. Portolés J, Marques M, López-Sánchez P, *et al.* Chronic kidney disease and acute kidney injury  
37 23 in the COVID-19 Spanish outbreak. *Nephrol Dial Transplant* 2020; 35: 1353–1361.
- 39 24 41. Leon-Abarca JA, Memon RS, Rehan B, *et al.* The impact of COVID-19 in diabetic kidney disease  
40 25 and chronic kidney disease: A population-based study. medrxiv. Epub ahead of print 2020. DOI:  
41 26 <https://doi.org/10.1101/2020.09.12.20193235>.
- 43 27 42. Alahmad B, Al-Shammari AA, Bennakhi A, *et al.* Fasting Blood Glucose and COVID-19 Severity:  
44 28 Nonlinearity Matters. *Diabetes Care* 2020; 43: 3113–3116.
- 46 29 43. Lazarus G, Audrey J, Wangsaputra VK, *et al.* High admission blood glucose independently  
47 30 predicts poor prognosis in COVID-19 patients: A systematic review and dose-response meta-  
48 31 analysis. *Diabetes Res Clin Pract* 2021; 171: 108561.
- 51 32 44. Chen L, Sun W, Liu Y, *et al.* Association of Early-Phase In-Hospital Glycemic Fluctuation With  
52 33 Mortality in Adult Patients With Coronavirus Disease 2019. *Diabetes Care* 2021; dc200780.
- 54 34 45. Kapoor R, Timsina LR, Gupta N, *et al.* Maintaining Blood Glucose Levels in Range (70–150  
55 35 mg/dL) is Difficult in COVID-19 Compared to Non-COVID-19 ICU Patients—A Retrospective  
56 36 Analysis. *J Clin Med* 2020; 9: 3635.

- 1  
2  
3 1 46. Shen Y, Fan X, Zhang L, *et al.* Thresholds of Glycemia and the Outcomes of COVID-19  
4 2 Complicated With Diabetes: A Retrospective Exploratory Study Using Continuous Glucose  
5 3 Monitoring. *Diabetes Care* 2021; dc201448.  
6  
7  
8 4  
9 5  
10  
11  
12  
13  
14  
15  
16  
17  
18  
19  
20  
21  
22  
23  
24  
25  
26  
27  
28  
29  
30  
31  
32  
33  
34  
35  
36  
37  
38  
39  
40  
41  
42  
43  
44  
45  
46  
47  
48  
49  
50  
51  
52  
53  
54  
55  
56  
57  
58  
59  
60

For peer review only

1 **Table 1.** Baseline characteristics of the studied cohorts at hospital admission

| Characteristic                        | Overall study population<br>N=2069 | Diabetes<br>N=448 | No diabetes<br>N=1621 | p-value |
|---------------------------------------|------------------------------------|-------------------|-----------------------|---------|
| Age, mean (SD), years                 | 67.8 (15.7)                        | 71.7 (11.9)       | 66.6 (16.3)           | <0.001  |
| Age, median (P25, P75), years         | 69.0 (57.0, 80.0)                  | 72.0 (64.0; 80.0) | 67.0 (55.0; 79.0)     | <0.001  |
| Sex (male), n (%)                     | 1205 (60.3)                        | 304 (67.9)        | 950 (58.6)            | <0.001  |
| Glucose, mean, (SD)                   |                                    |                   |                       |         |
| mg/dL                                 | 124 (47.7)                         | 168 (74.4)        | 112 (24.8)            | <0.001  |
| mmol/L                                | 6.8(2.6)                           | 9.3 (4.1)         | 6.2 (1.4)             |         |
| <b>Comorbidities, n (%)</b>           |                                    |                   |                       |         |
| Hypertension                          | 651 (31.5)                         | 224 (50.0)        | 427 (26.3)            | <0.001  |
| Hyperlipidaemia                       | 409 (19.8)                         | 154 (34.4)        | 255 (15.7)            | <0.001  |
| Obesity                               | 117 (5.65)                         | 45 (10.0)         | 72 (4.44)             | <0.001  |
| Cardiovascular diseases               | 77 (3.72)                          | 28 (6.25)         | 49 (3.02)             | 0.002   |
| Heart failure                         | 51 (2.46)                          | 18 (4.02)         | 33 (2.04)             | 0.026   |
| Cerebrovascular diseases              | 27 (1.30)                          | 10 (2.23)         | 17 (1.05)             | 0.086   |
| Ischemic heart disease                | 47 (2.27)                          | 18 (4.02)         | 29 (1.79)             | 0.009   |
| Chronic kidney disease                | 76 (3.67)                          | 30 (6.70)         | 46 (2.84)             | <0.001  |
| Chronic obstructive pulmonary disease | 112 (5.41)                         | 34 (7.59)         | 78 (4.81)             | 0.029   |
| Asthma                                | 2 (0.10)                           | 0 (0.00)          | 2 (0.12)              | 1.000   |
| Mental disorders                      | 114 (5.51)                         | 35 (7.81)         | 79 (4.87)             | 0.022   |
| Cancer                                | 117 (5.65)                         | 36 (8.04)         | 81 (5.00)             | 0.019   |
| <b>Pharmacological therapy, n (%)</b> |                                    |                   |                       |         |
| Biguanides                            | 66 (3.19)                          | 66 (14.7)         | 0 (0.00)              | <0.001  |
| Sulfonylureas                         | 1 (0.05)                           | 1 (0.22)          | 0 (0.00)              | 0.217   |
| Dipeptidyl peptidase 4 inhibitors     | 11 (0.53)                          | 11 (2.46)         | 0 (0.00)              | <0.001  |
| Fast-acting insulins                  | 95 (4.5)                           | 66 (14.7)         | 29 (1.79)             | <0.001  |
| Intermediate-acting insulins          | 9 (0.43)                           | 7 (1.56)          | 2 (0.12)              | 0.001   |
| Long-acting insulins                  | 23 (1.11)                          | 20 (4.46)         | 3 (0.19)              | <0.001  |
| Antibiotics                           | 1882 (91.0)                        | 421 (94.0)        | 1461 (90.1)           | 0.016   |
| Antithrombotics                       | 1752 (84.7)                        | 396 (88.4)        | 1356 (83.7)           | 0.017   |
| Renin-angiotensin system agents       | 523 (25.3)                         | 153 (34.2)        | 370 (22.8)            | <0.001  |
| Beta blocking agents                  | 316 (15.3)                         | 104 (23.2)        | 212 (13.1)            | <0.001  |
| Calcium channel blockers              | 384 (18.6)                         | 118 (26.3)        | 266 (16.4)            | <0.001  |
| Diuretics                             | 508 (24.6)                         | 185 (41.3)        | 323 (19.9)            | <0.001  |
| Statins                               | 256 (12.4)                         | 88 (19.6)         | 168 (10.4)            | <0.001  |
| Systemic corticosteroids              | 977 (47.2)                         | 267 (59.6)        | 710 (43.8)            | <0.001  |
| Tocilizumab                           | 421 (20.3)                         | 137 (30.6)        | 284 (17.5)            | <0.001  |

DM, diabetes mellitus; P25, P75, 25<sup>th</sup> and 75<sup>th</sup> percentile, respectively; SD, standard deviation

## Figure legend/caption



**Figure 1.** Flowchart diagram

**Figure 2.** Proportion of events (%) during hospitalization according to the presence of diabetes.

Legend: ARDS, acute respiratory distress syndrome; DM, diabetes mellitus; ICU, intensive care unit; IMV, invasive mechanical ventilation. \*\*\*  $p < 0.001$ ; \*\*  $p < 0.01$ ; \*  $p < 0.05$

**Figure 3.** Clinical and demographic variables associated with increased risk of in-hospital death and the composite outcome of death or invasive mechanical ventilation.

Legend: CKD, chronic kidney disease; COPD, chronic obstructive pulmonary disease; CVD, cardiovascular disease; DM, diabetes mellitus; HF, heart failure; IMV, invasive mechanical ventilation

**Figure 4.** Clinical and demographic variables associated with increased risk of in-hospital death and the composite outcome of death and/or invasive mechanical ventilation in subjects with diabetes (A) and without diabetes (B).

Legend: CKD, chronic kidney disease; COPD, chronic obstructive pulmonary disease; CVD, cardiovascular disease; DM, diabetes mellitus; HF, heart failure; IMV, invasive mechanical ventilation

**Figure 5.** Spline plot demonstrating a marked non-linearity in the relationship between plasma glucose (mg/dL) levels on admission and the log odds of death (A) and death or invasive mechanical ventilation (IMV) rate (B). Tick marks above the horizontal axis indicate the values at which the observations were made. The dotted lines represent the 95% confidence interval. The model was adjusted for age, sex, obesity, hypertension, hyperlipidaemia, history of CVD, HF, CKD, and COPD.

Legend: IMV, intensive mechanical ventilation; CVD, cardiovascular disease; HF, heart failure; CKD, chronic kidney disease; COPD, chronic obstructive pulmonary disease

**Figure 6.** Predicted probability of in-hospital death (A) and death or IMV (B) based on generalized smoothing splines. The shaded area represents the 95% confidence interval. The model was adjusted for age, sex, obesity, hypertension, hyperlipidaemia, history of CVD, HF, CKD, and COPD

Legend: IMV, intensive mechanical ventilation; CVD, cardiovascular disease; HF, heart failure; CKD, chronic kidney disease; COPD, chronic obstructive pulmonary disease

1  
2  
3  
4 **Supplement figure legend/caption**  
5  
6

7 **Supplementary Figure 1.** Proportion of events (%) during hospitalization according to the presence  
8 of diabetes and age group (A) and sex (B).  
9

10 Legend: ARDS, acute respiratory distress syndrome; DM, diabetes mellitus; ICU, intensive care  
11 unit; IMV, invasive mechanical ventilation. \*\*\* p<0.001; \*\* p<0.01; \* p<0.05  
12  
13  
14  
15  
16  
17  
18  
19  
20  
21  
22  
23  
24  
25  
26  
27  
28  
29  
30  
31  
32  
33  
34  
35  
36  
37  
38  
39  
40  
41  
42  
43  
44  
45  
46  
47  
48  
49  
50  
51  
52  
53  
54  
55  
56  
57  
58  
59  
60

Or peer review only

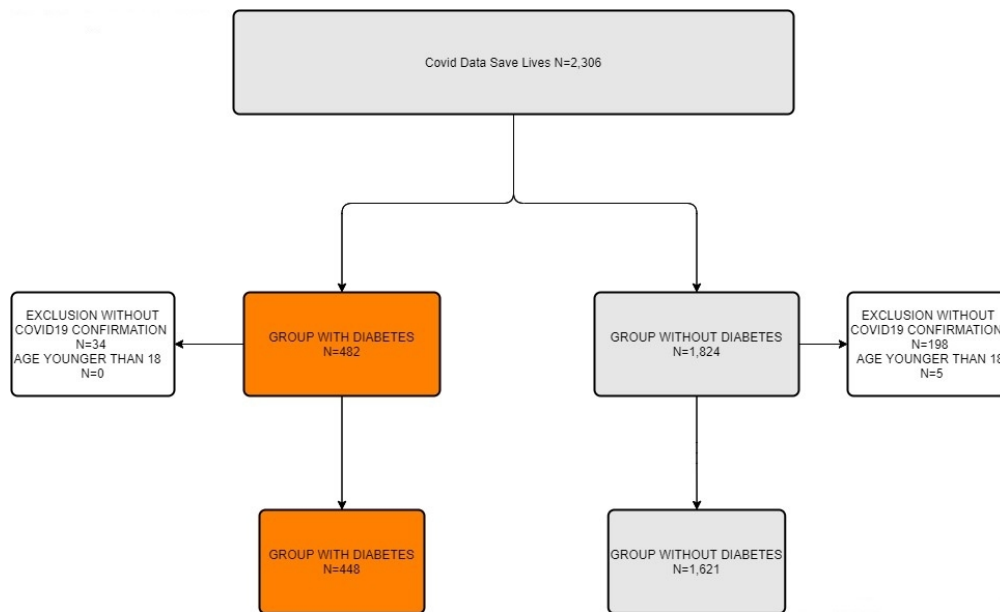

Figure 1. Flowchart diagram

255x154mm (96 x 96 DPI)

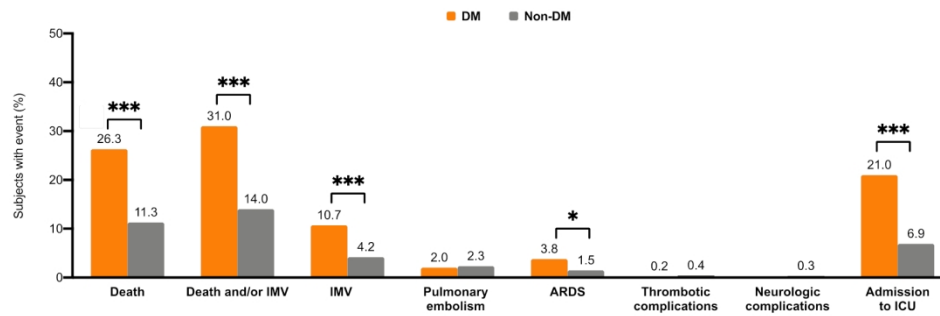

Figure 2. Proportion of events (%) during hospitalization according to the presence of diabetes.

Legend: ARDS, acute respiratory distress syndrome; DM, diabetes mellitus; ICU, intensive care unit; IMV, invasive mechanical ventilation. \*\*\*  $p < 0.001$ ; \*\*  $p < 0.01$ ; \*  $p < 0.05$

491x163mm (96 x 96 DPI)

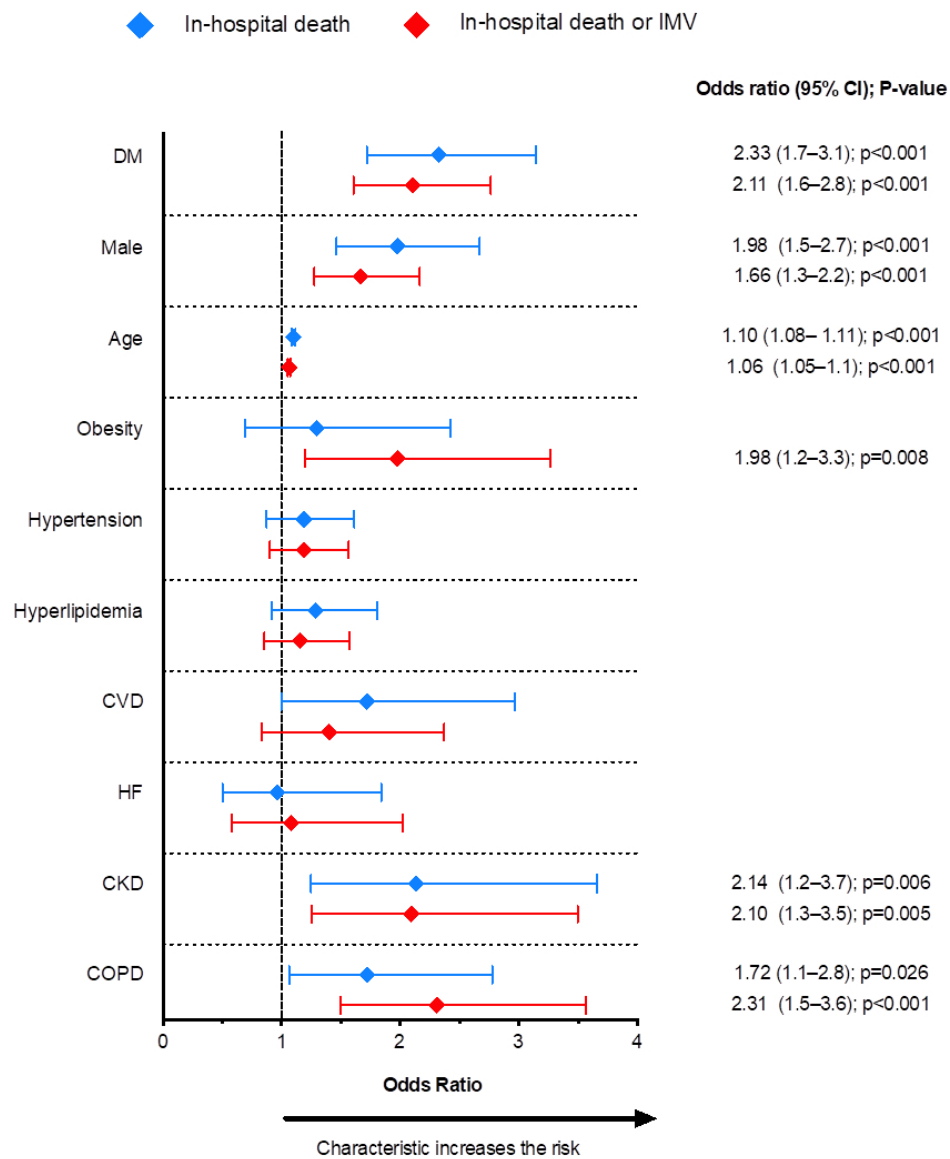

Figure 3. Clinical and demographic variables associated with increased risk of in-hospital death and the composite outcome of death or invasive mechanical ventilation.

Legend: CKD, chronic kidney disease; COPD, chronic obstructive pulmonary disease; CVD, cardiovascular disease; DM, diabetes mellitus; HF, heart failure; IMV, invasive mechanical ventilation

233x285mm (96 x 96 DPI)

## A. Subjects with diabetes

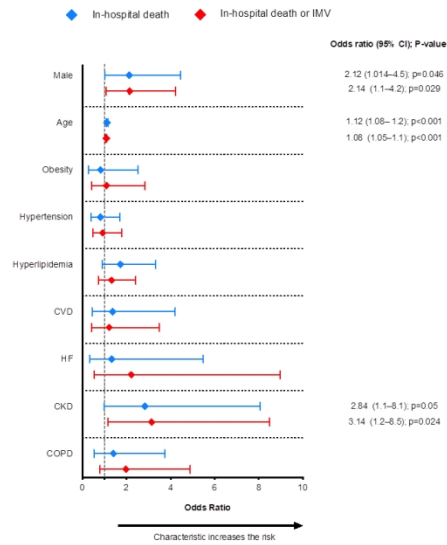

## B. Subjects without diabetes

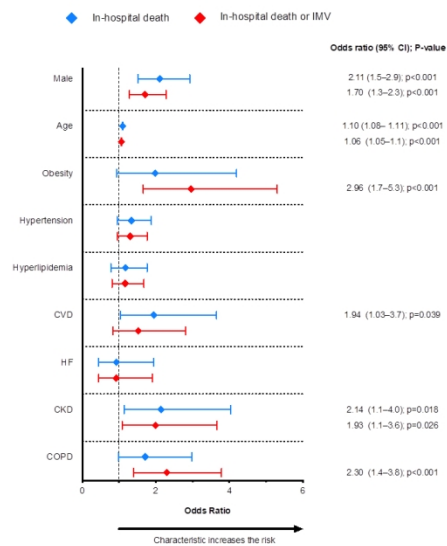

Figure 4. Clinical and demographic variables associated with increased risk of in-hospital death and the composite outcome of death and/or invasive mechanical ventilation in subjects with diabetes (A) and without diabetes (B).

Legend: CKD, chronic kidney disease; COPD, chronic obstructive pulmonary disease; CVD, cardiovascular disease; DM, diabetes mellitus; HF, heart failure; IMV, invasive mechanical ventilation

218x505mm (96 x 96 DPI)

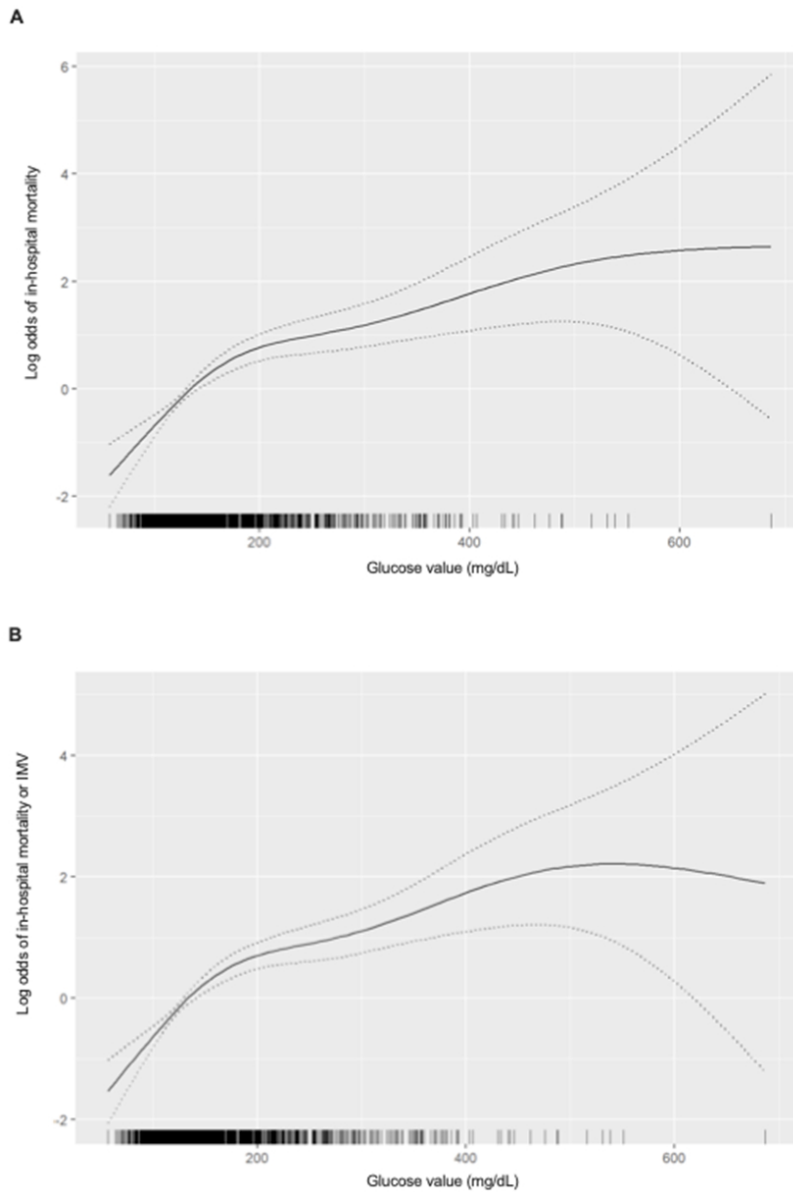

Figure 5. Spline plot demonstrating a marked non-linearity in the relationship between plasma glucose (mg/dL) levels on admission and the log odds of death (A) and death or invasive mechanical ventilation (IMV) rate (B). Tick marks above the horizontal axis indicate the values at which the observations were made. The dotted lines represent the 95% confidence interval. The model was adjusted for age, sex, obesity, hypertension, hyperlipidaemia, history of CVD, HF, CKD, and COPD.

Legend: IMV, intensive mechanical ventilation; CVD, cardiovascular disease; HF, heart failure; CKD, chronic kidney disease; COPD, chronic obstructive pulmonary disease

219x323mm (96 x 96 DPI)

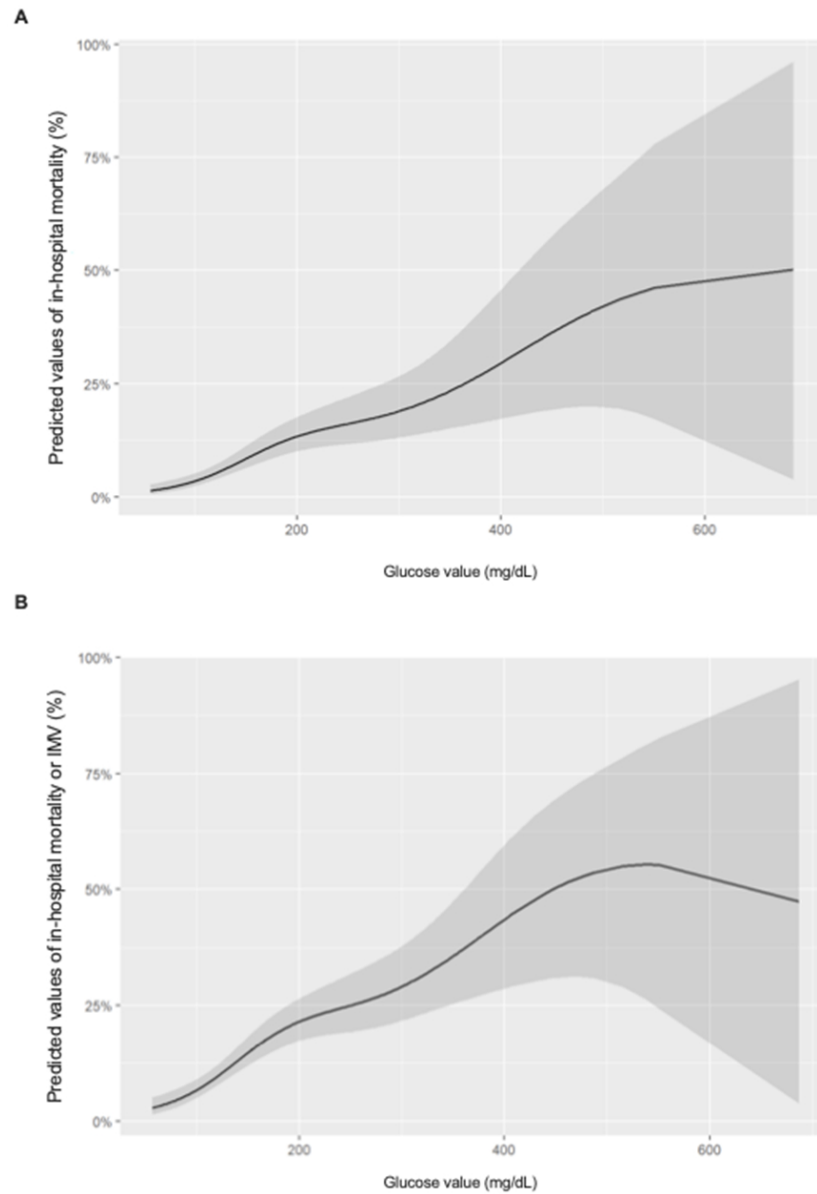

45 Figure 6. Predicted probability of in-hospital death (A) and death or IMV (B) based on generalized smoothing  
46 splines. The shaded area represents the 95% confidence interval. The model was adjusted for age, sex,  
47 obesity, hypertension, hyperlipidaemia, history of CVD, HF, CKD, and COPD

48 Legend: IMV, intensive mechanical ventilation; CVD, cardiovascular disease; HF, heart failure; CKD, chronic  
49 kidney disease; COPD, chronic obstructive pulmonary disease

50  
51 231x333mm (96 x 96 DPI)



## ONLINE-ONLY SUPPLEMENTARY MATERIALS

These supplemental materials have been provided by the authors to give the readers additional information about the study.

# Risk factors for severe outcomes in people with diabetes hospitalized for COVID-19: A cross-sectional “Covid Data Save Lives” database study

Emilio Ortega <sup>1,2,3</sup>, Rosa Corcoy <sup>4,5,6</sup>, Mònica Gratacòs<sup>1</sup>, Xavier Cos-Claramunt <sup>1,7</sup>, Manel Mata-Cases <sup>1,8,10</sup>, Ramon Puig-Treserra<sup>1</sup>, Jordi Real <sup>1</sup>, Bogdan Vlacho <sup>1</sup>, Esmeralda Castelblanco <sup>1,8</sup>, Pere Domingo <sup>9</sup>, Kamlesh Khunti <sup>11</sup>, Josep Franch-Nadal <sup>1,8,12\*</sup> and Dídac Mauricio <sup>1,4,8,13\*</sup>

### TABLE OF CONTENTS

|                                |                                                                                                                                                                                                                 | PAGE |
|--------------------------------|-----------------------------------------------------------------------------------------------------------------------------------------------------------------------------------------------------------------|------|
| <b>Supplementary Table 1</b>   | Basal vital signs and laboratory measurements of patients admitted for coronavirus according to the presence of diabetes mellitus                                                                               | 2    |
| <b>Supplementary Figure 1.</b> | Proportion of events (%) during hospitalization according to the presence of diabetes and age group (A) and sex (B).                                                                                            | 4    |
| <b>Supplementary Table 2.</b>  | Number of events in patients with pre-existing diabetes and stress hyperglycaemia/unknown diabetes.                                                                                                             | 5    |
| <b>Supplementary Table 3.</b>  | Clinical characteristics at baseline as predictors of death vs death or invasive mechanical ventilation according to the model with all potential independent variables included.                               | 6    |
| <b>Supplementary Table 4.</b>  | Mortality model evaluating diabetes and interactions with other clinical comorbid conditions regarding the outcome of death.                                                                                    | 7    |
| <b>Supplementary Table 5.</b>  | Clinical characteristics at baseline associated with in-hospital death stratified for diabetes status (model 3, namely the model with all demographic and clinical variables included).                         | 8    |
| <b>Supplementary Table 6.</b>  | Clinical characteristics at baseline associated to in-hospital death or mechanical ventilation stratified for diabetes status (model 3, namely the model with all demographic and clinical variables included). | 9    |
| <b>Supplementary Table 7.</b>  | Multivariate model of the association between predictors and the odds of death and death or invasive mechanical ventilation based on the nonlinear glucose curve.                                               | 10   |
| <b>Supplementary text</b>      | Database description.                                                                                                                                                                                           | 11   |

**Supplementary Table 1.** Basal vital signs and laboratory measurements of patients admitted for coronavirus according to the presence of diabetes mellitus

|                                                                        | <b>Diabetes<br/>N=448</b> | <b>No diabetes<br/>N=1621</b> | p-value |
|------------------------------------------------------------------------|---------------------------|-------------------------------|---------|
| <b>Vital signs</b>                                                     |                           |                               |         |
| Systolic blood arterial pressure, mean (SD), mmHg                      | 128 (19.7)                | 123 (19.3)                    | 0.037   |
| Diastolic blood arterial pressure, mean (SD), mmHg                     | 72.0 (12.1)               | 71.1 (12.5)                   | 0.501   |
| Heart rate, mean (SD), bpm                                             | 80.2 (14.7)               | 79.4 (14.9)                   | 0.641   |
| Temperature, mean (SD), °C                                             | 36.5 (0.823)              | 36.5 (0.805)                  | 0.086   |
| <b>Basal laboratory measurements</b>                                   |                           |                               |         |
| <b>Renal function</b>                                                  |                           |                               |         |
| Glomerular filtration (CKD-EPI), mean (SD), mL/min/1.73 m <sup>2</sup> | 73.5 (26.5)               | 81.2 (23.9)                   | <0.001  |
| Creatinine, mean (SD), mg/dL                                           | 1.09 (0.716)              | 0.943 (0.510)                 | <0.001  |
| <b>Inflammation markers</b>                                            |                           |                               |         |
| Procalcitonin, mean (SD), ng/mL                                        | 0.661 (1.30)              | 0.387 (1.30)                  | <0.001  |
| C-reactive protein, mean (SD), mg/L                                    | 97.1 (107)                | 75.9 (82.5)                   | <0.001  |
| <b>Other biochemical markers</b>                                       |                           |                               |         |
| D-dimer, mean (SD), ng/mL                                              | 3990 (10800)              | 2340 (6720)                   | <0.001  |
| <b>Liver function</b>                                                  |                           |                               |         |
| Alkaline phosphatase, mean (SD), U/L                                   | 78.3 (39.1)               | 78.6 (62.3)                   | 0.984   |
| Lactate dehydrogenase, mean (SD), U/L                                  | 644 (399)                 | 575 (311)                     | <0.001  |
| Gamma-glutamyl transferase, mean (SD), U/L                             | 93.8 (135)                | 88.4 (123)                    | 0.804   |
| Aspartate aminotransferase, mean (SD), U/L                             | 49.6 (165)                | 42.7 (57.8)                   | 0.022   |
| Alanine aminotransferase, mean (SD), U/L                               | 51.7 (136)                | 45.1 (60.6)                   | 0.354   |
| <b>Haematology parameters</b>                                          |                           |                               |         |
| Haemoglobin, mean (SD), g/dL                                           | 13.1 (2.09)               | 13.6 (1.84)                   | 0.433   |
| Leucocytes, mean (SD), x10 <sup>3</sup> /μL                            | 8.91 (6.52)               | 7.47 (4.17)                   | <0.001  |
| Platelets, mean (SD), x10 <sup>3</sup> /μL                             | 247 (112)                 | 250 (116)                     | 0.705   |

|                                           |              |              |        |
|-------------------------------------------|--------------|--------------|--------|
| Monocytes, mean (SD), %                   | 7.21 (5.29)  | 8.19 (3.91)  | <0.001 |
| Lymphocytes, mean (SD), %                 | 15.6 (10.0)  | 19.0 (10.9)  | <0.001 |
| Neutrophils, mean (SD), %                 | 76.1 (13.5)  | 71.8 (13.5)  | <0.001 |
| Prothrombin time, mean (SD), s            | 15.6 (15.6)  | 14.8 (10.5)  | 0.076  |
| <b>Electrolytes</b>                       |              |              |        |
| Phosphorus, mean (SD), mg/dL              | 3.39 (0.971) | 3.15 (0.731) | 0.026  |
| Sodium, mean (SD), mg/dL                  | 138 (6.41)   | 138 (4.35)   | 0.537  |
| Calcium, mean (SD), mg/dL                 | 8.31 (0.648) | 8.39 (0.574) | 0.102  |
| <b>Blood gases</b>                        |              |              |        |
| CO <sub>2</sub> pressure, mean (SD), mmHg | 37.8 (9.95)  | 35.8 (7.42)  | 0.007  |
| O <sub>2</sub> pressure, mean (SD), mmHg  | 73.4 (35.4)  | 67.5 (30.9)  | 0.216  |
| O <sub>2</sub> saturation, mean (SD), %   | 90.3 (11.4)  | 89.1 (13.6)  | 0.694  |

CKD-EPI, Glomerular filtration rate estimate based on the CKD-EPI (Chronic Kidney Disease Epidemiology Collaboration) equation.

**Supplementary Figure 1.** Proportion of events (%) during hospitalization according to the presence of diabetes and age group (A) and sex (B).

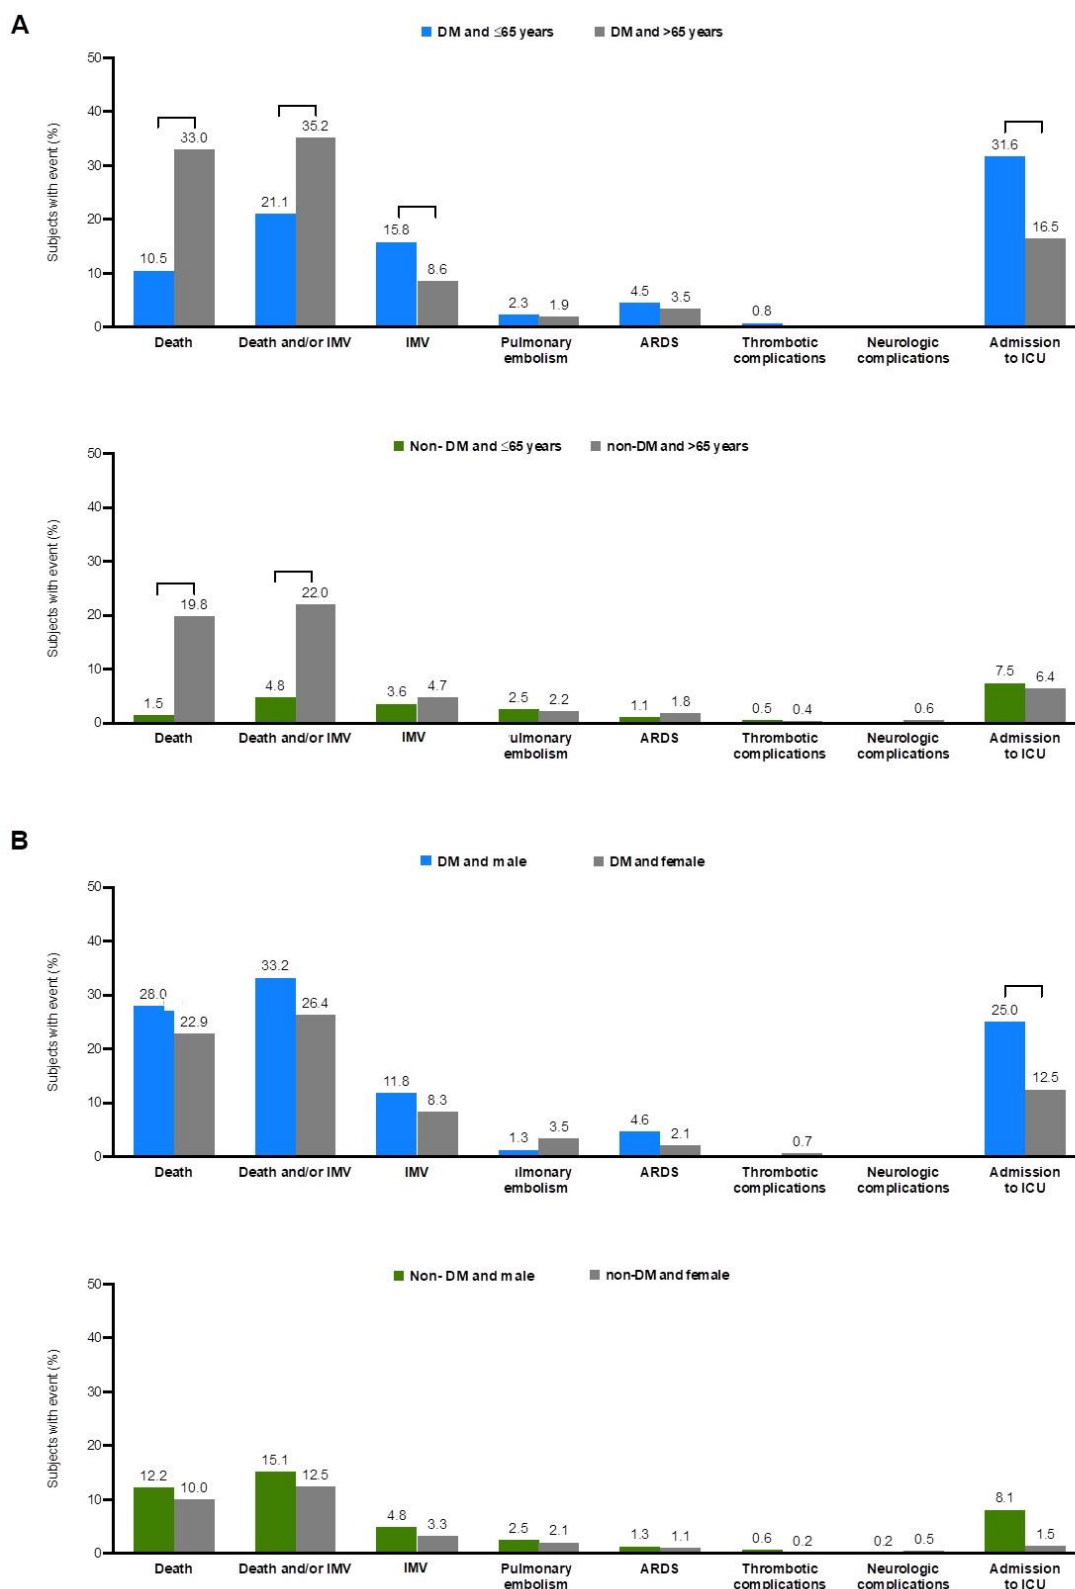

ARDS, acute respiratory distress syndrome; DM, diabetes mellitus; ICU, intensive care unit; IMV, invasive mechanical ventilation. \*\*\*  $p < 0.001$ ; \*\*  $p < 0.01$ ; \*  $p < 0.05$

**Supplementary table 2.** Number of events in patients with pre-existing diabetes and stress hyperglycaemia/unknown diabetes

|                                              | Pre-existing diabetes<br>(DM codes and/or HbA1c $\geq$ 6.5% and/or<br>antidiabetic treatment<br>N=302 | Stress hyperglycaemia/unknown<br>diabetes<br>glucose $\geq$ 200 mg/dl or insulin use in<br>the first 24 hours of admission<br>N=146 |
|----------------------------------------------|-------------------------------------------------------------------------------------------------------|-------------------------------------------------------------------------------------------------------------------------------------|
| Death                                        | 69 (22.8%)                                                                                            | 49 (33.6%)                                                                                                                          |
| Death and or invasive mechanical ventilation | 79 (26.2%)                                                                                            | 60 (41.1%)                                                                                                                          |
| Invasive mechanical ventilation              | 22 (7.28%)                                                                                            | 26 (17.8%)                                                                                                                          |
| Pulmonary embolism                           | 5 (1.66%)                                                                                             | 4 (2.74%)                                                                                                                           |
| Acute respiratory distress syndrome (ARDS)   | 7 (2.32%)                                                                                             | 10 (6.85%)                                                                                                                          |
| Thrombotic complications                     | 1 (0.33%)                                                                                             | 0 (0.00%)                                                                                                                           |
| Neurologic complications                     | 0 (0.00%)                                                                                             | 0 (0.00%)                                                                                                                           |
| Admission to intensive care unit             | 23 (7.62%)                                                                                            | 71 (48.6%)                                                                                                                          |

**Supplementary Table 3.** Clinical characteristics at baseline as predictors of death vs death or invasive mechanical ventilation according to the model with all potential independent variables included

| Predictors                        | Death       |             |         | Death or invasive mechanical ventilation |             |         |
|-----------------------------------|-------------|-------------|---------|------------------------------------------|-------------|---------|
|                                   | Odds Ratios | 95% CI      | p-value | Odds Ratios                              | 95% CI      | p-value |
| Diabetes (yes)                    | 2.325 ***   | 1.719–3.144 | <0.001  | 2.107 ***                                | 1.608–2.761 | <0.001  |
| Sex (male)                        | 1.977 ***   | 1.463–2.670 | <0.001  | 1.663 ***                                | 1.276–2.167 | <0.001  |
| Age (years)                       | 1.102 ***   | 1.087–1.117 | <0.001  | 1.063 ***                                | 1.052–1.075 | <0.001  |
| Obesity (yes)                     | 1.297       | 0.694–2.424 | 0.414   | 1.978 **                                 | 1.198–3.267 | 0.008   |
| Hypertension (yes)                | 1.188       | 0.874–1.613 | 0.271   | 1.188                                    | 0.902–1.565 | 0.221   |
| Hyperlipidaemia (yes)             | 1.289       | 0.919–1.808 | 0.141   | 1.158                                    | 0.853–1.572 | 0.346   |
| Cardiovascular diseases (yes)     | 1.721       | 0.999–2.966 | 0.051   | 1.403                                    | 0.830–2.370 | 0.206   |
| Heart failure (yes)               | 0.964       | 0.504–1.842 | 0.911   | 1.082                                    | 0.578–2.023 | 0.806   |
| Chronic renal insufficiency (yes) | 2.135 **    | 1.246–3.659 | 0.006   | 2.096 **                                 | 1.255–3.498 | 0.005   |
| COPD (yes)                        | 1.721 *     | 1.066–2.779 | 0.026   | 2.310 ***                                | 1.498–.564  | <0.001  |
| Observations                      | 2069        |             |         | 2069                                     |             |         |
| R2 Tjur                           | 0.208       |             |         | 0.157                                    |             |         |
| Hosmer–Lemeshow test              | 0.26        |             |         | 0.94                                     |             |         |

p<0.05 \*\* p<0.01 \*\*\* p<0.001

**Supplementary Table 4.** Mortality model evaluating diabetes and interactions with other clinical comorbid conditions regarding the outcome of death.

| Predictors                        | Death       |             |         |
|-----------------------------------|-------------|-------------|---------|
|                                   | Odds Ratios | 95% CI      | p-value |
| Diabetes * Obesity                | 0.720       | 0.214–2.425 | 0.596   |
| Diabetes * Hyperlipidaemia        | 0.766       | 0.407–1.442 | 0.408   |
| Diabetes * Heart failure          | 1.406       | 0.373–5.298 | 0.614   |
| Diabetes * Chronic kidney disease | 0.805       | 0.273–2.371 | 0.693   |
| Diabetes * COPD                   | 0.631       | 0.235–1.696 | 0.361   |

1  
2  
3  
4  
5  
6  
7  
8  
9  
10  
11  
12  
13  
14  
15  
16  
17  
18  
19  
20  
21  
22  
23  
24  
25  
26  
27  
28  
29  
30  
31  
32  
33  
34  
35  
36  
37  
38  
39  
40  
41  
42  
43  
44  
45  
46

**Supplementary Table 5.** Clinical characteristics at baseline associated with in-hospital death stratified for diabetes status (model 3, namely the model with all demographic and clinical variables included).

| Predictors              | Without diabetes |             |         | Diabetes    |             |         |
|-------------------------|------------------|-------------|---------|-------------|-------------|---------|
|                         | Odds Ratios      | 95% CI      | p-value | Odds Ratios | 95% CI      | p-value |
| Sex (male)              | 2.107 ***        | 1.516–2.929 | <0.001  | 2.125 *     | 1.014–4.451 | 0.046   |
| Age                     | 1.096 ***        | 1.081–1.112 | <0.001  | 1.124 ***   | 1.081–1.170 | <0.001  |
| Obesity                 | 1.984            | 0.938–4.198 | 0.073   | 0.826       | 0.272–2.511 | 0.736   |
| Hypertension            | 1.333            | 0.947–1.876 | 0.099   | 0.823       | 0.400–1.697 | 0.598   |
| Hyperlipidaemia         | 1.173            | 0.780–1.765 | 0.443   | 1.729       | 0.899–3.326 | 0.101   |
| Cardiovascular diseases | 1.943 *          | 1.033–3.654 | 0.039   | 1.368       | 0.445–4.208 | 0.584   |
| Heart failure           | 0.926            | 0.442–1.944 | 0.840   | 1.330       | 0.323–5.484 | 0.693   |
| Chronic kidney disease  | 2.143 *          | 1.137–4.038 | 0.018   | 2.839 *     | 1.000–8.060 | 0.050   |
| COPD                    | 1.712            | 0.984–2.979 | 0.057   | 1.404       | 0.529–3.729 | 0.495   |
| Observations            | 1795             |             |         | 274         |             |         |
| R2 Tjur                 | 0.178            |             |         | 0.240       |             |         |

p<0.05 \*\* p<0.01 \*\*\* p<0.001



**Supplementary Table 6.** Clinical characteristics at baseline associated to in-hospital death or mechanical ventilation stratified for diabetes status (model 3, namely the model with all demographic and clinical variables included).

| Predictors              | Without diabetes |             |         | Diabetes    |             |         |
|-------------------------|------------------|-------------|---------|-------------|-------------|---------|
|                         | Odds Ratios      | 95% CI      | p-value | Odds Ratios | 95% CI      | p-value |
| Sex (male)              | 1.710 ***        | 1.282–2.280 | <0.001  | 2.138 *     | 1.081–4.226 | 0.029   |
| Age                     | 1.061 ***        | 1.050–1.073 | <0.001  | 1.082 ***   | 1.047–1.118 | <0.001  |
| Obesity                 | 2.958 ***        | 1.651–5.298 | <0.001  | 1.090       | 0.420–2.827 | 0.860   |
| Hypertension            | 1.297            | 0.955–1.762 | 0.096   | 0.920       | 0.473–1.789 | 0.806   |
| Hyperlipidaemia         | 1.165            | 0.811–1.675 | 0.408   | 1.326       | 0.728–2.415 | 0.356   |
| Cardiovascular diseases | 1.525            | 0.827–2.814 | 0.177   | 1.217       | 0.426–3.477 | 0.714   |
| Heart failure           | 0.923            | 0.447–1.906 | 0.829   | 2.219       | 0.549–8.971 | 0.264   |
| Chronic kidney disease  | 1.993 *          | 1.084–3.662 | 0.026   | 3.140 *     | 1.163–8.474 | 0.024   |
| COPD                    | 2.298 **         | 1.396–3.781 | 0.001   | 1.976       | 0.800–4.885 | 0.140   |
| Observations            | 1795             |             |         | 274         |             |         |
| R2 Tjur                 | 0.129            |             |         | 0.190       |             |         |

p<0.05 \*\* p<0.01 \*\*\* p<0.001

1  
2  
3  
4  
5  
6  
7  
8  
9  
10  
11  
12  
13  
14  
15  
16  
17  
18  
19  
20  
21  
22  
23  
24  
25  
26  
27  
28  
29  
30  
31  
32  
33  
34  
35  
36  
37  
38  
39  
40  
41  
42  
43  
44  
45  
46

**Supplementary Table 7.** Multivariate model of the association between predictors and the odds of death and death or invasive mechanical ventilation based on the nonlinear glucose curve.

| Predictors              | Death      |             |         | Death or Invasive mechanical ventilation |             |         |
|-------------------------|------------|-------------|---------|------------------------------------------|-------------|---------|
|                         | Odds Ratio | 95% CI      | p-value | Odds Ratio                               | 95% CI      | p-value |
| Sex (male)              | 1.911 ***  | 1.375–2.655 | <0.001  | 1.540 **                                 | 1.159–2.047 | 0.003   |
| Age                     | 1.108 ***  | 1.090–1.125 | <0.001  | 1.062 ***                                | 1.049–1.074 | <0.001  |
| Obesity                 | 1.079      | 0.527–2.206 | 0.836   | 1.814 *                                  | 1.057–3.112 | 0.031   |
| Hypertension            | 1.109      | 0.800–1.537 | 0.534   | 1.134                                    | 0.849–1.515 | 0.394   |
| Hyperlipidaemia         | 1.330      | 0.928–1.906 | 0.120   | 1.152                                    | 0.837–1.585 | 0.386   |
| Cardiovascular diseases | 1.686      | 0.958–2.967 | 0.070   | 1.356                                    | 0.792–2.325 | 0.267   |
| Heart failure           | 0.768      | 0.388–1.520 | 0.448   | 0.911                                    | 0.472–1.757 | 0.781   |
| Chronic kidney disease  | 2.251 **   | 1.268–3.996 | 0.006   | 2.151 **                                 | 1.250–3.701 | 0.006   |
| COPD                    | 1.666 *    | 1.006–2.760 | 0.047   | 2.253 ***                                | 1.436–3.536 | <0.001  |
| Observations            | 1877       |             |         | 1877                                     |             |         |
| R2                      | 0.241      |             |         | 0.188                                    |             |         |

p<0.05 \*\* p<0.01 \*\*\* p<0.001

# Covid Data Save Lives

---

HM Hospitales makes an anonymous dataset freely available to the international medical and scientific community with all the available clinical information on patients treated in our hospital centers for the SARS-CoV-2 virus

Compared to most of the existing **databases on COVID-19**, focused on demographic data, this clinical dataset collects the different interactions in the **COVID-19 treatment process, including detailed information on diagnoses, treatments, admissions, ICU admissions, diagnostic imaging tests, laboratory results, discharge or death, among many other records.**

With the opening of this dataset, we intend to take the first step and serve as an example for other institutions to be encouraged to share their information and thus, together, be able to offer the medical and scientific community clinical data with which to obtain predictive models of evolution, epidemiological models, information on the response to the various treatments applied, **knowledge of virus for the creation of a vaccine, and sociodemographic data on the impact on the population of the virus.**

## Dataset “Covid Data Save lives”

The information in this data set comes from the HM Hospitales EHR system. It contains the anonymized records of 2,310 patients, admitted with a diagnosis of COVID POSITIVE or COVID PENDING, since the beginning of the epidemic to date. The information is organized in tables according to their content, all of them linked by a unique admission identifier. This identifier is the de-anonymization key, explicitly created for this purpose, and has nothing to do with the actual identifier of each admission.

- The main table includes data on the admission and the patient (age and sex), data on the previous emergency if there has been one (2,226 records), data on their stay in the ICU if there has been one and records of the first and last set of emergency constants.
- The medication table shows all the medication administered to each patient during admission (more than 60,000 records), with the dates

1  
2  
3 corresponding to the first and last administration of each drug, identified  
4 by their brand name and classification in the ATC5/ATC7.

- 5 • In the table of vital signs, there are all the basic records of constants  
6 (54,000 records so far) collected during admission with their date and  
7 time of registration.
- 8 • The laboratory table contains the results of the determinations (398,884  
9 records) of all the requests made to each patient during admission and in  
10 the previous emergency, if any.
- 11 • And finally, the ICD10 coding tables show the records of diagnostic and  
12 procedural information coded according to the international ICD10  
13 classification in its latest distributed version (does not include COVID),  
14 for the patients referred, both for episodes of hospital admission (more  
15 than 1,600) and for the emergency (more than 1,900) prior to those  
16 episodes, if any.

17  
18  
19  
20  
21  
22  
23  
24 Web page: <https://www.hmhospitales.com/coronavirus/covid-data-save-lives/english-version>

**The RECORD statement – checklist of items, extended from the STROBE statement, that should be reported in observational studies using routinely collected health data.**

**Risk factors for severe outcomes in people with diabetes hospitalized for COVID-19: A cross-sectional “Covid Data Save Lives” database study**

Emilio Ortega, Rosa Corcoy, Mònica Gratacòs, Xavier Cos-Claramunt, Manel Mata-Cases, Ramon Puig-Treserra, Jordi Real, Bogdan Vlachou, Esmeralda Castelblanco, Pere Domingo, Kamlesh Khunti, Josep Franch-Nadal and Dídac Mauricio

|                           | Item No. | STROBE items                                                                                                                                                                               | Location in manuscript where items are reported | RECORD items                                                                                                                                                                                                                                                                                                                                                                                                                                | Location in manuscript where items are reported |
|---------------------------|----------|--------------------------------------------------------------------------------------------------------------------------------------------------------------------------------------------|-------------------------------------------------|---------------------------------------------------------------------------------------------------------------------------------------------------------------------------------------------------------------------------------------------------------------------------------------------------------------------------------------------------------------------------------------------------------------------------------------------|-------------------------------------------------|
| <b>Title and abstract</b> |          |                                                                                                                                                                                            |                                                 |                                                                                                                                                                                                                                                                                                                                                                                                                                             |                                                 |
|                           | 1        | (a) Indicate the study's design with a commonly used term in the title or the abstract (b) Provide in the abstract an informative and balanced summary of what was done and what was found |                                                 | RECORD 1.1: The type of data used should be specified in the title or abstract. When possible, the name of the databases used should be included.<br><br>RECORD 1.2: If applicable, the geographic region and timeframe within which the study took place should be reported in the title or abstract.<br><br>RECORD 1.3: If linkage between databases was conducted for the study, this should be clearly stated in the title or abstract. | <b>Abstract</b>                                 |
| <b>Introduction</b>       |          |                                                                                                                                                                                            |                                                 |                                                                                                                                                                                                                                                                                                                                                                                                                                             |                                                 |
| Background rationale      | 2        | Explain the scientific background and rationale for the investigation being reported                                                                                                       |                                                 |                                                                                                                                                                                                                                                                                                                                                                                                                                             | <b>Page 4-5<br/>Lines: 2-24 and 1-22</b>        |
| Objectives                | 3        | State specific objectives, including any prespecified hypotheses                                                                                                                           |                                                 |                                                                                                                                                                                                                                                                                                                                                                                                                                             | <b>Page 6<br/>Lines: 4</b>                      |
| <b>Methods</b>            |          |                                                                                                                                                                                            |                                                 |                                                                                                                                                                                                                                                                                                                                                                                                                                             |                                                 |

|                                                                                                                                                                   |              |   |                                                                                                                                                                                                                                                                                                                                                                                                                                                                                                                                                                                                                                                                                                                              |  |                                                                                                                                                                                                                                                                                                                                                                                                                                                                                                                                                                                                                                                                                                      |                                              |
|-------------------------------------------------------------------------------------------------------------------------------------------------------------------|--------------|---|------------------------------------------------------------------------------------------------------------------------------------------------------------------------------------------------------------------------------------------------------------------------------------------------------------------------------------------------------------------------------------------------------------------------------------------------------------------------------------------------------------------------------------------------------------------------------------------------------------------------------------------------------------------------------------------------------------------------------|--|------------------------------------------------------------------------------------------------------------------------------------------------------------------------------------------------------------------------------------------------------------------------------------------------------------------------------------------------------------------------------------------------------------------------------------------------------------------------------------------------------------------------------------------------------------------------------------------------------------------------------------------------------------------------------------------------------|----------------------------------------------|
| 1<br>2                                                                                                                                                            | Study Design | 4 | Present key elements of study design early in the paper                                                                                                                                                                                                                                                                                                                                                                                                                                                                                                                                                                                                                                                                      |  |                                                                                                                                                                                                                                                                                                                                                                                                                                                                                                                                                                                                                                                                                                      | Page 7<br>Lines: 3-4                         |
| 3<br>4<br>5<br>6                                                                                                                                                  | Setting      | 5 | Describe the setting, locations, and relevant dates, including periods of recruitment, exposure, follow-up, and data collection                                                                                                                                                                                                                                                                                                                                                                                                                                                                                                                                                                                              |  |                                                                                                                                                                                                                                                                                                                                                                                                                                                                                                                                                                                                                                                                                                      | Page 7<br>Lines:4-11                         |
| 7<br>8<br>9<br>10<br>11<br>12<br>13<br>14<br>15<br>16<br>17<br>18<br>19<br>20<br>21<br>22<br>23<br>24<br>25<br>26<br>27<br>28<br>29<br>30<br>31<br>32<br>33<br>34 | Participants | 6 | <p>(a) <i>Cohort study</i> - Give the eligibility criteria, and the sources and methods of selection of participants. Describe methods of follow-up</p> <p><i>Case-control study</i> - Give the eligibility criteria, and the sources and methods of case ascertainment and control selection. Give the rationale for the choice of cases and controls</p> <p><i>Cross-sectional study</i> - Give the eligibility criteria, and the sources and methods of selection of participants</p> <p>(b) <i>Cohort study</i> - For matched studies, give matching criteria and number of exposed and unexposed</p> <p><i>Case-control study</i> - For matched studies, give matching criteria and the number of controls per case</p> |  | <p>RECORD 6.1: The methods of study population selection (such as codes or algorithms used to identify subjects) should be listed in detail. If this is not possible, an explanation should be provided.</p> <p>RECORD 6.2: Any validation studies of the codes or algorithms used to select the population should be referenced. If validation was conducted for this study and not published elsewhere, detailed methods and results should be provided.</p> <p>RECORD 6.3: If the study involved linkage of databases, consider use of a flow diagram or other graphical display to demonstrate the data linkage process, including the number of individuals with linked data at each stage.</p> | Page 7<br>Lines:19-24<br>Page 8<br>Lines:1-4 |
| 35<br>36<br>37<br>38<br>39<br>40<br>41<br>42<br>43<br>44<br>45<br>46<br>47                                                                                        | Variables    | 7 | Clearly define all outcomes, exposures, predictors, potential confounders, and effect modifiers. Give diagnostic criteria, if applicable.                                                                                                                                                                                                                                                                                                                                                                                                                                                                                                                                                                                    |  | RECORD 7.1: A complete list of codes and algorithms used to classify exposures, outcomes, confounders, and effect modifiers should be provided. If these cannot be reported, an explanation should be provided.                                                                                                                                                                                                                                                                                                                                                                                                                                                                                      | Page 8<br>Lines:5-14                         |

|                                                                                                                                              |                              |    |                                                                                                                                                                                                                                                                                                                                                                                                                                                                                                                                                                                                    |  |  |                                                                            |
|----------------------------------------------------------------------------------------------------------------------------------------------|------------------------------|----|----------------------------------------------------------------------------------------------------------------------------------------------------------------------------------------------------------------------------------------------------------------------------------------------------------------------------------------------------------------------------------------------------------------------------------------------------------------------------------------------------------------------------------------------------------------------------------------------------|--|--|----------------------------------------------------------------------------|
| 1<br>2<br>3<br>4<br>5<br>6<br>7                                                                                                              | Data sources/<br>measurement | 8  | For each variable of interest,<br>give sources of data and details<br>of methods of assessment<br>(measurement).<br>Describe comparability of<br>assessment methods if there is<br>more than one group                                                                                                                                                                                                                                                                                                                                                                                             |  |  | <b>Page 7</b><br><b>Lines:12-16</b>                                        |
| 8<br>9                                                                                                                                       | Bias                         | 9  | Describe any efforts to address<br>potential sources of bias                                                                                                                                                                                                                                                                                                                                                                                                                                                                                                                                       |  |  | <b>Page 9</b><br><b>Lines:1-7</b>                                          |
| 10<br>11<br>12                                                                                                                               | Study size                   | 10 | Explain how the study size was<br>arrived at                                                                                                                                                                                                                                                                                                                                                                                                                                                                                                                                                       |  |  | NA                                                                         |
| 13<br>14<br>15<br>16<br>17<br>18                                                                                                             | Quantitative<br>variables    | 11 | Explain how quantitative<br>variables were handled in the<br>analyses. If applicable, describe<br>which groupings were chosen,<br>and why                                                                                                                                                                                                                                                                                                                                                                                                                                                          |  |  | <b>Page 8</b><br><b>Lines:21-24</b>                                        |
| 19<br>20<br>21<br>22<br>23<br>24<br>25<br>26<br>27<br>28<br>29<br>30<br>31<br>32<br>33<br>34<br>35<br>36<br>37<br>38<br>39<br>40<br>41<br>42 | Statistical<br>methods       | 12 | (a) Describe all statistical<br>methods, including those used to<br>control for confounding<br>(b) Describe any methods used<br>to examine subgroups and<br>interactions<br>(c) Explain how missing data<br>were addressed<br>(d) <i>Cohort study</i> - If applicable,<br>explain how loss to follow-up<br>was addressed<br><i>Case-control study</i> - If<br>applicable, explain how<br>matching of cases and controls<br>was addressed<br><i>Cross-sectional study</i> - If<br>applicable, describe analytical<br>methods taking account of<br>sampling strategy<br>(e) Describe any sensitivity |  |  | <b>Page 8</b><br><b>Lines:21-24</b><br><b>Page 9</b><br><b>Lines: 1-12</b> |

|                                                                            |                                  |          |                                                                                                                                                                                                                                                                                                                        |                                                                                                                                                                                                                                                                                                                    |                       |
|----------------------------------------------------------------------------|----------------------------------|----------|------------------------------------------------------------------------------------------------------------------------------------------------------------------------------------------------------------------------------------------------------------------------------------------------------------------------|--------------------------------------------------------------------------------------------------------------------------------------------------------------------------------------------------------------------------------------------------------------------------------------------------------------------|-----------------------|
|                                                                            |                                  | analyses |                                                                                                                                                                                                                                                                                                                        |                                                                                                                                                                                                                                                                                                                    |                       |
| 1<br>2<br>3<br>4<br>5<br>6<br>7<br>8<br>9<br>10<br>11                      | Data access and cleaning methods | ..       |                                                                                                                                                                                                                                                                                                                        | RECORD 12.1: Authors should describe the extent to which the investigators had access to the database population used to create the study population.<br><br>RECORD 12.2: Authors should provide information on the data cleaning methods used in the study.                                                       | Page 7<br>Lines:12-18 |
| 12<br>13<br>14<br>15<br>16<br>17<br>18<br>19                               | Linkage                          | ..       |                                                                                                                                                                                                                                                                                                                        | RECORD 12.3: State whether the study included person-level, institutional-level, or other data linkage across two or more databases. The methods of linkage and methods of linkage quality evaluation should be provided.                                                                                          | NA                    |
| 20                                                                         | <b>Results</b>                   |          |                                                                                                                                                                                                                                                                                                                        |                                                                                                                                                                                                                                                                                                                    |                       |
| 21<br>22<br>23<br>24<br>25<br>26<br>27<br>28<br>29<br>30<br>31<br>32<br>33 | Participants                     | 13       | (a) Report the numbers of individuals at each stage of the study ( <i>e.g.</i> , numbers potentially eligible, examined for eligibility, confirmed eligible, included in the study, completing follow-up, and analysed)<br>(b) Give reasons for non-participation at each stage.<br>(c) Consider use of a flow diagram | RECORD 13.1: Describe in detail the selection of the persons included in the study ( <i>i.e.</i> , study population selection) including filtering based on data quality, data availability and linkage. The selection of included persons can be described in the text and/or by means of the study flow diagram. | Page 9<br>Lines:18-24 |
| 34<br>35<br>36<br>37<br>38<br>39<br>40<br>41<br>42                         | Descriptive data                 | 14       | (a) Give characteristics of study participants ( <i>e.g.</i> , demographic, clinical, social) and information on exposures and potential confounders<br>(b) Indicate the number of participants with missing data                                                                                                      |                                                                                                                                                                                                                                                                                                                    | Page 10<br>Lines:1-11 |



|                   |    |                                                                                                                                                                                                                                                                                                                                                                                                                 |  |                          |                                                                          |
|-------------------|----|-----------------------------------------------------------------------------------------------------------------------------------------------------------------------------------------------------------------------------------------------------------------------------------------------------------------------------------------------------------------------------------------------------------------|--|--------------------------|--------------------------------------------------------------------------|
|                   |    | for each variable of interest<br>(c) <i>Cohort study</i> - summarise follow-up time (e.g., average and total amount)                                                                                                                                                                                                                                                                                            |  |                          |                                                                          |
| Outcome data      | 15 | <i>Cohort study</i> - Report numbers of outcome events or summary measures over time<br><i>Case-control study</i> - Report numbers in each exposure category, or summary measures of exposure<br><i>Cross-sectional study</i> - Report numbers of outcome events or summary measures                                                                                                                            |  |                          | Page 10<br>Lines: 12-19                                                  |
| Main results      | 16 | (a) Give unadjusted estimates and, if applicable, confounder-adjusted estimates and their precision (e.g., 95% confidence interval). Make clear which confounders were adjusted for and why they were included<br>(b) Report category boundaries when continuous variables were categorized<br>(c) If relevant, consider translating estimates of relative risk into absolute risk for a meaningful time period |  |                          | Page 10<br>Lines:20-25<br>Page 11<br>Lines: 1-23<br>Page 12<br>Lines:1-4 |
| Other analyses    | 17 | Report other analyses done— e.g., analyses of subgroups and interactions, and sensitivity analyses                                                                                                                                                                                                                                                                                                              |  |                          | Page 12<br>Lines5-17                                                     |
| <b>Discussion</b> |    |                                                                                                                                                                                                                                                                                                                                                                                                                 |  |                          |                                                                          |
| Key results       | 18 | Summarise key results with reference to study objectives                                                                                                                                                                                                                                                                                                                                                        |  |                          | Page 12<br>Lines: 19-24                                                  |
| Limitations       | 19 | Discuss limitations of the study,                                                                                                                                                                                                                                                                                                                                                                               |  | RECORD 19.1: Discuss the | Page 14                                                                  |

|                                                           |    |                                                                                                                                                                            |  |                                                                                                                                                                                                                                                                                 |                                                                             |
|-----------------------------------------------------------|----|----------------------------------------------------------------------------------------------------------------------------------------------------------------------------|--|---------------------------------------------------------------------------------------------------------------------------------------------------------------------------------------------------------------------------------------------------------------------------------|-----------------------------------------------------------------------------|
|                                                           |    | taking into account sources of potential bias or imprecision. Discuss both direction and magnitude of any potential bias                                                   |  | implications of using data that were not created or collected to answer the specific research question(s). Include discussion of misclassification bias, unmeasured confounding, missing data, and changing eligibility over time, as they pertain to the study being reported. | <b>Lines:22-24</b><br><b>Page 15</b><br><b>Lines:1-22</b>                   |
| Interpretation                                            | 20 | Give a cautious overall interpretation of results considering objectives, limitations, multiplicity of analyses, results from similar studies, and other relevant evidence |  |                                                                                                                                                                                                                                                                                 | <b>Page 13</b><br><b>Lines:1-22</b><br><b>Page 14</b><br><b>Lines: 1-20</b> |
| Generalisability                                          | 21 | Discuss the generalisability (external validity) of the study results                                                                                                      |  |                                                                                                                                                                                                                                                                                 | <b>Page 16</b><br><b>Lines:1-10</b>                                         |
| <b>Other Information</b>                                  |    |                                                                                                                                                                            |  |                                                                                                                                                                                                                                                                                 |                                                                             |
| Funding                                                   | 22 | Give the source of funding and the role of the funders for the present study and, if applicable, for the original study on which the present article is based              |  |                                                                                                                                                                                                                                                                                 | <b>Page 17</b><br><b>Lines: 11</b>                                          |
| Accessibility of protocol, raw data, and programming code |    | ..                                                                                                                                                                         |  | RECORD 22.1: Authors should provide information on how to access any supplemental information such as the study protocol, raw data, or programming code.                                                                                                                        | <b>Page 17</b><br><b>Lines:12-13</b>                                        |

\*Reference: Benchimol EI, Smeeth L, Guttman A, Harron K, Moher D, Petersen I, Sørensen HT, von Elm E, Langan SM, the RECORD Working Committee. The REporting of studies Conducted using Observational Routinely-collected health Data (RECORD) Statement. *PLoS Medicine* 2015; in press.

\*Checklist is protected under Creative Commons Attribution ([CC BY](https://creativecommons.org/licenses/by/4.0/)) license.
