# Supplementary material for: Risk factors for severe outcomes in people with diabetes hospitalised for COVID-19: a cross-sectional database study
Source: PubMed Central journal article supplement — BMJ Open. 2021 Jul 22;11(7):e051237. doi: 10.1136/bmjopen-2021-051237 (PMC8300551; doi:10.1136/bmjopen-2021-051237), 2021-07-22
Supplement: bmjopen-2021-051237supp001.pdf [file bmjopen-2021-051237supp001.pdf]

## ONLINE-ONLY SUPPLEMENTARY MATERIALS

These supplemental materials have been provided by the authors to give the readers additional information about the study.

# Risk factors for severe outcomes in people with diabetes hospitalized for COVID-19: A cross-sectional “Covid Data Save Lives” database study

Emilio Ortega <sup>1,2,3</sup>, Rosa Corcoy <sup>4,5,6</sup>, Mònica Gratacòs<sup>1</sup>, Xavier Cos-Claramunt <sup>1,7</sup>, Manel Mata-Cases <sup>1,8,10</sup>, Ramon Puig-Treserra<sup>1</sup>, Jordi Real <sup>1</sup>, Bogdan Vlacho <sup>1</sup>, Esmeralda Castelblanco <sup>1,8</sup>, Pere Domingo <sup>9</sup>, Kamlesh Khunti <sup>11</sup>, Josep Franch-Nadal <sup>1,8,12\*</sup> and Dídac Mauricio <sup>1,4,8,13\*</sup>

| TABLE OF CONTENTS              |                                                                                                                                                                                                                 |      |
|--------------------------------|-----------------------------------------------------------------------------------------------------------------------------------------------------------------------------------------------------------------|------|
|                                |                                                                                                                                                                                                                 | PAGE |
| <b>Supplementary Table 1</b>   | Basal vital signs and laboratory measurements of patients admitted for coronavirus according to the presence of diabetes mellitus                                                                               | 2    |
| <b>Supplementary Figure 1.</b> | Proportion of events (%) during hospitalization according to the presence of diabetes and age group (A) and sex (B).                                                                                            | 4    |
| <b>Supplementary Table 2.</b>  | Number of events in patients with pre-existing diabetes and stress hyperglycaemia/unknown diabetes.                                                                                                             | 5    |
| <b>Supplementary Table 3.</b>  | Clinical characteristics at baseline as predictors of death vs death or invasive mechanical ventilation according to the model with all potential independent variables included.                               | 6    |
| <b>Supplementary Table 4.</b>  | Mortality model evaluating diabetes and interactions with other clinical comorbid conditions regarding the outcome of death.                                                                                    | 7    |
| <b>Supplementary Table 5.</b>  | Clinical characteristics at baseline associated with in-hospital death stratified for diabetes status (model 3, namely the model with all demographic and clinical variables included).                         | 8    |
| <b>Supplementary Table 6.</b>  | Clinical characteristics at baseline associated to in-hospital death or mechanical ventilation stratified for diabetes status (model 3, namely the model with all demographic and clinical variables included). | 9    |
| <b>Supplementary Table 7.</b>  | Multivariate model of the association between predictors and the odds of death and death or invasive mechanical ventilation based on the nonlinear glucose curve.                                               | 10   |
| <b>Supplementary text</b>      | Database description.                                                                                                                                                                                           | 11   |

**Supplementary Table 1.** Basal vital signs and laboratory measurements of patients admitted for coronavirus according to the presence of diabetes mellitus

|                                                                        | <b>Diabetes<br/>N=448</b> | <b>No diabetes<br/>N=1621</b> | p-value |
|------------------------------------------------------------------------|---------------------------|-------------------------------|---------|
| <b>Vital signs</b>                                                     |                           |                               |         |
| Systolic blood arterial pressure, mean (SD), mmHg                      | 128 (19.7)                | 123 (19.3)                    | 0.037   |
| Diastolic blood arterial pressure, mean (SD), mmHg                     | 72.0 (12.1)               | 71.1 (12.5)                   | 0.501   |
| Heart rate, mean (SD), bpm                                             | 80.2 (14.7)               | 79.4 (14.9)                   | 0.641   |
| Temperature, mean (SD), °C                                             | 36.5 (0.823)              | 36.5 (0.805)                  | 0.086   |
| <b>Basal laboratory measurements</b>                                   |                           |                               |         |
| <b>Renal function</b>                                                  |                           |                               |         |
| Glomerular filtration (CKD-EPI), mean (SD), mL/min/1.73 m <sup>2</sup> | 73.5 (26.5)               | 81.2 (23.9)                   | <0.001  |
| Creatinine, mean (SD), mg/dL                                           | 1.09 (0.716)              | 0.943 (0.510)                 | <0.001  |
| <b>Inflammation markers</b>                                            |                           |                               |         |
| Procalcitonin, mean (SD), ng/mL                                        | 0.661 (1.30)              | 0.387 (1.30)                  | <0.001  |
| C-reactive protein, mean (SD), mg/L                                    | 97.1 (107)                | 75.9 (82.5)                   | <0.001  |
| <b>Other biochemical markers</b>                                       |                           |                               |         |
| D-dimer, mean (SD), ng/mL                                              | 3990 (10800)              | 2340 (6720)                   | <0.001  |
| <b>Liver function</b>                                                  |                           |                               |         |
| Alkaline phosphatase, mean (SD), U/L                                   | 78.3 (39.1)               | 78.6 (62.3)                   | 0.984   |
| Lactate dehydrogenase, mean (SD), U/L                                  | 644 (399)                 | 575 (311)                     | <0.001  |
| Gamma-glutamyl transferase, mean (SD), U/L                             | 93.8 (135)                | 88.4 (123)                    | 0.804   |
| Aspartate aminotransferase, mean (SD), U/L                             | 49.6 (165)                | 42.7 (57.8)                   | 0.022   |
| Alanine aminotransferase, mean (SD), U/L                               | 51.7 (136)                | 45.1 (60.6)                   | 0.354   |
| <b>Haematology parameters</b>                                          |                           |                               |         |
| Haemoglobin, mean, (SD), g/dL                                          | 13.1 (2.09)               | 13.6 (1.84)                   | 0.433   |
| Leucocytes, mean (SD), x10 <sup>3</sup> /μL                            | 8.91 (6.52)               | 7.47 (4.17)                   | <0.001  |
| Platelets, mean (SD), x10 <sup>3</sup> /μL                             | 247 (112)                 | 250 (116)                     | 0.705   |

|                                           |              |              |        |
|-------------------------------------------|--------------|--------------|--------|
| Monocytes, mean (SD), %                   | 7.21 (5.29)  | 8.19 (3.91)  | <0.001 |
| Lymphocytes, mean (SD), %                 | 15.6 (10.0)  | 19.0 (10.9)  | <0.001 |
| Neutrophils, mean (SD), %                 | 76.1 (13.5)  | 71.8 (13.5)  | <0.001 |
| Prothrombin time, mean (SD), s            | 15.6 (15.6)  | 14.8 (10.5)  | 0.076  |
| <b>Electrolytes</b>                       |              |              |        |
| Phosphorus, mean (SD), mg/dL              | 3.39 (0.971) | 3.15 (0.731) | 0.026  |
| Sodium, mean (SD), mg/dL                  | 138 (6.41)   | 138 (4.35)   | 0.537  |
| Calcium, mean (SD), mg/dL                 | 8.31 (0.648) | 8.39 (0.574) | 0.102  |
| <b>Blood gases</b>                        |              |              |        |
| CO <sub>2</sub> pressure, mean (SD), mmHg | 37.8 (9.95)  | 35.8 (7.42)  | 0.007  |
| O <sub>2</sub> pressure, mean (SD), mmHg  | 73.4 (35.4)  | 67.5 (30.9)  | 0.216  |
| O <sub>2</sub> saturation, mean (SD), %   | 90.3 (11.4)  | 89.1 (13.6)  | 0.694  |

CKD-EPI, Glomerular filtration rate estimate based on the CKD-EPI (Chronic Kidney Disease Epidemiology Collaboration) equation.

**Supplementary Figure 1.** Proportion of events (%) during hospitalization according to the presence of diabetes and age group (A) and sex (B).

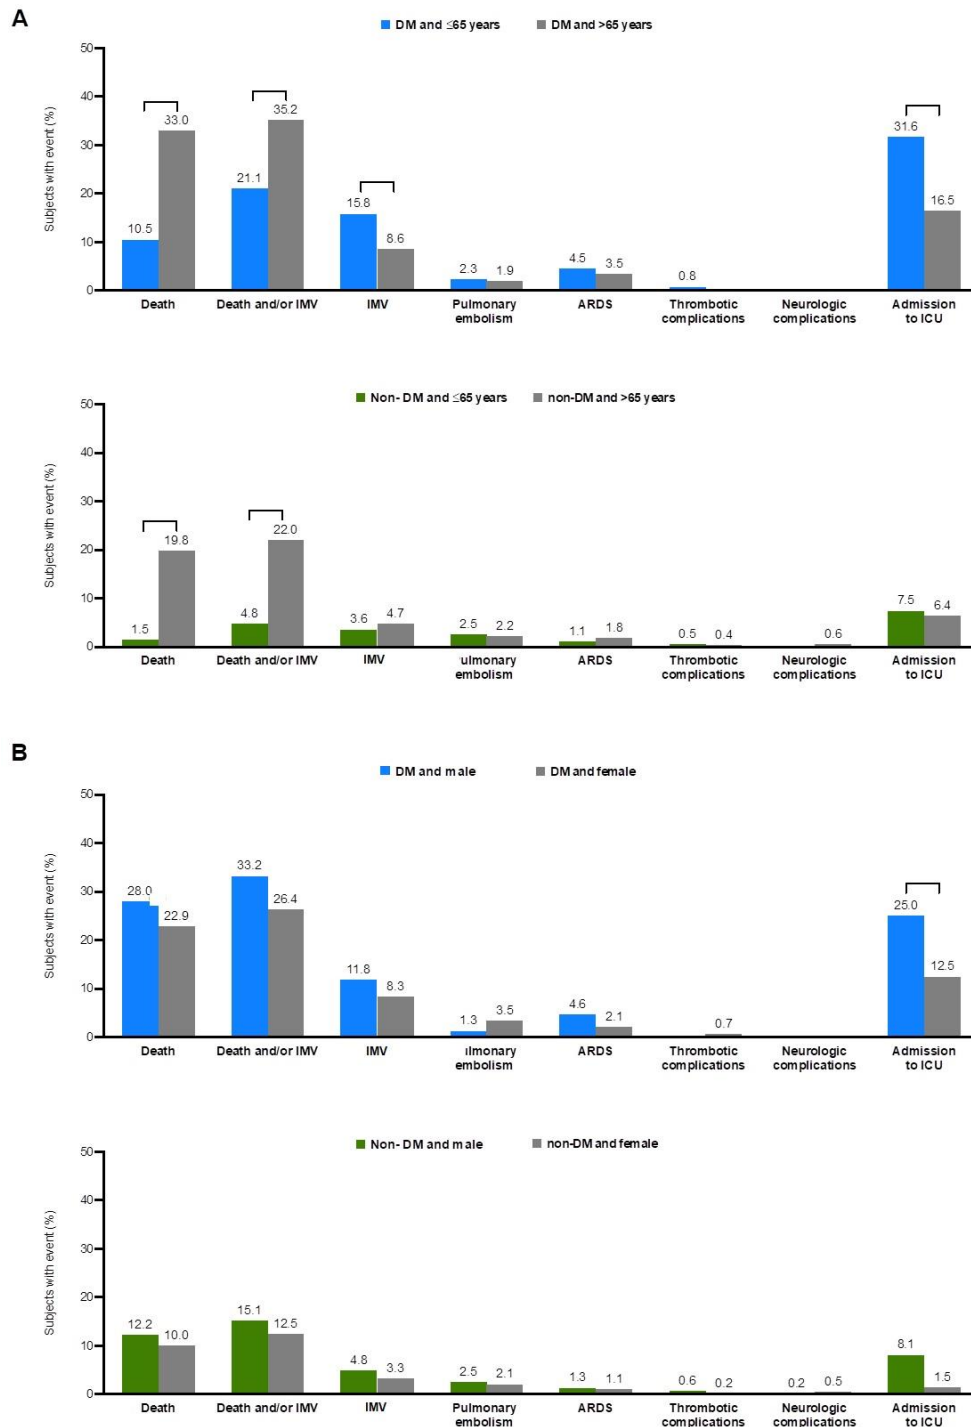

ARDS, acute respiratory distress syndrome; DM, diabetes mellitus; ICU, intensive care unit; IMV, invasive mechanical ventilation. \*\*\*  $p < 0.001$ ; \*\*  $p < 0.01$ ; \*  $p < 0.05$

**Supplementary table 2.** Number of events in patients with pre-existing diabetes and stress hyperglycaemia/unknown diabetes

|                                              | Pre-existing diabetes<br>(DM codes and/or HbA1c $\geq$ 6.5% and/or<br>antidiabetic treatment<br>N=302 | Stress hyperglycaemia/unknown<br>diabetes<br>glucose $\geq$ 200 mg/dl or insulin use in<br>the first 24 hours of admission<br>N=146 |
|----------------------------------------------|-------------------------------------------------------------------------------------------------------|-------------------------------------------------------------------------------------------------------------------------------------|
| Death                                        | 69 (22.8%)                                                                                            | 49 (33.6%)                                                                                                                          |
| Death and or invasive mechanical ventilation | 79 (26.2%)                                                                                            | 60 (41.1%)                                                                                                                          |
| Invasive mechanical ventilation              | 22 (7.28%)                                                                                            | 26 (17.8%)                                                                                                                          |
| Pulmonary embolism                           | 5 (1.66%)                                                                                             | 4 (2.74%)                                                                                                                           |
| Acute respiratory distress syndrome (ARDS)   | 7 (2.32%)                                                                                             | 10 (6.85%)                                                                                                                          |
| Thrombotic complications                     | 1 (0.33%)                                                                                             | 0 (0.00%)                                                                                                                           |
| Neurologic complications                     | 0 (0.00%)                                                                                             | 0 (0.00%)                                                                                                                           |
| Admission to intensive care unit             | 23 (7.62%)                                                                                            | 71 (48.6%)                                                                                                                          |

**Supplementary Table 3.** Clinical characteristics at baseline as predictors of death vs death or invasive mechanical ventilation according to the model with all potential independent variables included

| Predictors                        | Death       |             |         | Death or invasive mechanical ventilation |             |         |
|-----------------------------------|-------------|-------------|---------|------------------------------------------|-------------|---------|
|                                   | Odds Ratios | 95% CI      | p-value | Odds Ratios                              | 95% CI      | p-value |
| Diabetes (yes)                    | 2.325 ***   | 1.719–3.144 | <0.001  | 2.107 ***                                | 1.608–2.761 | <0.001  |
| Sex (male)                        | 1.977 ***   | 1.463–2.670 | <0.001  | 1.663 ***                                | 1.276–2.167 | <0.001  |
| Age (years)                       | 1.102 ***   | 1.087–1.117 | <0.001  | 1.063 ***                                | 1.052–1.075 | <0.001  |
| Obesity (yes)                     | 1.297       | 0.694–2.424 | 0.414   | 1.978 **                                 | 1.198–3.267 | 0.008   |
| Hypertension (yes)                | 1.188       | 0.874–1.613 | 0.271   | 1.188                                    | 0.902–1.565 | 0.221   |
| Hyperlipidaemia (yes)             | 1.289       | 0.919–1.808 | 0.141   | 1.158                                    | 0.853–1.572 | 0.346   |
| Cardiovascular diseases (yes)     | 1.721       | 0.999–2.966 | 0.051   | 1.403                                    | 0.830–2.370 | 0.206   |
| Heart failure (yes)               | 0.964       | 0.504–1.842 | 0.911   | 1.082                                    | 0.578–2.023 | 0.806   |
| Chronic renal insufficiency (yes) | 2.135 **    | 1.246–3.659 | 0.006   | 2.096 **                                 | 1.255–3.498 | 0.005   |
| COPD (yes)                        | 1.721 *     | 1.066–2.779 | 0.026   | 2.310 ***                                | 1.498–.564  | <0.001  |
| Observations                      | 2069        |             |         | 2069                                     |             |         |
| R2 Tjur                           | 0.208       |             |         | 0.157                                    |             |         |
| Hosmer–Lemeshow test              | 0.26        |             |         | 0.94                                     |             |         |

p&lt;0.05 \*\* p&lt;0.01 \*\*\* p&lt;0.001

**Supplementary Table 4.** Mortality model evaluating diabetes and interactions with other clinical comorbid conditions regarding the outcome of death.

| Predictors                        | Death       |             |         |
|-----------------------------------|-------------|-------------|---------|
|                                   | Odds Ratios | 95% CI      | p-value |
| Diabetes * Obesity                | 0.720       | 0.214–2.425 | 0.596   |
| Diabetes * Hyperlipidaemia        | 0.766       | 0.407–1.442 | 0.408   |
| Diabetes * Heart failure          | 1.406       | 0.373–5.298 | 0.614   |
| Diabetes * Chronic kidney disease | 0.805       | 0.273–2.371 | 0.693   |
| Diabetes * COPD                   | 0.631       | 0.235–1.696 | 0.361   |

**Supplementary Table 5.** Clinical characteristics at baseline associated with in-hospital death stratified for diabetes status (model 3, namely the model with all demographic and clinical variables included).

| Predictors              | Without diabetes |             |         | Diabetes    |             |         |
|-------------------------|------------------|-------------|---------|-------------|-------------|---------|
|                         | Odds Ratios      | 95% CI      | p-value | Odds Ratios | 95% CI      | p-value |
| Sex (male)              | 2.107 ***        | 1.516–2.929 | <0.001  | 2.125 *     | 1.014–4.451 | 0.046   |
| Age                     | 1.096 ***        | 1.081–1.112 | <0.001  | 1.124 ***   | 1.081–1.170 | <0.001  |
| Obesity                 | 1.984            | 0.938–4.198 | 0.073   | 0.826       | 0.272–2.511 | 0.736   |
| Hypertension            | 1.333            | 0.947–1.876 | 0.099   | 0.823       | 0.400–1.697 | 0.598   |
| Hyperlipidaemia         | 1.173            | 0.780–1.765 | 0.443   | 1.729       | 0.899–3.326 | 0.101   |
| Cardiovascular diseases | 1.943 *          | 1.033–3.654 | 0.039   | 1.368       | 0.445–4.208 | 0.584   |
| Heart failure           | 0.926            | 0.442–1.944 | 0.840   | 1.330       | 0.323–5.484 | 0.693   |
| Chronic kidney disease  | 2.143 *          | 1.137–4.038 | 0.018   | 2.839 *     | 1.000–8.060 | 0.050   |
| COPD                    | 1.712            | 0.984–2.979 | 0.057   | 1.404       | 0.529–3.729 | 0.495   |
| Observations            | 1795             |             |         | 274         |             |         |
| R2 Tjur                 | 0.178            |             |         | 0.240       |             |         |

p<0.05 \*\* p<0.01 \*\*\* p<0.001



**Supplementary Table 6.** Clinical characteristics at baseline associated to in-hospital death or mechanical ventilation stratified for diabetes status (model 3, namely the model with all demographic and clinical variables included).

| Predictors              | Without diabetes |             |         | Diabetes    |             |         |
|-------------------------|------------------|-------------|---------|-------------|-------------|---------|
|                         | Odds Ratios      | 95% CI      | p-value | Odds Ratios | 95% CI      | p-value |
| Sex (male)              | 1.710 ***        | 1.282–2.280 | <0.001  | 2.138 *     | 1.081–4.226 | 0.029   |
| Age                     | 1.061 ***        | 1.050–1.073 | <0.001  | 1.082 ***   | 1.047–1.118 | <0.001  |
| Obesity                 | 2.958 ***        | 1.651–5.298 | <0.001  | 1.090       | 0.420–2.827 | 0.860   |
| Hypertension            | 1.297            | 0.955–1.762 | 0.096   | 0.920       | 0.473–1.789 | 0.806   |
| Hyperlipidaemia         | 1.165            | 0.811–1.675 | 0.408   | 1.326       | 0.728–2.415 | 0.356   |
| Cardiovascular diseases | 1.525            | 0.827–2.814 | 0.177   | 1.217       | 0.426–3.477 | 0.714   |
| Heart failure           | 0.923            | 0.447–1.906 | 0.829   | 2.219       | 0.549–8.971 | 0.264   |
| Chronic kidney disease  | 1.993 *          | 1.084–3.662 | 0.026   | 3.140 *     | 1.163–8.474 | 0.024   |
| COPD                    | 2.298 **         | 1.396–3.781 | 0.001   | 1.976       | 0.800–4.885 | 0.140   |
| Observations            | 1795             |             |         | 274         |             |         |
| R2 Tjur                 | 0.129            |             |         | 0.190       |             |         |

p<0.05 \*\* p<0.01 \*\*\* p<0.001

**Supplementary Table 7.** Multivariate model of the association between predictors and the odds of death and death or invasive mechanical ventilation based on the nonlinear glucose curve.

| Predictors              | Death      |             |         | Death or Invasive mechanical ventilation |             |         |
|-------------------------|------------|-------------|---------|------------------------------------------|-------------|---------|
|                         | Odds Ratio | 95% CI      | p-value | Odds Ratio                               | 95% CI      | p-value |
| Sex (male)              | 1.911 ***  | 1.375–2.655 | <0.001  | 1.540 **                                 | 1.159–2.047 | 0.003   |
| Age                     | 1.108 ***  | 1.090–1.125 | <0.001  | 1.062 ***                                | 1.049–1.074 | <0.001  |
| Obesity                 | 1.079      | 0.527–2.206 | 0.836   | 1.814 *                                  | 1.057–3.112 | 0.031   |
| Hypertension            | 1.109      | 0.800–1.537 | 0.534   | 1.134                                    | 0.849–1.515 | 0.394   |
| Hyperlipidaemia         | 1.330      | 0.928–1.906 | 0.120   | 1.152                                    | 0.837–1.585 | 0.386   |
| Cardiovascular diseases | 1.686      | 0.958–2.967 | 0.070   | 1.356                                    | 0.792–2.325 | 0.267   |
| Heart failure           | 0.768      | 0.388–1.520 | 0.448   | 0.911                                    | 0.472–1.757 | 0.781   |
| Chronic kidney disease  | 2.251 **   | 1.268–3.996 | 0.006   | 2.151 **                                 | 1.250–3.701 | 0.006   |
| COPD                    | 1.666 *    | 1.006–2.760 | 0.047   | 2.253 ***                                | 1.436–3.536 | <0.001  |
| Observations            | 1877       |             |         | 1877                                     |             |         |
| R2                      | 0.241      |             |         | 0.188                                    |             |         |

p&lt;0.05 \*\* p&lt;0.01 \*\*\* p&lt;0.001

## Covid Data Save Lives

---

HM Hospitales makes an anonymous dataset freely available to the international medical and scientific community with all the available clinical information on patients treated in our hospital centers for the SARS-CoV-2 virus

Compared to most of the existing **databases on COVID-19**, focused on demographic data, this clinical dataset collects the different interactions in the **COVID-19 treatment process, including detailed information on diagnoses, treatments, admissions, ICU admissions, diagnostic imaging tests, laboratory results, discharge or death, among many other records.**

With the opening of this dataset, we intend to take the first step and serve as an example for other institutions to be encouraged to share their information and thus, together, be able to offer the medical and scientific community clinical data with which to obtain predictive models of evolution, epidemiological models, information on the response to the various treatments applied, **knowledge of virus for the creation of a vaccine, and sociodemographic data on the impact on the population of the virus.**

### Dataset “Covid Data Save lives”

The information in this data set comes from the HM Hospitales EHR system. It contains the anonymized records of 2,310 patients, admitted with a diagnosis of COVID POSITIVE or COVID PENDING, since the beginning of the epidemic to date. The information is organized in tables according to their content, all of them linked by a unique admission identifier. This identifier is the de-anonymization key, explicitly created for this purpose, and has nothing to do with the actual identifier of each admission.

- The main table includes data on the admission and the patient (age and sex), data on the previous emergency if there has been one (2,226 records), data on their stay in the ICU if there has been one and records of the first and last set of emergency constants.
- The medication table shows all the medication administered to each patient during admission (more than 60,000 records), with the dates

corresponding to the first and last administration of each drug, identified by their brand name and classification in the ATC5/ATC7.

- In the table of vital signs, there are all the basic records of constants (54,000 records so far) collected during admission with their date and time of registration.
- The laboratory table contains the results of the determinations (398,884 records) of all the requests made to each patient during admission and in the previous emergency, if any.
- And finally, the ICD10 coding tables show the records of diagnostic and procedural information coded according to the international ICD10 classification in its latest distributed version (does not include COVID), for the patients referred, both for episodes of hospital admission (more than 1,600) and for the emergency (more than 1,900) prior to those episodes, if any.

**Web page:** <https://www.hmhospitales.com/coronavirus/covid-data-save-lives/english-version>
